# Supplementary material for: Highly efficient catalyst-free domino conjugate addition, decarboxylation and esterification/amidation of coumarin carboxylic acid/esters with pyrazolones: a green chemistry approach
Source: Royal Society of Chemistry journal article supplement (doi:10.1039/d0ra01906b), 2020-01-01

## Supporting Information

### **Highly Efficient Catalyst-Free Domino Conjugate Addition, Decarboxylation and Esterification/Amidation of Coumarin Carboxylic Acid/Esters with Pyrazolones: Green Chemistry Approach**

Shanta Raj Lakshmi,<sup>a</sup> Vipin Singh,<sup>a</sup> L. Raju Chowhan<sup>\*a</sup>

<sup>a</sup>Centre for Applied Chemistry, Central University of Gujarat, Sector 30, Gandhinagar, INDIA-382030.

\*Corresponding author E-mail: rchowhan@cug.ac.in

## Table of content

|                                                                                                   |         |
|---------------------------------------------------------------------------------------------------|---------|
| 1. General information.....                                                                       | S3      |
| 2. General procedure for the synthesis of pyrazolyl phenyl propionic acid/esters <b>3a-m</b> .... | S3      |
| 3. Spectral data of <b>3a-n</b> .....                                                             | S4-S10  |
| 4. General procedure for the synthesis of amides <b>5a-t</b> .....                                | S11     |
| 5. Spectral data of <b>5a-t</b> .....                                                             | S11-S22 |
| 6. <sup>1</sup> H and <sup>13</sup> C NMR spectra of <b>3a-m</b> and <b>5a-t</b> .....            | S23-S55 |

### **General information**

All commercially available chemicals were used without further purification.  $^1\text{H}$  NMR spectra were obtained on Bruker 500 MHz FT-NMR spectrometers.  $^{13}\text{C}$  NMR spectra were recorded at 125MHz's Chemical shifts are reported in relative to the TMS signal. Multiplicity is indicated as follows: s (singlet); bs (broad singlet); d (doublet); t (triplet); q (quartet); m (multiplet); dd (doublet of doublets), etc. FT-IR spectrometer (Shimadzu) in the range of 400–4000  $\text{cm}^{-1}$ . TOF and quadrupole mass analyzer types are used for the HRMS measurements. Coumarins were synthesised by following the reported literature procedure.<sup>1</sup>

### **General procedure for the synthesis of pyrazolyl phenyl propionic acid/esters 3a-m**

In a 5 mL round bottom flask containing a solution of coumarin 3-carboxylic acid/ester **1** (1 mmol) in 4 mL of solvent (water/MeOH/i-PrOH) was added 5-methyl-2,4-dihydro-3H-pyrazol-3-one **2a** (1 mmol), fixed the reflux condenser and stirred for 18 h maintaining the temperature at 65 °C. The reaction mixture becomes homogeneous while the reaction is in progress. The progress of reaction was monitored by TLC. After completion of the reaction, the solid product **3** filtered on sintered glass funnel and washed with water (2x10 mL), MeOH (2x10 mL). The solid was collected was then dried in vacuum. The obtained product was pure and does not require any further purification.

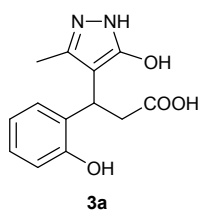

### 3-(2-hydroxyphenyl)-3-(5-methyl-3-oxo-3H-pyrazol-4-yl)propanoic acid (3a)

Pale white solid, yield: 87%; TLC (SiO<sub>2</sub>): R<sub>f</sub> = 0.53 (70% EtOAc/Hexanes); IR (neat): 3358, 3303, 2645, 1751, 1608, 1586, 1520, 1484, 1455, 1345, 1281, 1268, 1151, 1101, 1030, 960, 873, 807, 728, 697, 667 cm<sup>-1</sup>; <sup>1</sup>H NMR (500 MHz, CDCl<sub>3</sub>) δ 7.26 (d, *J* = 6.1 Hz, 1H), 7.13 – 7.01 (m, 2H), 6.97 (d, *J* = 7.3 Hz, 1H), 4.26 (s, 1H), 3.08 (dd, *J* = 15.7, 10.1 Hz, 1H), 2.89 – 2.78 (m, 1H), 1.95 (s, 3H). <sup>13</sup>C NMR (126 MHz, DMSO) δ 168.0, 159.4, 151.3, 137.1, 128.1, 127.6, 126.1, 124.2, 116.3, 99.1, 34.4, 28.9, 9.9.; HRMS (ESI<sup>+</sup>): *m/z* calculated for [C<sub>13</sub>H<sub>12</sub>N<sub>2</sub>O<sub>4</sub> + H]<sup>+</sup>: 263.1031; found: 263.1056.

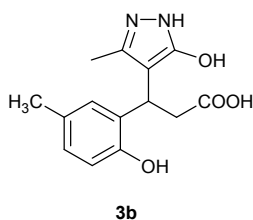

### 3-(2-hydroxy-5-methylphenyl)-3-(5-methyl-3-oxo-3H-pyrazol-4-yl)propanoic acid (3b)

Pale white solid, yield: 85%; TLC (SiO<sub>2</sub>): R<sub>f</sub> = 0.57 (70% EtOAc/Hexanes); IR (neat): 3461, 3412, 1746, 1708, 1616, 1519, 1490, 1342, 1254, 1168, 1117, 928, 873, 818, 600 cm<sup>-1</sup>; <sup>1</sup>H NMR (500 MHz, DMSO) δ 7.07 (t, *J* = 14.8 Hz, 1H), 6.97 (d, *J* = 7.8 Hz, 1H), 6.78 (s, 1H), 4.25 (s, 1H), 3.13 – 2.94 (m, 1H), 2.91 – 2.81 (m, 1H), 2.23 (s, 3H), 1.95 (s, 3H). <sup>13</sup>C NMR (126 MHz, DMSO) δ 168.1, 159.4, 149.3, 137.2, 134, 128.5, 127.8, 125.7, 116, 99.3, 34.5, 28.9, 20.3, 9.9.; HRMS (ESI<sup>+</sup>): *m/z* calculated for [C<sub>14</sub>H<sub>14</sub>N<sub>2</sub>O<sub>4</sub> + H]<sup>+</sup>: 277.1110; found: 277.1215.

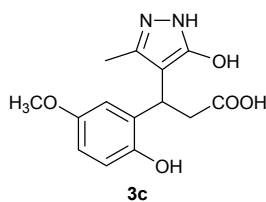

**3-(2-hydroxy-5-methoxyphenyl)-3-(5-methyl-3-oxo-3H-pyrazol-4-yl)propanoic acid (3c)**

Pale white solid, yield: 86%; TLC (SiO<sub>2</sub>): R<sub>f</sub> = 0.55 (70% EtOAc/Hexanes); IR (neat): 3479, 2830, 2653, 1759, 1611, 1591, 1533, 1487, 1345, 1267, 1198, 1068, 924, 880, 792, 669, 624 cm<sup>-1</sup>; <sup>1</sup>H NMR (500 MHz, DMSO) δ 7.03 (d, *J* = 8.8 Hz, 1H), 6.85 (d, *J* = 8.8 Hz, 1H), 6.49 (s, 1H), 4.30 – 4.20 (m, 1H), 3.67 (s, 3H), 3.01 (dd, *J* = 15.9, 9.6 Hz, 1H), 2.82 (dd, *J* = 16.0, 5.5 Hz, 1H), 1.93 (s, 3H). <sup>13</sup>C NMR (126 MHz, CDCl<sub>3</sub>) δ 168.3, 159.5, 155.8, 145.4, 137.3, 127.4, 117.2, 112.9, 112.9, 99.1, 55.5, 34.5, 29.3, 10.0; HRMS (ESI<sup>+</sup>): *m/z* calculated for [C<sub>14</sub>H<sub>16</sub>N<sub>2</sub>O<sub>5</sub> + H]<sup>+</sup>: 293.1137; found: 293.1163.

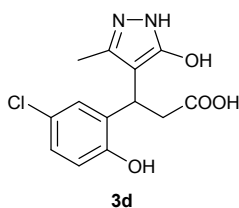

**3-(5-chloro-2-hydroxyphenyl)-3-(5-methyl-3-oxo-3H-pyrazol-4-yl)propanoic acid (3d)**

Pale white solid, yield: 80%; TLC (SiO<sub>2</sub>): R<sub>f</sub> = 0.58 (70% EtOAc/Hexanes); IR (neat): 3305, 2919, 1863, 1708, 1586, 1534, 1496, 1435, 1416, 1308, 1275, 1254, 1243, 1197, 970, 895, 754, 649 cm<sup>-1</sup>; <sup>1</sup>H NMR (500 MHz, DMSO) δ 7.21 (s, 1H), 6.99 (d, *J* = 8.5 Hz, 1H), 6.75 (d, *J* = 8.5 Hz, 1H), 4.52 – 4.40 (m, 1H), 2.93 (dd, *J* = 15.3, 9.8 Hz, 1H), 2.77 (dd, *J* = 15.6, 5.5 Hz, 1H), 2.06 (s, 3H). <sup>13</sup>C NMR (126 MHz, CDCl<sub>3</sub>) δ 173.8, 160, 153.3, 137.5, 133.2, 128, 127, 122.2, 116.7, 101.8, 38.0, 29.4, 10.2.; HRMS (ESI<sup>+</sup>): *m/z* calculated for [C<sub>13</sub>H<sub>13</sub>ClN<sub>2</sub>O<sub>4</sub> + H]<sup>+</sup>: 297.06421; found: 297.0667.

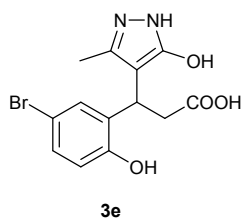

**3-(5-bromo-2-hydroxyphenyl)-3-(5-methyl-3-oxo-3H-pyrazol-4-yl) propanoic acid (3e)**

Pale white solid, yield: 92%; TLC (SiO<sub>2</sub>): R<sub>f</sub> = 0.57 (70% EtOAc/Hexanes); IR (neat): 3522, 3446, 3309, 2932, 2689, 1760, 1646, 1609, 1490, 1417, 1342, 1274, 1153, 1060, 1038, 951, 800, 684, 557 cm<sup>-1</sup>; <sup>1</sup>H NMR (500 MHz, DMSO) δ 7.89 (s, 2H), 7.37 (d, *J* = 8.4 Hz, 1H), 7.05 (s, 1H), 6.97 (d, *J* = 8.5 Hz, 1H), 4.29 – 4.13 (m, 1H), 3.21 – 3.15 (m, 1H), 2.85 – 2.79 (m, 1H), 2.07 (s, 3H). <sup>13</sup>C NMR (126 MHz, DMSO) δ 167.5, 167.3, 159.4, 150.2, 137.5, 131.8, 128.6, 127.1, 118.3, 98.6, 34.0, 28.9, 9.9.; HRMS (ESI<sup>+</sup>): *m/z* calculated for [C<sub>13</sub>H<sub>11</sub>BrN<sub>2</sub>O<sub>4</sub>+ H]<sup>+</sup>: 338.9980; found: 338.9980 .

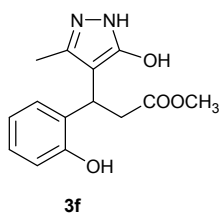

**methyl 3-(2-hydroxyphenyl)-3-(5-methyl-3-oxo-3H-pyrazol-4-yl) propanoate (3f)**

Pale white solid, yield: 92%; TLC (SiO<sub>2</sub>): R<sub>f</sub> = 0.50 (70% EtOAc/Hexanes); IR (neat): 3137, 3117, 2954, 1917, 1880, 1708, 1618, 1596, 1503, 1475, 1400, 1322, 1281, 1172, 1153, 1103, 1046, 982, 920, 910, 861, 850, 812 cm<sup>-1</sup>; <sup>1</sup>H NMR (500 MHz, DMSO) δ 7.23 (d, *J* = 7.3 Hz, 1H), 6.98 (t, *J* = 7.2 Hz, 1H), 6.79 (d, *J* = 7.7 Hz, 1H), 6.70 (t, *J* = 7.2 Hz, 1H), 4.55 – 4.44 (m, 1H), 3.56 (s, 3H), 3.28 (dd, *J* = 15.7, 9.9 Hz, 1H), 2.98 (dd, *J* = 15.8, 5.6 Hz, 1H), 2.17 (s, 3H). <sup>13</sup>C NMR (126 MHz, DMSO) δ 170.6, 166.2, 157.9, 149.7, 135.6, 126.3, 125.9, 124.4, 122.4, 114.5, 97.2, 50.1, 32.8, 27.4, 8.3.; HRMS (ESI<sup>+</sup>): *m/z* calculated for [C<sub>14</sub>H<sub>16</sub>N<sub>2</sub>O<sub>4</sub>+ H]<sup>+</sup>: 277.1188; found: 277.1188.

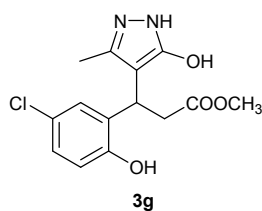

**methyl 3-(5-chloro-2-hydroxyphenyl)-3-(5-methyl-3-oxo-3H-pyrazol-4-yl) propanoate (3g)**

Pale white solid, yield: 90%; TLC (SiO<sub>2</sub>): R<sub>f</sub> = 0.62 (70% EtOAc/Hexanes); IR (neat): 3137, 3118, 2926, 2854, 1709, 1610, 1589, 1403, 1310, 1277, 1222, 1174, 986, 958, 923, 885, 875, 811, 789, 713 cm<sup>-1</sup>; <sup>1</sup>H NMR (500 MHz, DMSO) δ 7.23 (s, 1H), 6.91 (d, *J* = 8.4 Hz, 1H), 6.75 (d, *J* = 8.5 Hz, 1H), 4.51 (dd, *J* = 9.4, 5.6 Hz, 1H), 3.55 (s, 3H), 3.28 – 3.12 (m, 1H), 2.93 (d, *J* = 14.6 Hz, 1H), 2.17 (s, 3H). <sup>13</sup>C NMR (126 MHz, DMSO) δ 172.4, 160.7, 152.7, 137.7, 131.9, 127.5, 126.2, 123.1, 115.5, 101.6, 51.2, 36.9, 28.9, 9.9.; HRMS (ESI+): *m/z* calculated for [C<sub>14</sub>H<sub>15</sub>ClN<sub>2</sub>O<sub>4</sub>+ H]<sup>+</sup>: 311.0798; found: 311.0806.

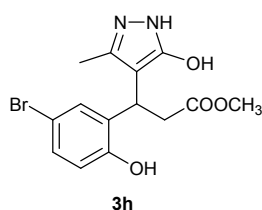

**methyl 3-(5-bromo-2-hydroxyphenyl)-3-(5-methyl-3-oxo-3H-pyrazol-4-yl) propanoate (3h)**

Pale white solid, yield: 93%; TLC (SiO<sub>2</sub>): R<sub>f</sub> = 0.63 (70% EtOAc/Hexanes); IR (neat): 3137, 3032, 2954, 1847, 1712, 1607, 1522, 1422, 1308, 1277, 1202, 1175, 1081, 1045, 985, 956, 919, 881, 810, 788, 712 cm<sup>-1</sup>; <sup>1</sup>H NMR (500 MHz, DMSO) δ 7.36 (s, 1H), 7.05 (d, *J* = 8.4 Hz, 1H), 6.71 (d, *J* = 8.5 Hz, 1H), 4.51 (dd, *J* = 9.5, 5.8 Hz, 1H), 3.55 (s, 3H), 3.17 (dd, *J* = 15.8, 10.0 Hz, 1H), 2.92 (dd, *J* = 15.7, 5.4 Hz, 1H), 2.16 (s, 3H). <sup>13</sup>C NMR (126 MHz, DMSO) δ 170.7, 159.0, 152.2, 136.6, 131.4, 129.4, 127.8, 115.7, 108.8, 100, 49.7, 35.5, 28.1, 8.7.; HRMS (ESI+): *m/z* calculated for [C<sub>14</sub>H<sub>15</sub>BrN<sub>2</sub>O<sub>4</sub>+ H]<sup>+</sup>: 355.0293; found: 355.0316.

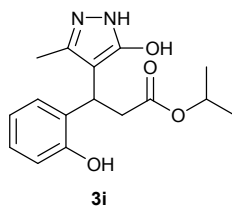

**isopropyl 3-(2-hydroxyphenyl)-3-(5-methyl-3-oxo-3H-pyrazol-4-yl) propanoate (3i)**

Pale white solid, yield: 96%; TLC (SiO<sub>2</sub>): R<sub>f</sub> = 0.56 (70% EtOAc/Hexanes); IR (neat): 3412, 3055, 2862, 2644, 1753, 1696, 1607, 1565, 1521, 1485, 1456, 1370, 1238, 1184, 1151, 1030, 817, 782, 754 cm<sup>-1</sup>; <sup>1</sup>H NMR (500 MHz, DMSO) δ 7.72 (s, 1H), 7.23 (d, *J* = 7.4 Hz, 1H), 6.97 (t, *J* = 7.3 Hz, 1H), 6.77 (d, *J* = 7.9 Hz, 1H), 6.70 (t, *J* = 7.2 Hz, 1H), 4.76 (d, *J* = 11.7, 5.7 Hz, 1H), 4.36 (dd, *J* = 9.0, 6.3 Hz, 1H), 3.19 (dd, *J* = 15.4, 9.6 Hz, 1H), 2.97 (dd, *J* = 15.1, 6.1 Hz, 1H), 2.19 (s, 3H), 1.09 (d, *J* = 6.2 Hz, 6H). <sup>13</sup>C NMR (126 MHz, CDCl<sub>3</sub>) δ 171.4, 160.9, 154.2, 138.2, 130, 128.2, 126.6, 118.6, 115.3, 102.3, 66.5, 37.4, 30.0, 25.1, 21.3, 10.2.; HRMS (ESI<sup>+</sup>): *m/z* calculated for [C<sub>16</sub>H<sub>18</sub>N<sub>2</sub>O<sub>4</sub> + H]<sup>+</sup>: 305.1501; found: 305.1518.

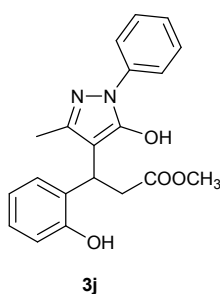

**Methyl 3-(2-hydroxyphenyl)-3-(5-methyl-3-oxo-2-phenyl-2,3-dihydro-1H-pyrazol-4-yl) propanoate (3j)**

Pale white solid, yield: 88%; TLC (SiO<sub>2</sub>): R<sub>f</sub> = 0.58 (80% EtOAc/Hexanes); IR (neat): 3137, 1765, 1619, 1497, 1455, 1402, 1314, 1279, 1215, 919, 832, 754 cm<sup>-1</sup>; <sup>1</sup>H NMR (500 MHz, CDCl<sub>3</sub>) δ 7.45 (d, *J* = 8.0 Hz, 2H), 7.30 – 7.19 (m, 2H), 7.12 – 7.08 (m, 3H), 6.93 (d, *J* = 7.9 Hz, 1H), 6.81 (t, *J* = 7.3 Hz, 1H), 4.30 (dd, *J* = 9.5, 5.0 Hz, 1H), 3.66-3.56 (m, 4H), 3.03 (dd, *J* = 17.0, 5.1 Hz, 1H), 2.32 (s, 3H). <sup>13</sup>C NMR (126 MHz, CDCl<sub>3</sub>) δ 173.4, 171.5, 168.6, 153.2,



151.5, 146.2, 135.7, 129.1, 129, 127.4, 126.2, 124.6, 120.5, 117.1, 60.5, 29.9, 21.2 14.2.;

HRMS (ESI+):  $m/z$  calculated for  $[C_{20}H_{20}N_2O_4 + H]^+$ : 353.1501; found: 353.1533.

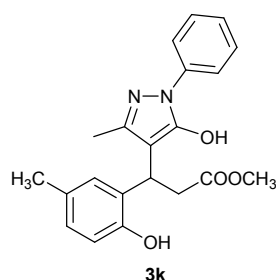

**methyl 3-(2-hydroxy-5-methylphenyl)-3-(5-methyl-3-oxo-2-phenyl-2,3-dihydro-1H-pyrazol-4-yl) propanoate (3k)**

Pale white solid, yield: 85%; TLC (SiO<sub>2</sub>):  $R_f$  = 0.6 (70% EtOAc/Hexanes); IR (neat): 3137, 1736, 1710, 1609, 1403, 1163, 1113, 988, 874, 813, 755, 690, 617 cm<sup>-1</sup>; <sup>1</sup>H NMR (500 MHz, CDCl<sub>3</sub>)  $\delta$  7.18 (d,  $J$  = 8.9 Hz, 2H), 7.04 – 6.95 (m, 2H), 6.88 (d,  $J$  = 6.5 Hz, 1H), 6.82 (d,  $J$  = 7.6 Hz, 2H), 6.68 (d,  $J$  = 7.6 Hz, 1H), 4.12 (dd,  $J$  = 8.8, 5.4 Hz, 1H), 3.50 (s, 3H), 3.41 (dd,  $J$  = 16.5, 9.2 Hz, 1H), 2.90 (dd,  $J$  = 16.8, 5.0 Hz, 1H), 2.16 (s, 6H). <sup>13</sup>C NMR (126 MHz, CDCl<sub>3</sub>)  $\delta$  173.7, 152.9, 146.2, 135.1, 130.7, 129.5, 129.0, 128.9, 126.4, 120.7, 119.6, 107.8, 60.7, 51.6, 35.0, 25.7, 20.6, 11.0.; HRMS (ESI+):  $m/z$  calculated for  $[C_{21}H_{22}N_2O_4 + H]^+$ : 367.1657; found: 367.1687.

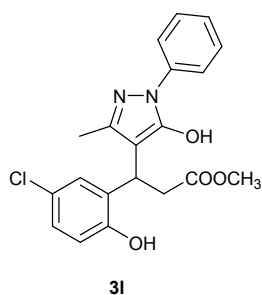

**methyl 3-(5-chloro-2-hydroxyphenyl)-3-(5-methyl-3-oxo-2-phenyl-2,3-dihydro-1H-pyrazol-4-yl) propanoate (3l)**

Pale white solid, yield: 83%; TLC (SiO<sub>2</sub>):  $R_f$  = 0.55 (80% EtOAc/Hexanes); IR (neat): 3137, 1959, 1864, 1736, 1603, 1594, 1558, 1498, 1458, 1308, 1250, 1026, 989, 904, 847, 826, 811, 785, 761, 744, 687, 667 cm<sup>-1</sup>; <sup>1</sup>H NMR (500 MHz, CDCl<sub>3</sub>)  $\delta$  7.27 (d,  $J$  = 6.5 Hz, 2H), 7.11 (t,  $J$  = 7.2 Hz, 2H), 7.05 (d,  $J$  = 5.4 Hz, 2H), 6.99 (t,  $J$  = 7.1 Hz, 1H), 6.80 (d,  $J$  = 9.1 Hz, 1H),

4.17 (dd,  $J = 8.9, 5.5$  Hz, 1H), 3.59 (s, 3H), 3.45 (dd,  $J = 16.8, 9.4$  Hz, 1H), 2.98 (dd,  $J = 16.9, 5.2$  Hz, 1H), 2.22 (s, 3H).  $^{13}\text{C}$  NMR (126 MHz,  $\text{CDCl}_3$ )  $\delta$  173.1, 154.2, 146.5, 135.1, 134.9, 131.1, 129.6, 129.0, 128.3, 126.7, 124.4, 121.1, 120.7, 51.9, 34.8, 22.6, 11.1.; HRMS (ESI+):  $m/z$  calculated for  $[\text{C}_{20}\text{H}_{19}\text{ClN}_2\text{O}_4 + \text{H}]^+$ : 387.1111; found: 387.1144.

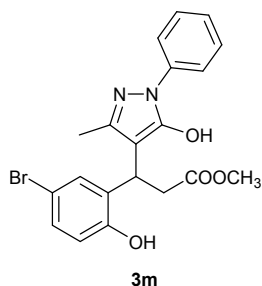

**Methyl 3-(5-bromo-2-hydroxyphenyl)-3-(5-methyl-3-oxo-2-phenyl-2,3-dihydro-1H-pyrazol-4-yl) propanoate (3m)**

Pale white solid, yield: 82%; TLC ( $\text{SiO}_2$ ):  $R_f = 0.54$  (70% EtOAc/Hexanes); IR (neat): 3136, 1735, 1605, 1572, 1497, 1403, 1304, 1272, 1247, 1165, 1109, 989, 862, 814, 753, 690  $\text{cm}^{-1}$ ;  $^1\text{H}$  NMR (500 MHz,  $\text{CDCl}_3$ )  $\delta$  7.45 (d,  $J = 8.1$  Hz, 2H), 7.31 – 7.25 (m, 2H), 7.21 (d,  $J = 6.7$  Hz, 2H), 7.13 (t,  $J = 7.3$  Hz, 1H), 6.82 (d,  $J = 9.1$  Hz, 1H), 4.21 (dd,  $J = 9.6, 4.8$  Hz, 1H), 3.62 (s, 3H), 3.59 (d,  $J = 9.7$  Hz, 1H), 2.99 (dd,  $J = 17.2, 4.7$  Hz, 1H), 2.34 (s, 3H).  $^{13}\text{C}$  NMR (126 MHz,  $\text{CDCl}_3$ )  $\delta$  173.2, 162.5, 155, 146.5, 135.0, 132.6, 131.7, 131.4, 129.1, 129.1, 126.8, 121.7, 120.8, 15.0, 111.7, 107.9, 52.2, 35.3, 11.2.; HRMS (ESI+):  $m/z$  calculated for  $[\text{C}_{20}\text{H}_{19}\text{BrN}_2\text{O}_4 + \text{H}]^+$ : 431.0606 ; found: 431.0642.

## General procedure for the synthesis of amides 5a-t

In a 5 mL round bottom flask containing a solution of coumarin 3-carboxylic acid **1** (1 mmol) in methyl-THF (4 mL) was added 5-methyl-2,4-dihydro-3H-pyrazol-3-one **2a** (1 mmol) and benzylamine (1 mmol), fixed the reflux condenser and stirred for 18 h maintaining at 65 °C temperature. The reaction mixture becomes homogeneous while the reaction is in progress. The progress of reaction was monitored by TLC. After completion of the reaction, the solid product **5a** filtered on sintered glass funnel and washed with water (2x10 mL), methanol (2x10 mL). The solid was collected was then dried in vacuum. The obtained product was pure and does not require any further purification.

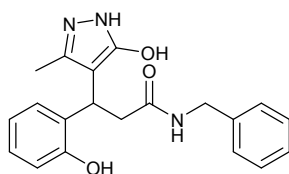

**5a**

### N-benzyl-3-(2-hydroxyphenyl)-3-(5-methyl-3-oxo-3H-pyrazol-4-yl) propenamide (**5a**)

Pale white solid, yield: 92%; TLC (SiO<sub>2</sub>): R<sub>f</sub> = 0.12 ( EtOAc); M.P.115-119° C; IR (neat): 3394, 3032, 2923, 1703, 1606, 1547, 1455, 1351, 1268, 1206, 1146, 1104, 1067, 1029, 931, 858, 751, 699 cm<sup>-1</sup>; <sup>1</sup>H NMR (500 MHz, DMSO) δ 8.24 (s, 1H), 7.33 (d, *J* = 7.2 Hz, 1H), 7.18 (dd, *J* = 17.3, 6.7 Hz, 4H), 6.95 (t, *J* = 10.5 Hz, 3H), 6.76 – 6.63 (m, 2H), 5.65 (s, 1H), 4.57 (d, *J* = 7.3 Hz, 1H), 4.18 (dd, *J* = 14.4, 4.9 Hz, 2H), 2.98 – 2.87 (m, 1H), 2.80 (dd, *J* = 14.0, 6.3 Hz, 1H), 2.05 (s, 3H). <sup>13</sup>C NMR (126 MHz, DMSO) δ 171, 161.2, 159.0, 154.3, 152.6, 139.4, 136.9, 130.9, 128, 126.7, 118.6, 115.1, 114.3, 106.8, 102.9, 100.5, 41.7, 29.4, 18.7, 10.2.; HRMS (ESI<sup>+</sup>): *m/z* calculated for [C<sub>20</sub>H<sub>21</sub>N<sub>3</sub>O<sub>3</sub>+ H]<sup>+</sup>: 352.1661; found: 352.1692 .

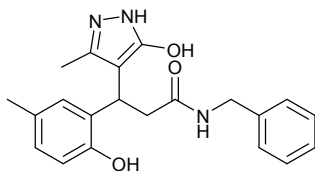

5b

**N-benzyl-3-(2-hydroxy-5-methylphenyl)-3-(5-methyl-3-oxo-3H-pyrazol-4-yl)propenamide (5b)**

Pale white solid, yield: 91%; TLC (SiO<sub>2</sub>): R<sub>f</sub> = 0.12 ( EtOAc); IR (neat): 3393, 3289, 3031, 2731, 1703, 1606, 1548, 1456, 1352, 1269, 1251, 1105, 1030, 930, 870, 795, 699, 685 cm<sup>-1</sup>; <sup>1</sup>H NMR (500 MHz, DMSO) δ 8.25 (s, 1H), 7.23 – 7.11 (m, 5H), 6.94 (d, *J* = 7.2 Hz, 2H), 6.76 (d, *J* = 7.8 Hz, 1H), 6.61 (d, *J* = 7.9 Hz, 1H), 5.83 (s, 1H), 4.53 (t, *J* = 7.4 Hz, 1H), 4.18 (d, *J* = 5.3 Hz, 2H), 2.87 (d, *J* = 8.9 Hz, 1H), 2.83 – 2.77 (m, 1H), 2.36 (s, 1H), 2.14 (s, 3H).; <sup>13</sup>C NMR (126 MHz, DMSO) δ 171.4, 161.36, 152.7, 139.6, 137, 130.8, 129.1, 128.1, 126.6, 115.2, 106.9, 103.1, 100.6, 41.8, 29.7, 20.6, 18.8, 11.4, 10.4.; HRMS (ESI+): *m/z* calculated for [C<sub>21</sub>H<sub>23</sub>N<sub>3</sub>O<sub>3</sub> + H]<sup>+</sup>: 366.1817; found: 366.1850 .

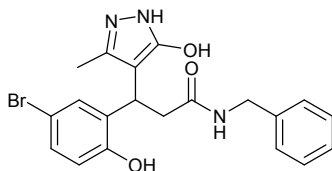

5c

**N-benzyl-3-(5-bromo-2-hydroxyphenyl)-3-(5-methyl-3-oxo-3H-pyrazol-4-yl)propenamide (5c)**

Pale white solid, yield: 95%; TLC (SiO<sub>2</sub>): R<sub>f</sub> = 0.12 ( EtOAc); IR (neat): 3402, 3070, 3030, 2951, 3225, 1702, 1647, 1606, 1551, 1433, 1454, 1301, 1080, 951, 871, 850, 752, 588 cm<sup>-1</sup>; <sup>1</sup>H NMR (500 MHz, DMSO) δ 8.26 (s, 1H), 7.49 (s, 1H), 7.22 (t, *J* = 7.4 Hz, 2H), 7.19 – 7.14 (m, 2H), 7.12 (d, *J* = 8.5 Hz, 1H), 6.95 (d, *J* = 7.2 Hz, 2H), 6.69 (d, *J* = 8.5 Hz, 1H), 5.83 (s, 1H), 4.56 (t, *J* = 7.6 Hz, 1H), 4.26 – 4.11 (m, 2H), 2.84 (d, *J* = 7.4 Hz, 2H), 2.06 (s, 3H). <sup>13</sup>C NMR (126 MHz, DMSO) δ 171, 161.4, 159, 152.7, 143.2, 139.6, 137, 133, 131.6, 128.8, 128.2,

126.6, 106.8, 100.6, 41.8, 29.4, 18.8, 11.4.; HRMS (ESI+):  $m/z$  calculated for  $[C_{20}H_{20}BrN_3O_3 + H]^+$ : 430.0766; found: 430.0800.

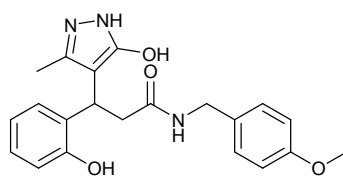

5d

**3-(2-hydroxyphenyl)-N-(4-methoxybenzyl)-3-(5-methyl-3-oxo-3H-pyrazol-4-yl)propenamide (5d)**

Pale white solid, yield: 91%; TLC (SiO<sub>2</sub>):  $R_f$  = 0.12 ( EtOAc); IR (neat): 3521, 3628, 3413, 3351, 3307, 2938, 2833, 2727, 1602, 1556, 1519, 1453, 1320, 1286, 1145, 1032, 947, 864, 799, 659 cm<sup>-1</sup>; <sup>1</sup>H NMR (500 MHz, DMSO)  $\delta$  8.09 (s, 1H), 7.30 (d,  $J$  = 7.4 Hz, 1H), 6.95 (t,  $J$  = 7.5 Hz, 1H), 6.85 (d,  $J$  = 7.9 Hz, 2H), 6.78 – 6.72 (m, 3H), 6.68 (t,  $J$  = 7.3 Hz, 1H), 4.56 (t,  $J$  = 7.4 Hz, 1H), 4.19 (dd,  $J$  = 15.1, 5.7 Hz, 1H), 4.08 (dd,  $J$  = 15.1, 5.4 Hz, 1H), 3.72 (s, 3H), 2.97 (dd,  $J$  = 13.5, 9.6 Hz, 1H), 2.80 (dd,  $J$  = 14.1, 6.1 Hz, 1H), 2.08 (s, 3H). <sup>13</sup>C NMR (126 MHz, DMSO)  $\delta$  171.6, 160.7, 158, 154.5, 131.3, 130.9, 127.9, 118.7, 115.4, 113.5, 103, 55.0, 41.5, 29.9, 10.3.; HRMS (ESI+):  $m/z$  calculated for  $[C_{21}H_{23}N_3O_4 + H]^+$ : 382.1766; found: 382.1799.

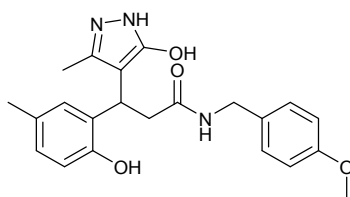

5e

**3-(2-hydroxy-5-methylphenyl)-N-(4-methoxybenzyl)-3-(5-methyl-3-oxo-3H-pyrazol-4-yl)propenamide (5e)**

Pale white solid, yield: 89%; TLC (SiO<sub>2</sub>):  $R_f$  = 0.12 (EtOAc); IR (neat): 3475, 3555, 2921, 2580, 1596, 1515, 1438, 1370, 1177, 11123, 995, 846, 878, 814, 747 cm<sup>-1</sup>; <sup>1</sup>H NMR (500 MHz, DMSO)  $\delta$  8.16 (s, 1H), 7.11 (s, 1H), 6.87 (d,  $J$  = 7.7 Hz, 2H), 6.81 – 6.73 (m, 3H), 6.61 (d,  $J$  = 7.9 Hz, 1H), 4.53 (t,  $J$  = 7.3 Hz, 1H), 4.19 – 4.03 (m, 2H), 3.70 (s, 3H), 2.88 (dd,  $J$  = 13.9, 9.1

Hz, 1H), 2.77 (dd,  $J = 14.1, 6.4$  Hz, 1H), 2.13 (s, 3H), 2.04 (s, 3H).;  $^{13}\text{C}$  NMR (126 MHz, DMSO)  $\delta$  171.3, 160.3, 157.9, 152.1, 131.5, 130.8, 129.1, 127.9, 126.8, 126.8, 126.2, 115.2, 113.5, 103.0, 55.1, 41.3, 29.7, 20.6, 10.4.; HRMS (ESI+):  $m/z$  calculated for  $[\text{C}_{22}\text{H}_{25}\text{N}_3\text{O}_4 + \text{H}]^+$ : 396.1923; found: 396.1959.

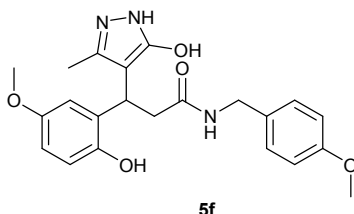

**3-(2-hydroxy-5-methoxyphenyl)-N-(4-methoxybenzyl)-3-(5-methyl-3-oxo-3H-pyrazol-4-yl)propenamide (3f)**

Pale white solid, yield: 85%; TLC ( $\text{SiO}_2$ ):  $R_f = 0.12$  (EtOAc); IR (neat): 3535, 3445, 3270, 3074, 2928, 2834, 1607, 1559, 1537, 1513, 1502, 1463, 1451, 1366, 1342, 1244, 1147, 1112, 1014, 827, 812, 745, 686, 614  $\text{cm}^{-1}$ ;  $^1\text{H}$  NMR (500 MHz, DMSO)  $\delta$  8.20 (s, 1H), 6.95 (s, 1H), 6.87 (d,  $J = 8.0$  Hz, 2H), 6.76 (d,  $J = 7.9$  Hz, 2H), 6.64 (d,  $J = 8.6$  Hz, 1H), 6.55 (d,  $J = 7.5$  Hz, 1H), 4.54 (t,  $J = 7.7$  Hz, 1H), 4.18 – 4.03 (m, 2H), 3.70 (s, 3H), 3.61 (s, 3H), 2.85 (dd,  $J = 13.8, 9.2$  Hz, 1H), 2.78 (dd,  $J = 14.2, 6.9$  Hz, 1H), 2.05 (s, 3H).;  $^{13}\text{C}$  NMR (126 MHz, DMSO)  $\delta$  171.3, 160.3, 158.0, 152.1, 148.2, 137.5, 132.1, 131.5, 128.0, 115.5, 114.9, 113.6, 110.9, 102.9, 55.2, 55.1, 41.6, 29.7, 14.02, 10.8.; HRMS (ESI+):  $m/z$  calculated for  $[\text{C}_{22}\text{H}_{25}\text{N}_3\text{O}_5 + \text{H}]^+$ : 412.1872; found: 412.1920 .

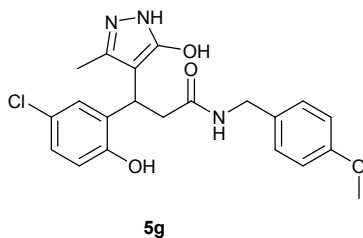

**3-(5-chloro-2-hydroxyphenyl)-N-(4-methoxybenzyl)-3-(5-methyl-3-oxo-3H-pyrazol-4-yl)propanamide (5g)**

Pale white solid, yield: 86%; TLC (SiO<sub>2</sub>): R<sub>f</sub> = 0.12 ( EtOAc); IR (neat): 3519, 3422, 3331, 2835, 2924, 1734, 1610, 1563, 1513, 1422, 1354, 1304, 1274, 1254, 1114, 948, 816 cm<sup>-1</sup>; <sup>1</sup>H NMR (500 MHz, DMSO) δ 8.22 (s, 1H), 7.33 (s, 1H), 7.00 (d, *J* = 8.5 Hz, 1H), 6.88 (d, *J* = 7.9 Hz, 1H), 6.78 (d, *J* = 7.5 Hz, 2H), 6.73 (d, *J* = 78.4 Hz, 1H), 4.54 (t, *J* = 7.5 Hz, 1H), 4.11 (d, *J* = 5.3 Hz, 2H), 3.71 (s, 3H), 2.81 (d, *J* = 7.6 Hz, 2H), 2.06 (s, 3H). <sup>13</sup>C NMR (126 MHz, DMSO) δ 171, 160.2, 158.0, 153.5, 137.5, 133.2, 131.5, 128.2, 127.9, 126.2, 122.2, 116.7, 113.6, 102.2, 55.1, 41.3, 38.9, 29.5, 10.3.; HRMS (ESI<sup>+</sup>): *m/z* calculated for [C<sub>21</sub>H<sub>22</sub>ClN<sub>3</sub>O<sub>4</sub>+ H]<sup>+</sup>: 416.137709; found: 416.1411.

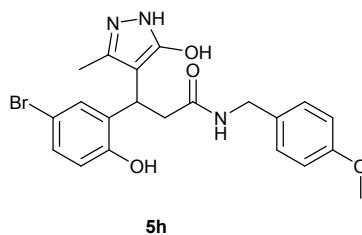

**3-(5-bromo-2-hydroxyphenyl)-N-(4-methoxybenzyl)-3-(5-methyl-3-oxo-3H-pyrazol-4-yl)propanamide (5h)**

Pale white solid, yield: 88%; TLC (SiO<sub>2</sub>): R<sub>f</sub> = 0.12 ( EtOAc); IR (neat): 3607, 3520, 3443, 3319, 2572, 1648, 1628, 1595, 1514, 1459, 1274, 1174, 950, 819 cm<sup>-1</sup>; <sup>1</sup>H NMR (500 MHz, DMSO) δ 8.23 (s, 1H), 7.46 (s, 1H), 7.12 (d, *J* = 7.6 Hz, 1H), 6.88 (d, *J* = 7.8 Hz, 2H), 6.78 (d, *J* = 8.0 Hz, 2H), 6.69 (d, *J* = 8.3 Hz, 1H), 4.54 (t, *J* = 7 Hz 1H), 4.11 (d, *J* = 4.8 Hz, 2H), 3.71 (s, 3H), 2.81 (d, *J* = 7.1 Hz, 2H), 2.06 (s, 3H). <sup>13</sup>C NMR (126 MHz, DMSO) δ 171.0, 160.3, 158.0, 153.9, 153.4, 137.6, 133.8, 131.5, 131.0, 129.2, 128, 117.3, 113.7, 110.1, 102.3, 55.1, 41.4, 38.9, 29.5, 10.3.; HRMS (ESI<sup>+</sup>): *m/z* calculated for [C<sub>21</sub>H<sub>22</sub>BrN<sub>3</sub>O<sub>4</sub>+ H]<sup>+</sup>: 460.0871; found: 460.0903.

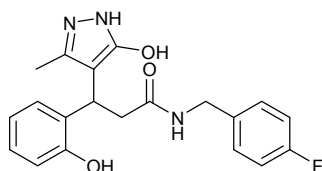

5i

**N-(4-fluorobenzyl)-3-(2-hydroxyphenyl)-3-(5-methyl-3-oxo-3H-pyrazol-4-yl)propenamide (5i)**

Pale white solid, yield: 85%; TLC (SiO<sub>2</sub>): R<sub>f</sub> = 0.12 ( EtOAc); IR (neat): 3388, 3334, 3075, 2976, 2894, 2753, 1640, 1597, 1542, 1510, 1405, 1361, 1339, 1252, 1157, 1045, 942, 849, 831, 806, 712, 648 cm<sup>-1</sup>; <sup>1</sup>H NMR (500 MHz, DMSO) δ 8.25 (s, 1H), 7.33 (d, *J* = 7.4 Hz, 1H), 7.04 – 6.89 (m, 6H), 6.75 – 6.66 (m, 2H), 4.57 (t, *J* = 7.5 Hz, 1H), 4.21 (dd, *J* = 15.2, 5.7 Hz, 1H), 4.10 (dd, *J* = 15.3, 5.3 Hz, 1H), 2.90 (dd, *J* = 13.4, 9.5 Hz, 1H), 2.77 (dd, *J* = 13.8, 6.2 Hz, 1H), 2.05 (s, 3H).; <sup>13</sup>C NMR (126 MHz, DMSO) δ 171.28, 161.79, 160.24, 159.87, 154.28, 135.68, 135.66, 130.79, 128.48, 128.39, 128.32, 126.42, 118.54, 115.04, 114.74, 114.57, 102.66, 40.96, 29.45, 10.18.; HRMS (ESI+): *m/z* calculated for [C<sub>20</sub>H<sub>20</sub>FN<sub>3</sub>O<sub>3</sub>+ H]<sup>+</sup>: 370.1566; found: 370.1591.

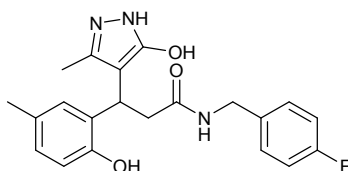

5j

**N-(4-fluorobenzyl)-3-(2-hydroxy-5-methylphenyl)-3-(5-methyl-3-oxo-3H-pyrazol-4-yl)propenamide (5j)**

Pale white solid, yield: 89%; TLC (SiO<sub>2</sub>): R<sub>f</sub> = 0.12 ( EtOAc); IR (neat): 3301, 2924, 1607, 1537, 1514, 1443, 1342, 1252, 1216, 1158, 1105, 1027, 822, 698 cm<sup>-1</sup>; <sup>1</sup>H NMR (500 MHz, DMSO) δ 8.23 (s, 1H), 7.12 (s, 1H), 7.01 (t, *J* = 8.7 Hz, 2H), 6.94 – 6.90 (m, 2H), 6.76 (d, *J* = 7.6 Hz, 1H), 6.61 (d, *J* = 8.0 Hz, 1H), 4.52 (t, *J* = 7.5 Hz, 1H), 4.19 (dd, *J* = 15.5, 5.6 Hz, 1H), 4.12 (dd, *J* = 15.5, 5.6 Hz, 1H), 2.89 (dd, *J* = 13.6, 9.5 Hz, 1H), 2.77 (dd, *J* = 14.0, 6.6 Hz, 1H), 2.05 (s, 3H).



2.13 (s, 3H).  $^{13}\text{C}$  NMR (126 MHz, DMSO)  $\delta$  171.5, 161.9, 160.4, 160.0, 152.1, 135.8, 135.8, 130.7, 129.0, 128.3, 126.9, 125.4, 114.8, 114.7, 103.0, 41.1, 29.8, 21.1, 20.6, 10.3. HRMS (ESI+):  $m/z$  calculated for  $[\text{C}_{21}\text{H}_{22}\text{FN}_3\text{O}_3 + \text{H}]^+$ : 384.1723; found: 384.1757.

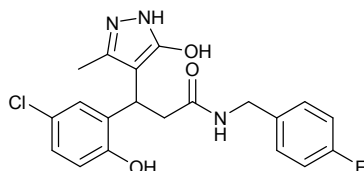

5k

**3-(5-chloro-2-hydroxyphenyl)-N-(4-fluorobenzyl)-3-(5-methyl-3-oxo-3H-pyrazol-4-yl)propenamide (5k)**

Pale white solid, yield: 84%; TLC ( $\text{SiO}_2$ ):  $R_f = 0.12$  (EtOAc); IR (neat): 3776, 3530, 3448, 3301, 1756, 1628, 1596, 1513, 1341, 1235, 1113, 953, 852, 822, 650  $\text{cm}^{-1}$ ;  $^1\text{H}$  NMR (500 MHz, DMSO)  $\delta$  8.34 (d,  $J = 5.2$  Hz, 1H), 7.40 – 7.31 (m, 1H), 7.07 – 6.91 (m, 5H), 6.76 (d,  $J = 8.4$  Hz, 1H), 4.58 (t,  $J = 7.7$  Hz, 1H), 4.24–4.10 (m, 1H), 2.87 (dd,  $J = 20.7, 6.3$  Hz, 2H), 2.08 (s, 3H).  $^{13}\text{C}$  NMR (126 MHz, DMSO)  $\delta$  171.0, 167.5, 161.8, 160.2, 153.4, 150.2, 137.5, 135.6, 132.9, 128.3, 126.1, 122.1, 118.2, 116.5, 114.8, 101.9, 98.6, 41.0, 34.0, 29.4, 10.1. HRMS (ESI+):  $m/z$  calculated for  $[\text{C}_{20}\text{H}_{19}\text{ClFN}_3\text{O}_3 + \text{H}]^+$ : 404.1177; found: 404.1205.

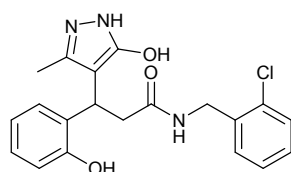

5l

**N-(4-chlorobenzyl)-3-(2-hydroxyphenyl)-3-(5-methyl-3-oxo-3H-pyrazol-4-yl)propenamide (5l)**

Pale white solid, yield: 85%; TLC ( $\text{SiO}_2$ ):  $R_f = 0.12$  (EtOAc); IR (neat): 3519, 3330, 3064, 2951, 2887, 2843, 1642, 1595, 1514, 1412, 1390, 1254, 1219, 1102, 999, 910, 875, 822, 806, 752, 668  $\text{cm}^{-1}$ ;  $^1\text{H}$  NMR (500 MHz, DMSO)  $\delta$  7.79 (s, 1H), 7.71 (s, 1H), 7.27 (d,  $J = 5.9$  Hz, 2H), 7.14 – 7.06 (m, 2H), 7.02 (t,  $J = 7.0$  Hz, 1H), 6.80 (d,  $J = 7.8$  Hz, 1H), 6.77 – 6.65 (m,

2H), 4.52 (dd,  $J = 10.9, 4.2$  Hz, 1H), 4.38 (dd,  $J = 16.2, 5.8$  Hz, 1H), 4.28 (dd,  $J = 16.0, 5.2$  Hz, 1H), 3.23 (dd,  $J = 13.5, 9.0$  Hz, 1H), 3.02 (dd,  $J = 13.8, 6.7$  Hz, 1H), 2.12 (s, 3H);  $^{13}\text{C}$  NMR (126 MHz, DMSO)  $\delta$  171.77, 160.60, 154.32, 138.00, 136.12, 131.55, 130.69, 128.49, 127.67, 127.59, 126.79, 126.41, 119.13, 118.57, 115.34, 102.80, 29.99, 10.13.; HRMS (ESI+):  $m/z$  calculated for  $[\text{C}_{20}\text{H}_{20}\text{ClN}_3\text{O}_3 + \text{H}]^+$ : 386.1271; found: 386.1302.

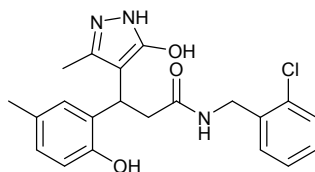

**5m, 89%**

**N-(4-chlorobenzyl)-3-(2-hydroxy-5-methylphenyl)-3-(5-methyl-3-oxo-3H-pyrazol-4-yl)propenamide (5m)**

Pale white solid, yield: 89%; TLC ( $\text{SiO}_2$ ):  $R_f = 0.12$  ( EtOAc); IR (neat): 3625, 3521, 3315, 2580, 1652, 1627, 1598, 1342, 1256, 1106, 1054, 756  $\text{cm}^{-1}$ ;  $^1\text{H}$  NMR (500 MHz, DMSO)  $\delta$  8.28 (s, 1H), 7.36 (d,  $J = 7.8$  Hz, 1H), 7.21 (t,  $J = 7.0$  Hz, 1H), 7.20 – 7.08 (m, 2H), 6.77 (d,  $J = 7.8$  Hz, 1H), 6.66 (d,  $J = 7.5$  Hz, 1H), 6.62 (d,  $J = 7.9$  Hz, 1H), 4.53 (t,  $J = 7.5$  Hz, 1H), 4.27 – 4.13 (m, 2H), 2.91 (dd,  $J = 14.1, 9.1$  Hz, 1H), 2.84 (dd,  $J = 13.8, 6.7$  Hz, 1H), 2.15 (s, 3H), 2.04 (s, 3H);  $^{13}\text{C}$  NMR (126 MHz, DMSO)  $\delta$  171.7, 160.4, 152.1, 137.6, 136.4, 131.6, 130.7, 129.1, 128.8, 128.2, 127.8, 127.1, 126.9, 115.2, 103.0, 40.0, 39.0, 29.7, 20.7, 10.9.; HRMS (ESI+):  $m/z$  calculated for  $[\text{C}_{21}\text{H}_{22}\text{ClN}_3\text{O}_3 + \text{H}]^+$ : 400.1427; found: 400.1453 .

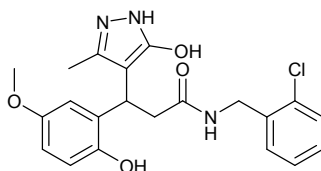

**5n**

**N-(4-chlorobenzyl)-3-(2-hydroxy-5-methoxyphenyl)-3-(5-methyl-3-oxo-3H-pyrazol-4-yl)propenamide (5n)**

Pale white solid, yield: 88%; TLC (SiO<sub>2</sub>): R<sub>f</sub> = 0.12 (EtOAc); IR (neat): 2932, 2836, 1760, 1646, 1604, 1539, 1506, 1342, 1270, 947, 875, 792, 756, 700, 565 cm<sup>-1</sup>.; <sup>1</sup>H NMR (500 MHz, DMSO) δ 8.31 (s, 1H), 7.37 (d, *J* = 7.3 Hz, 1H), 7.22 (d, *J* = 7.0 Hz, 1H), 7.15 (d, *J* = 6.9 Hz, 1H), 7.03 (s, 1H), 6.77 – 6.51 (m, 3H), 4.58 (s, 1H), 4.30-4.15 (m, 2H), 3.64 (s, 3H), 2.94 (d, *J* = 13.6, 8.8 Hz, 1H), 2.87 (dd, *J* = 13.6, 6.0 Hz, 1H), 2.07 (s, 3H).; <sup>13</sup>C NMR (126 MHz, DMSO) δ 171.4, 160.2, 155.7, 151.9, 147.9, 136.6, 131.9, 131.5, 129.0, 128.3, 127.9, 127.0, 115.7, 114.9, 111.0, 102.9, 56.0, 34.6, 29.7, 29.2, 10.4.; HRMS (ESI+): *m/z* calculated for [C<sub>21</sub>H<sub>22</sub>ClN<sub>3</sub>O<sub>4</sub>+ H]<sup>+</sup>: 416.1377; found: 416.1408 .

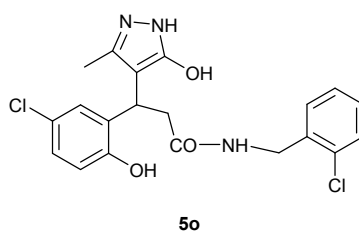

**3-(5-chloro-2-hydroxyphenyl)-N-(4-chlorobenzyl)-3-(5-methyl-3-oxo-3H-pyrazol-4-yl)propenamide (5o)**

Pale white solid, yield: 89%; TLC (SiO<sub>2</sub>): R<sub>f</sub> = 0.12 (EtOAc); IR (neat): 3606, 3521, 2928, 2572, 1734, 1608, 1539, 1519, 1492, 1460, 1446, 1274, 1113, 1038, 950, 801, 751, 649 cm<sup>-1</sup>.; <sup>1</sup>H NMR (500 MHz, DMSO) δ 8.37 (s, 1H), 7.40 (s, 1H), 7.37 (d, *J* = 7.7 Hz, 1H), 7.22 (t, *J* = 7.3 Hz, 1H), 7.15 (t, *J* = 7.2 Hz, 1H), 7.01 (d, *J* = 8.3 Hz, 1H), 6.73 (dd, *J* = 15.2, 8.0 Hz, 2H), 4.56 (t, *J* = 7.5 Hz, 1H), 4.21 (d, *J* = 4.7 Hz, 2H), 2.89 (d, *J* = 7.4 Hz, 2H), 2.06 (s, 3H).; <sup>13</sup>C NMR (126 MHz, DMSO) δ 171.3, 160.2, 153.4, 137.3, 137.0, 136.3, 133.1, 131.6, 128.8, 128.2, 127.7, 127.1, 126.2, 122.1, 116.6, 102.0, 29.4, 10.2. HRMS (ESI+): *m/z* calculated for [C<sub>20</sub>H<sub>19</sub>Cl<sub>2</sub>N<sub>3</sub>O<sub>3</sub>+ H]<sup>+</sup>: 420.0881; found: 420.0910.

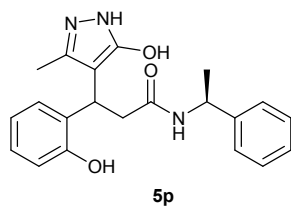

**3-(2-hydroxyphenyl)-3-(5-methyl-3-oxo-3H-pyrazol-4-yl)-N-((R)-1-phenylethyl)propanamide (5p)**

Pale white solid, yield: 87%; TLC (SiO<sub>2</sub>): R<sub>f</sub> = 0.12 ( EtOAc); IR (neat): 3388, 3350, 3071, 3026, 2735, 1733, 1639, 1598, 1520, 1455, 1401, 1362, 1343, 1311, 1281, 1218, 1182, 1022, 910, 833, 698 cm<sup>-1</sup>; <sup>1</sup>H NMR (500 MHz, DMSO) δ 7.75 (s, 1H), 7.28 (t, *J* = 8.1 Hz, 1H), 7.24 – 7.16 (m, 2H), 7.13 (dd, *J* = 11.8, 6.5 Hz, 1H), 7.09 (d, *J* = 7.4 Hz, 1H), 7.01 (d, *J* = 7.5 Hz, 1H), 6.97 (t, *J* = 7.5 Hz, 1H), 6.77 (t, *J* = 8.2 Hz, 1H), 6.69 (t, *J* = 7.3 Hz, 1H), 4.88 (dd, *J* = 13.9, 6.9 Hz, 1H), 4.51 (dd, *J* = 15.5, 7.2 Hz, 1H), 3.16 (dd, *J* = 13.7, 9.5 Hz, 0.5H), 3.05 (dd, *J* = 13.7, 8.8 Hz, 0.5H), 2.94 (dd, *J* = 14.0, 7.0 Hz, 0.5H), 2.84 (dd, *J* = 13.9, 5.9 Hz, 0.5H), 2.11 (s, 1.3H), 2.05 (s, 1.3H), 1.30 (d, *J* = 6.8 Hz, 1.37H), 1.24 (d, *J* = 6.8 Hz, 1.37H).; <sup>13</sup>C NMR (126 MHz, DMSO) δ 171.2, 161.2, 154.3, 143.9, 139.1, 130.8, 128.7, 127.9, 126.6, 126.2, 125.6, 125.4, 118.9, 116.0, 103.3, 47.8, 31.0, 21.8, 10.1.; HRMS (ESI+): *m/z* calculated for [C<sub>21</sub>H<sub>23</sub>N<sub>3</sub>O<sub>3</sub> + H]<sup>+</sup>: 366.1817; found: 366.1850.

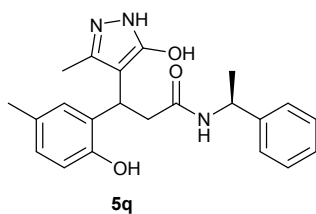

**3-(2-hydroxy-5-methylphenyl)-3-(5-methyl-3-oxo-3H-pyrazol-4-yl)-N-((R)-1-phenylethyl)propanamide (5q)**

Pale white solid, yield: 89%; TLC (SiO<sub>2</sub>): R<sub>f</sub> = 0.12 ( EtOAc); IR (neat): 3394, 3279, 2927, 2578, 1607, 1533, 1519, 1450, 1277, 1154, 1064, 951, 897, 822, 699, 623 cm<sup>-1</sup>; <sup>1</sup>H NMR (500 MHz, DMSO) δ 8.16 (d, *J* = 7.7 Hz, 0.42H), 8.09 (d, *J* = 7.4 Hz, 0.39H), 7.26 – 6.99 (m, 7H), 6.74 (d, *J* = 7.2 Hz, 1H), 6.60 (dd, *J* = 17.6, 7.8 Hz, 1H), 4.87 – 4.70 (m, 1H), 4.48 (d, *J* = 6.9

Hz, 1H), 2.99 – 2.85 (m, 1H), 2.79 (DD,  $J = 13.9, 8.0$  Hz, 0.5H), 2.72 (dd,  $J = 13.9, 6.1$  Hz, 0.5H), 2.15 (s, 3H), 2.01 (d,  $J = 25$  Hz, 1H), 1.24 (d,  $J = 7$  Hz 3H).  $^{13}\text{C}$  NMR (126 MHz, DMSO)  $\delta$  170.5, 160.3, 152.0, 144.8, 144.5, 137.6, 130.8, 129.0, 128.0, 126.7, 126.2, 125.7, 125.6, 115.1, 103.3, 103.0, 47.5, 29.7, 22.0, 20.5, 10.3.; HRMS (ESI+):  $m/z$  calculated for  $[\text{C}_{22}\text{H}_{25}\text{N}_3\text{O}_3 + \text{H}]^+$ : 380.1974; found: 380.2012 .

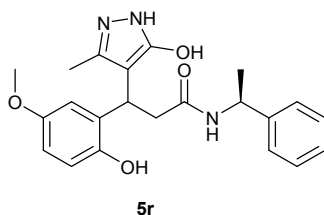

**3-(2-hydroxy-5-methoxyphenyl)-3-(5-methyl-3-oxo-3H-pyrazol-4-yl)-N-((R)-1-phenylethyl) propenamide (5r)**

Pale white solid, yield: 85%; TLC ( $\text{SiO}_2$ ):  $R_f = 0.12$  ( EtOAc); IR (neat): 3607, 3522, 3300, 2930, 2830, 1646, 1625, 1533, 1514, 1451, 1430, 1366, 1299, 1165, 1058, 1036, 951, 911, 862, 759, 700  $\text{cm}^{-1}$ ;  $^1\text{H}$  NMR (500 MHz, DMSO)  $\delta$  8.15 (d,  $J = 7.9$  Hz, 0.42H), 8.09 (d,  $J = 7.1$  Hz, 0.5H) 7.26 – 7.13 (m, 3H), 7.10 (d,  $J = 6.8$  Hz, 1H), 7.05 (d,  $J = 6.9$  Hz, 1H), 6.99 (s, 1H), 6.95 (s, 1H), 6.62 (dd,  $J = 17.3, 8.3$  Hz, 1H), 6.53 (d,  $J = 8.1$  Hz, 1H), 4.79 (s, 1H), 4.49 (d,  $J = 6.0$  Hz, 1H), 3.62 (s, 3H), 2.95 – 2.84 (m, 1H), 2.82 – 2.69 (m, 1H), 2.04 (s, 1.27H), 1.99 (s, 1.21H), 1.24 (s, 3H).  $^{13}\text{C}$  NMR (126 MHz, DMSO)  $\delta$  170.4, 160.2, 151.9, 148.0, 144.7, 144.6, 137.3, 132.1, 128.0, 126.2, 125.7, 115.4, 114.7, 110.9, 103.1, 55.1, 47.5, 29.6, 22.3, 10.2.; HRMS (ESI+):  $m/z$  calculated for  $[\text{C}_{22}\text{H}_{25}\text{N}_3\text{O}_4 + \text{H}]^+$ : 396.1923; found: 396.1956.

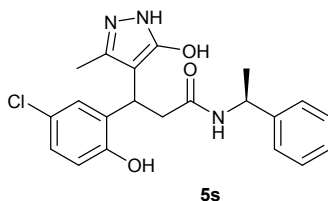

**3-(5-chloro-2-hydroxyphenyl)-3-(5-methyl-3-oxo-3H-pyrazol-4-yl)-N-((R)-1-phenylethyl) propenamide (5s)**

Pale white solid, yield: 83%; TLC (SiO<sub>2</sub>): R<sub>f</sub> = 0.12 ( EtOAc); IR (neat): 3222, 2931, 2575, 1735, 1608, 1595, 1518, 1494, 1419, 1353, 1272, 1114, 978, 951, 920, 823, 754, 697, 605 cm<sup>-1</sup>; <sup>1</sup>H NMR (500 MHz, DMSO) δ 8.26 (d, *J* = 7.7 Hz, 0.4H), 8.16 (d, *J* = 7.5 Hz, 0.38H), 7.41 (s, 0.55H), 7.35 (s, 0.45H), 7.26-7.17 (m, 2H), 7.16 – 7.13 (m, 1H), 7.11 (d, *J* = 7.3 Hz, 1H), 7.06 (d, *J* = 7.1 Hz, 1H), 6.98 (d, *J* = 8.1 Hz, 1H), 6.73 (d, *J* = 8.4 Hz, 0.5H), 6.68 (d, *J* = 8.4 Hz, 0.5H), 4.79 (s, 1H), 4.50 (s, 1H), 2.97 (dd, *J* = 14.2, 8.5 Hz, 0.5 H), 2.85 (dd, *J* = 13.9, 8.6 Hz, 0.5H), 2.77 (dd, *J* = 14.1, 7.0 Hz, 0.5H), 2.71 (dd, *J* = 14.3, 7.5 Hz, 0.5H), 2.06 (s, 1.21H), 2.00 (s, 1.26H), 1.24 (s, 3H).; <sup>13</sup>C NMR (126 MHz, DMSO) δ 170.1, 160.1, 153.3, 144.8, 144.5, 137.3, 133.1, 128.0, 126.2, 125.6, 122.0, 116.5, 116.4, 102.5, 47.5, 29.4, 29.0, 22.6, 22.5, 10.1.; HRMS (ESI<sup>+</sup>): *m/z* calculated for [C<sub>21</sub>H<sub>22</sub>ClN<sub>3</sub>O<sub>3</sub>+ H]<sup>+</sup>: 400.1427; found: 400.1465.

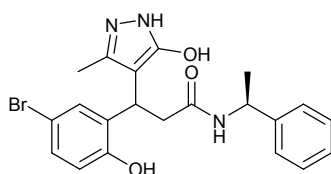

5t

**3-(5-bromo-2-hydroxyphenyl)-3-(5-methyl-3-oxo-3H-pyrazol-4-yl)-N-((R)-1-phenylethyl)propenamide (5t)**

Pale white solid, yield: 88%; TLC (SiO<sub>2</sub>): R<sub>f</sub> = 0.12 ( EtOAc); IR (neat): 3936, 3501, 3436, 3401, 2634, 2573, 1950, 1880, 1806, 1607, 1594, 1537, 1373, 1300, 1239, 1167, 1078, 1024, 1013, 909, 801, 763, 720, 697 cm<sup>-1</sup>; <sup>1</sup>H NMR (500 MHz, DMSO) δ 8.26 (d, *J* = 7.5 Hz, 0.38H), 8.17 (d, *J* = 7.4 Hz, 0.34H), 7.53 (s, 0.43H), 7.47 (s, 0.41H), 7.30-7.02 (m, 7H), 6.69 (d, *J* = 8.4 Hz, 0.5H), 6.64 (d, *J* = 8.3 Hz, 0.35H), 4.79 (s, 0.5H), 4.50 (s, 0.5H), 2.96 (dd, *J* = 13.7, 8.5 Hz, 0.5H), 2.84 (dd, *J* = 11.7, 7.8 Hz, 0.5H), 2.80– 2.67 (m, 1H), 2.06 (s, 1.5H), 2.00 (s, 1.5H), 1.25 (s, 3H).; <sup>13</sup>C NMR (126 MHz, DMSO) δ 170.1, 160.1, 144.8, 144.5, 137.4, 137.2, 133.7, 130.9, 129.9, 129.0, 128.0, 126.2, 125.6, 110.0, 102.5, 47.6, 29.4, 22.6, 10.1.; HRMS (ESI<sup>+</sup>): *m/z* calculated for [C<sub>21</sub>H<sub>22</sub>BrN<sub>3</sub>O<sub>3</sub>+ H]<sup>+</sup>: 444.092277; found: 444.0954.

1. Goutam Brahmachari, *ACS Sustainable Chem. Eng.* 2015, **3**, 9, 2350.

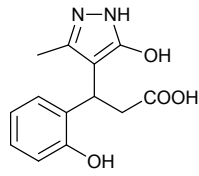

3a

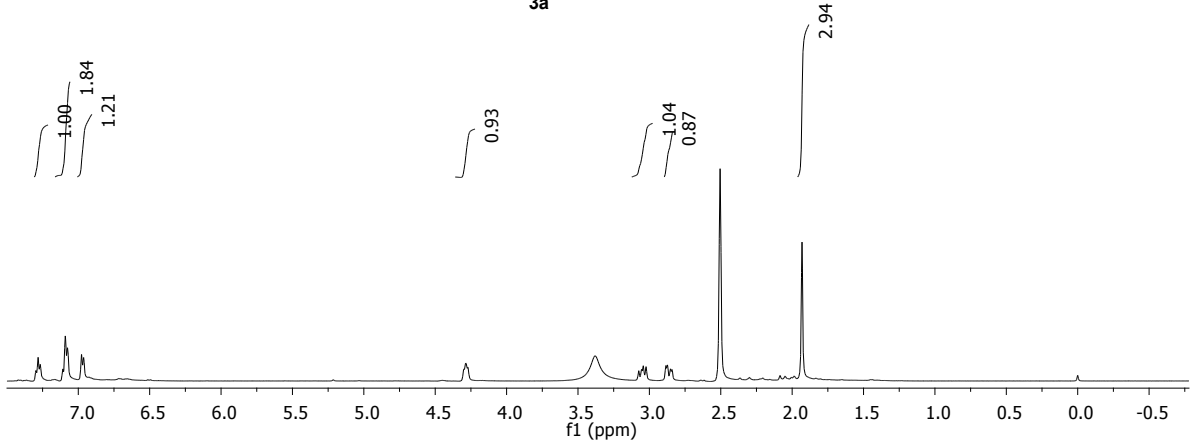

Shanta Raj  
 RC-SRL-CH348-01  
 C13CPD DMSO E:\data CUG

151.31  
 148.01  
 139.42  
 137.15  
 128.07  
 127.62  
 126.09  
 124.19  
 116.26  
 99.09  
 34.41  
 28.86  
 9.87

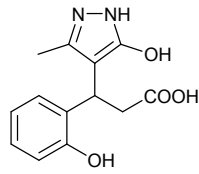

3a

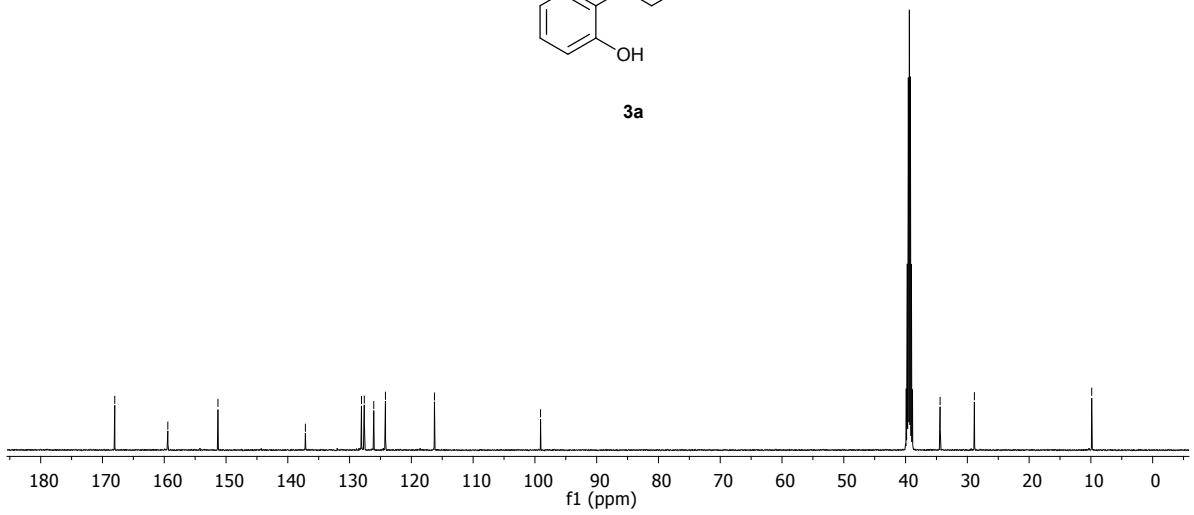

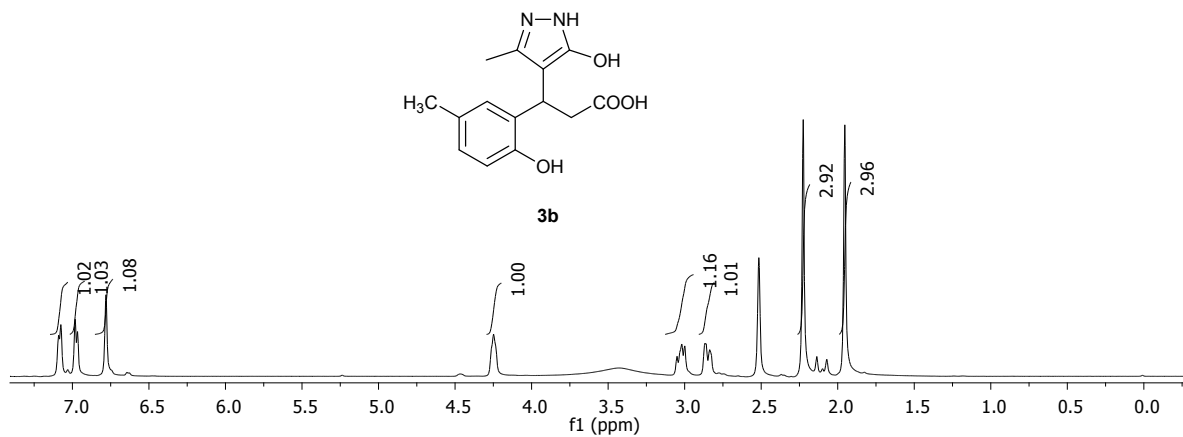

Shanta Raj  
 C13CPD DMSO E:\data CUG

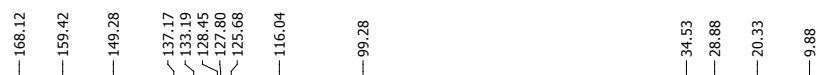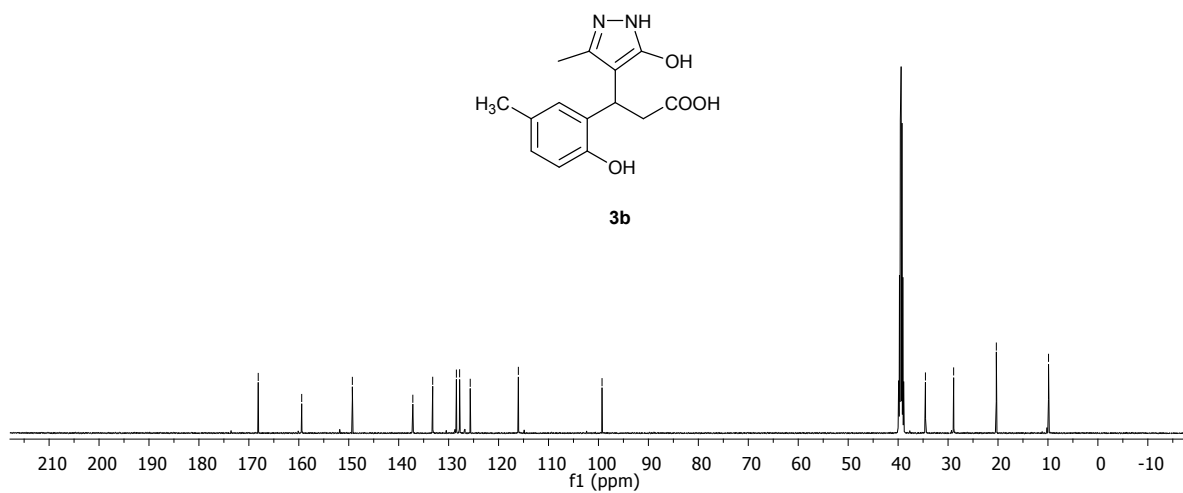



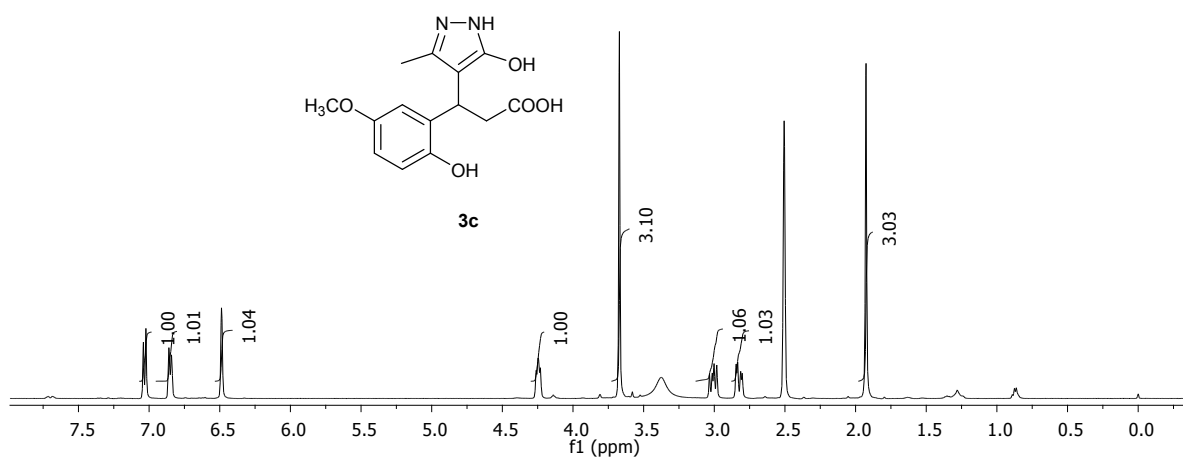

Shanta Raj  
 RC-SRL-188  
 C13CPD CDCl3 E:\data CUG

168.32  
 159.51  
 155.75  
 145.38  
 137.25  
 127.36  
 117.18  
 112.94  
 112.87  
 99.06  
 55.49  
 34.52  
 29.28  
 9.97

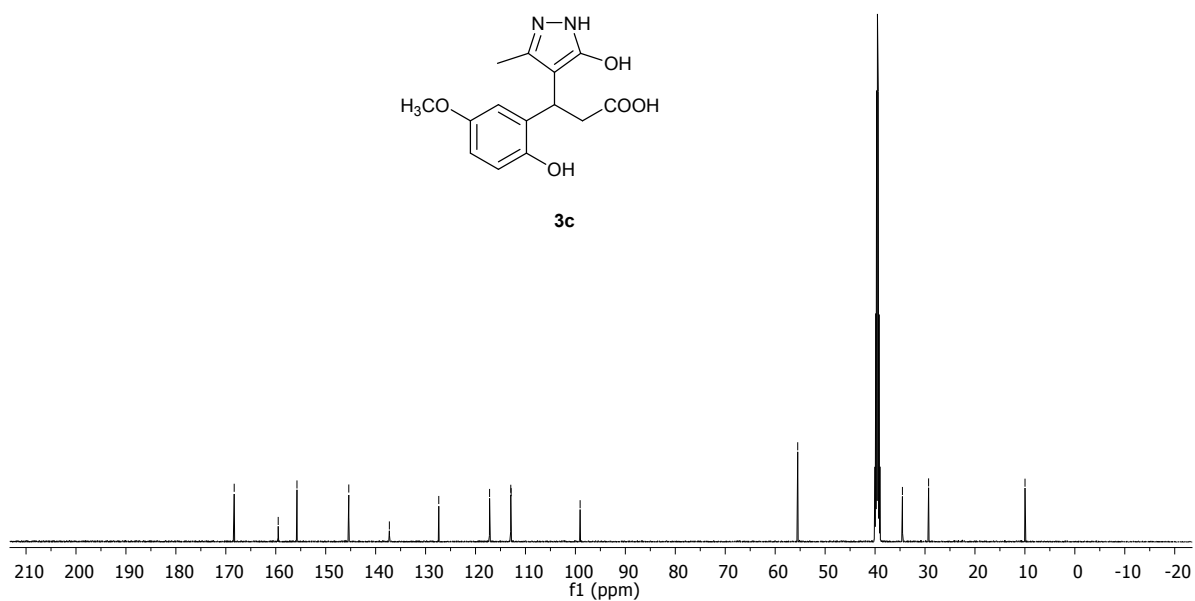

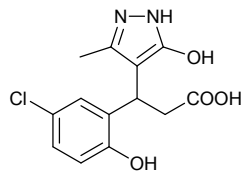

3d

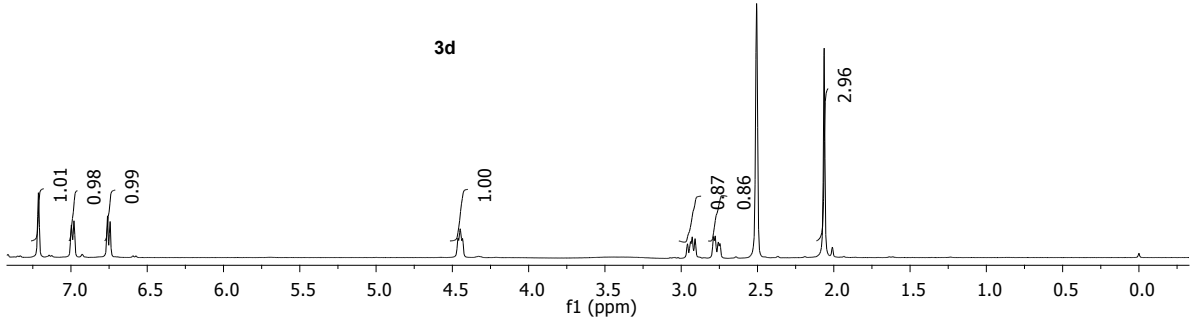

Shanta Raj  
C13CPD CDCI3 E:\data

128.78  
— TMS

160.02  
—

153.31  
—

137.46  
/

133.24  
/

127.96  
/

126.29  
/

122.17  
/

116.67  
/

101.82  
—

37.96  
—

29.41  
—

10.24  
—

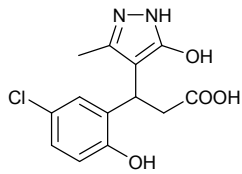

3d

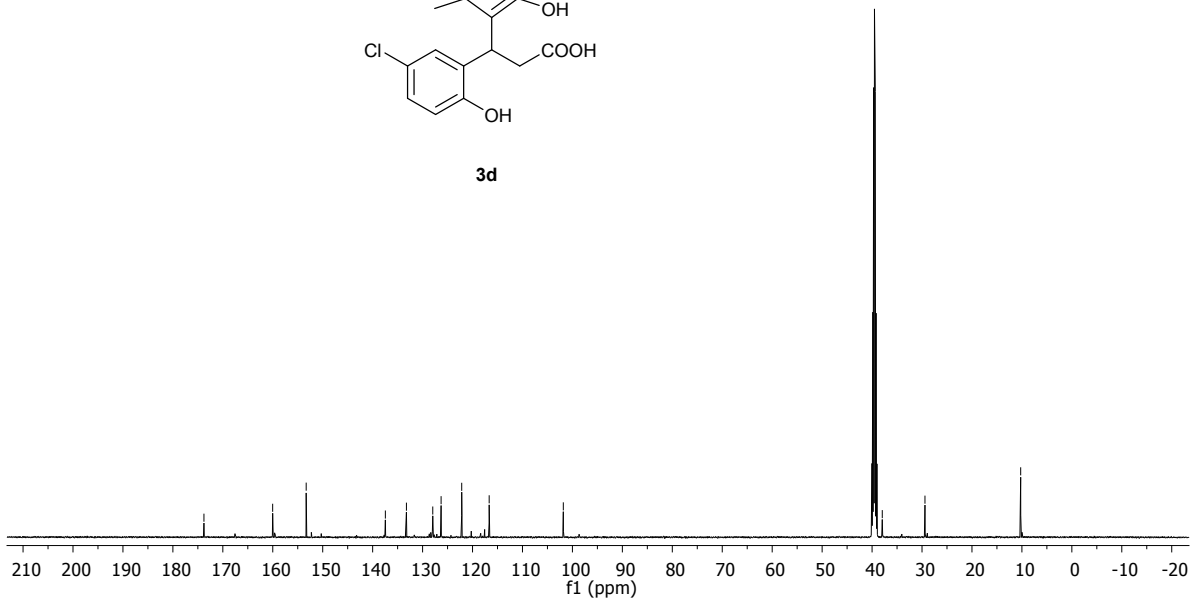

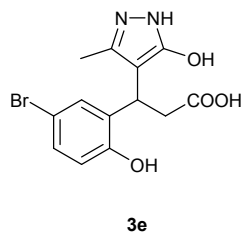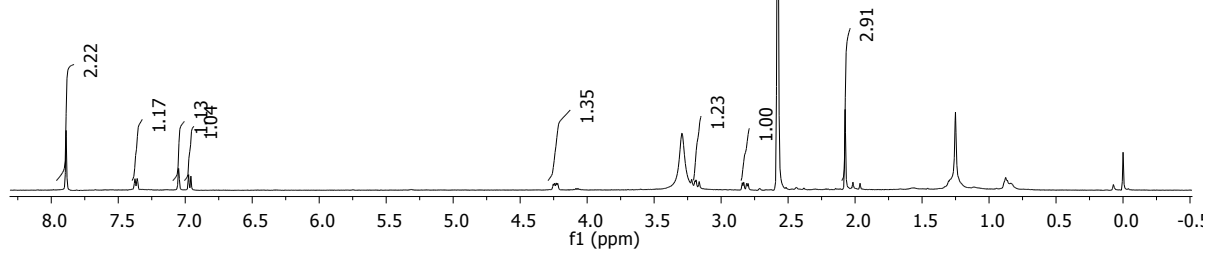

Shanta  
RC-SR  
C13CPD

159.38  
150.24  
137.45  
131.04  
128.61  
127.96  
127.09  
118.31  
98.62  
34.00  
28.87  
9.90

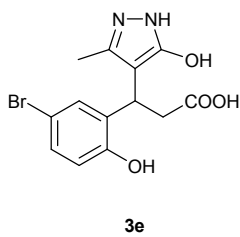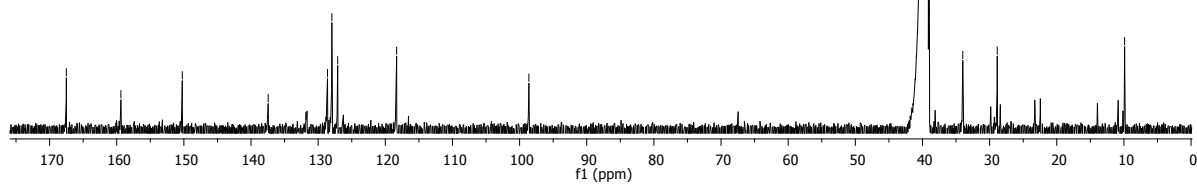

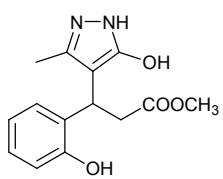

3f

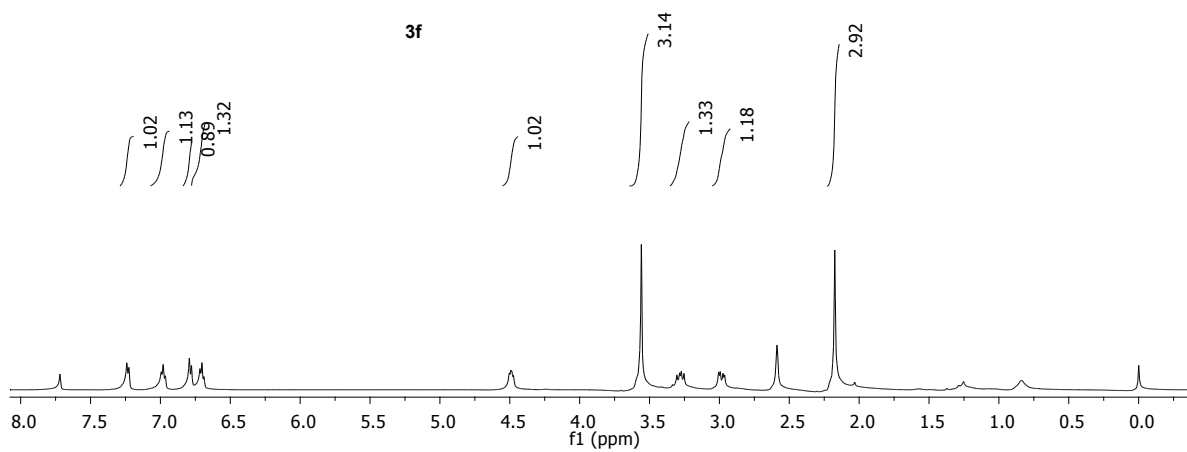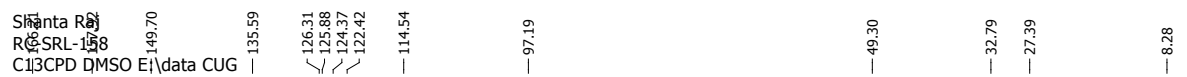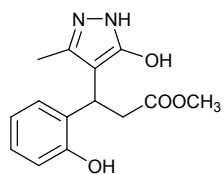

3f

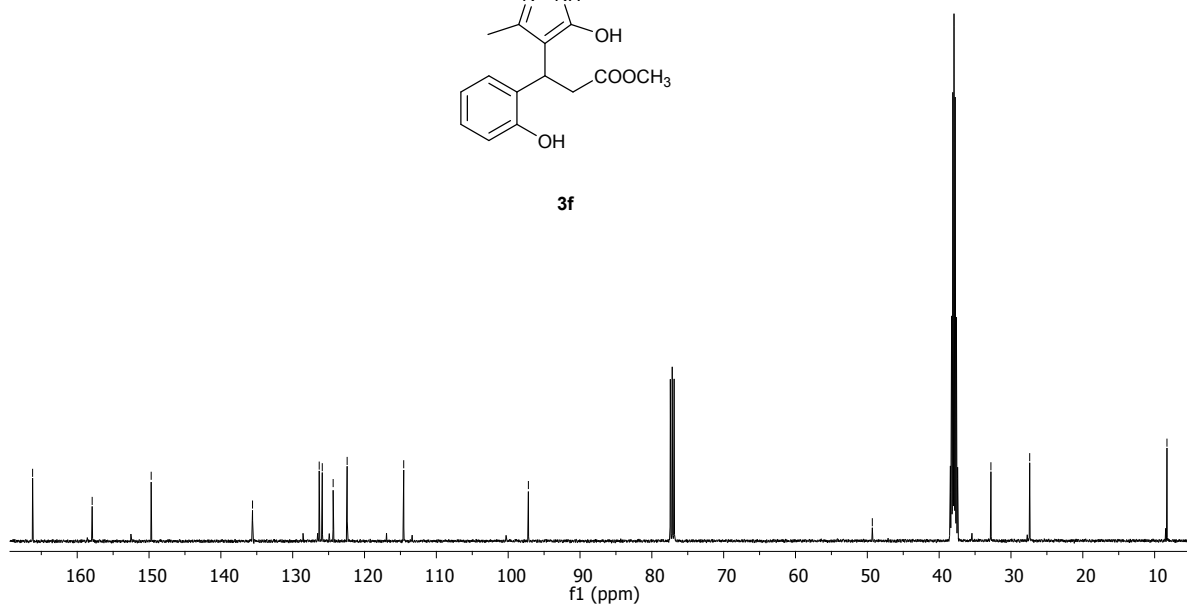

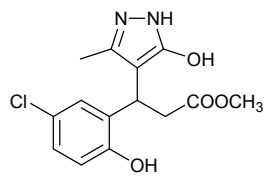

3g

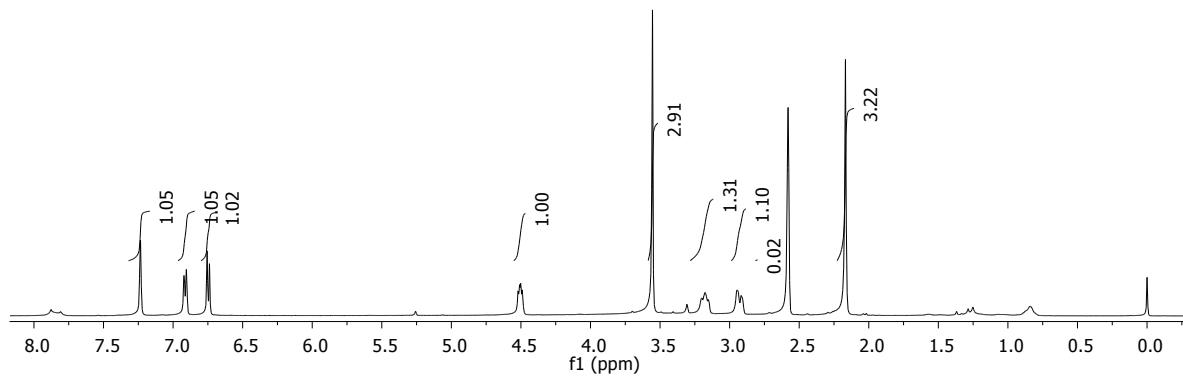

Shanta Raj  
 RC-SRL-161  
 C13CPD DMSO E:\data CUG

172.44

160.69

152.66

137.73

131.85

127.45

126.16

123.07

115.48

101.60

51.17

36.86

28.86

9.93

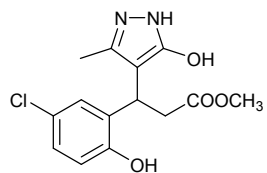

3g

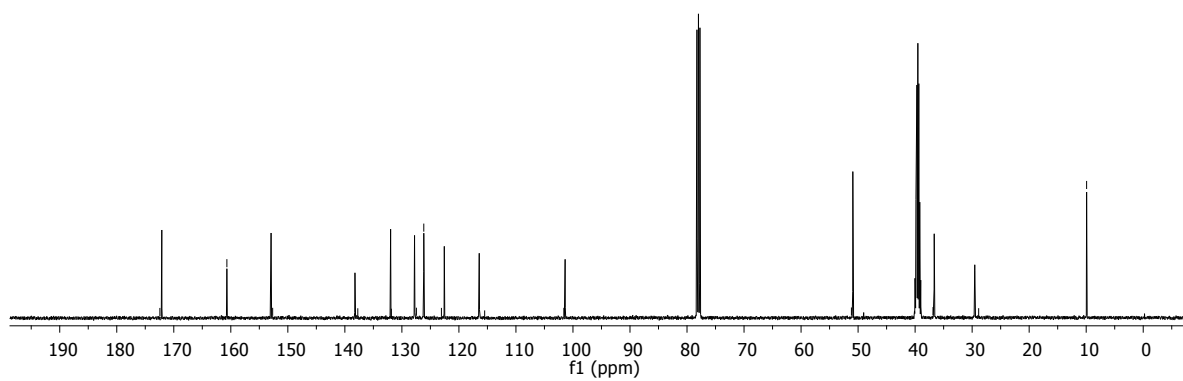

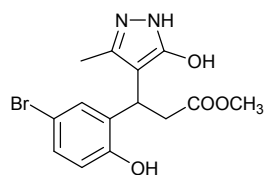

**3h**

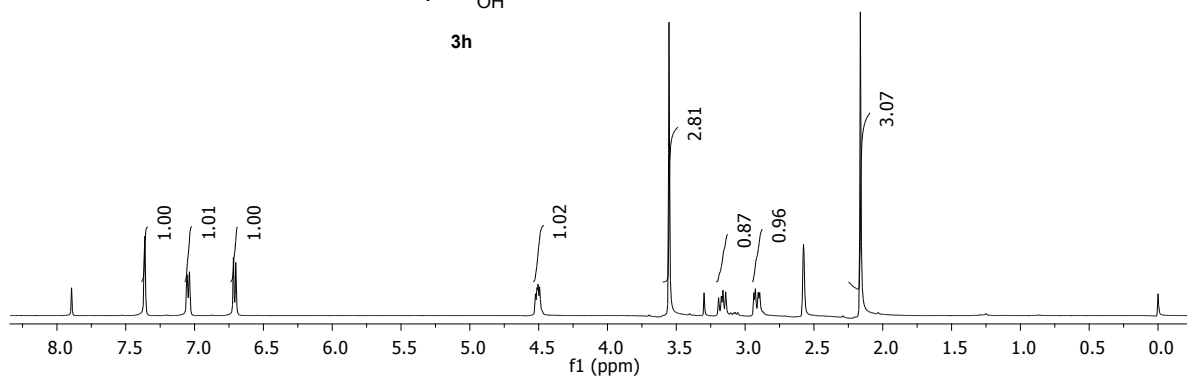

Shanta Raj  
C13CPD DMSO E:\data CUG

170.72

159.02

152.18

136.63

131.44

129.36

127.82

115.67

108.76

99.99

49.66

35.51

28.07

8.67

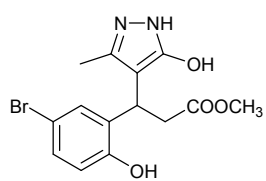

**3h**

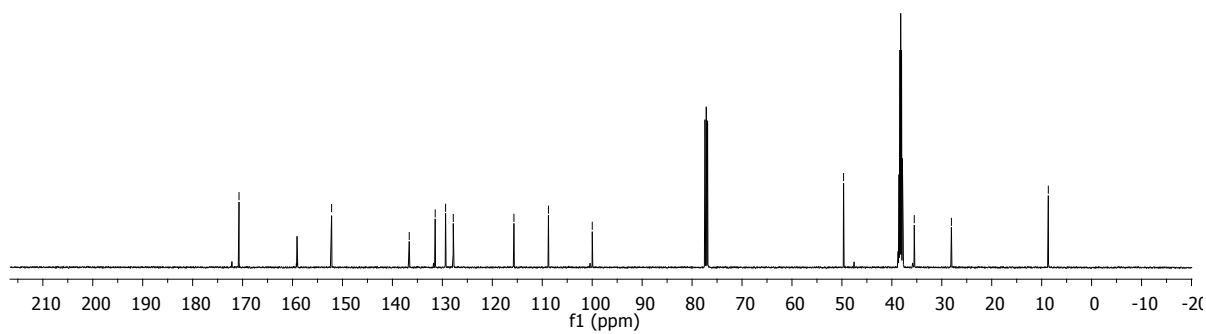

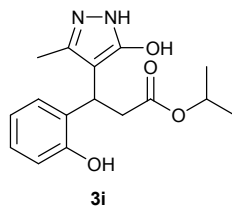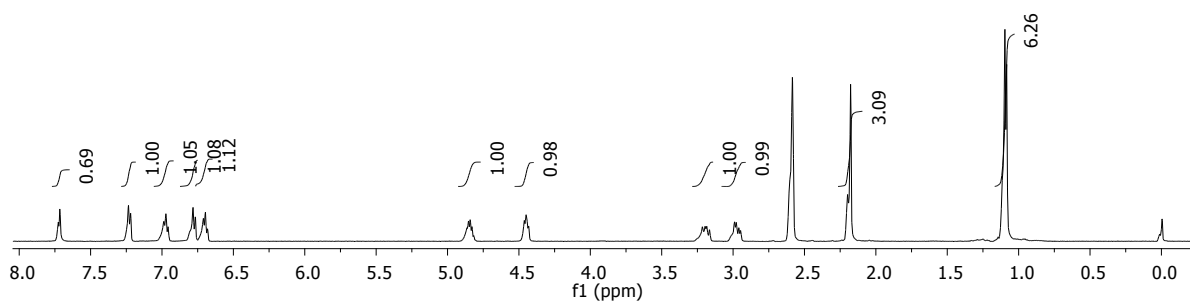

Shanta Raj  
C13CPD CDCI3 E:\data C13

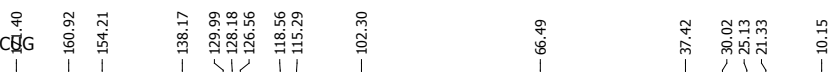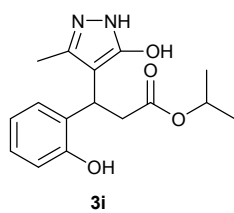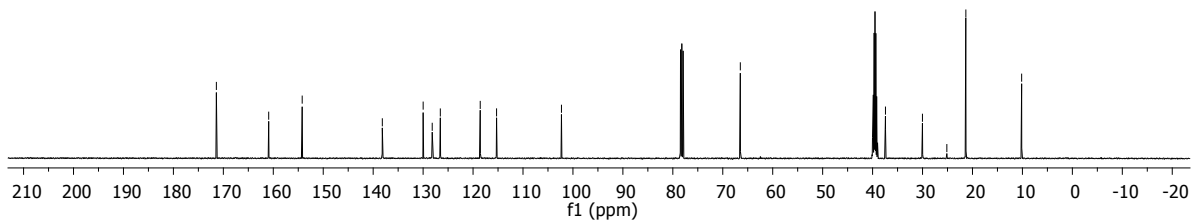

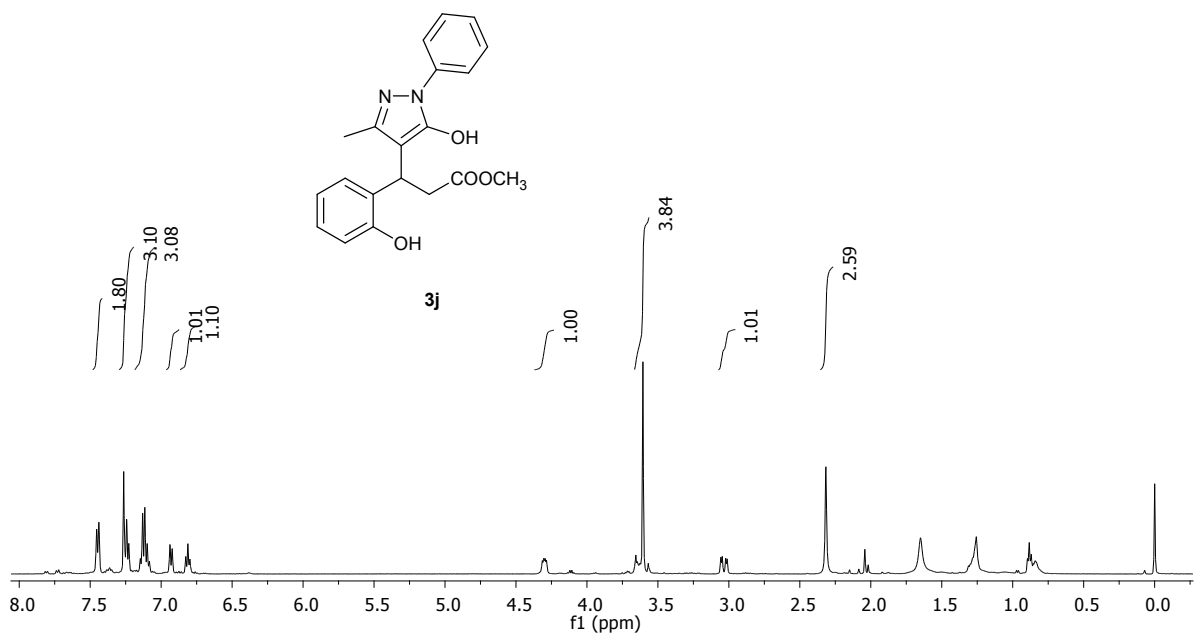

Shan...  
 C13...  
 135.68  
 129.05  
 128.97  
 127.36  
 126.16  
 124.59  
 120.45  
 117.09  
 60.59  
 29.85  
 21.17  
 14.23

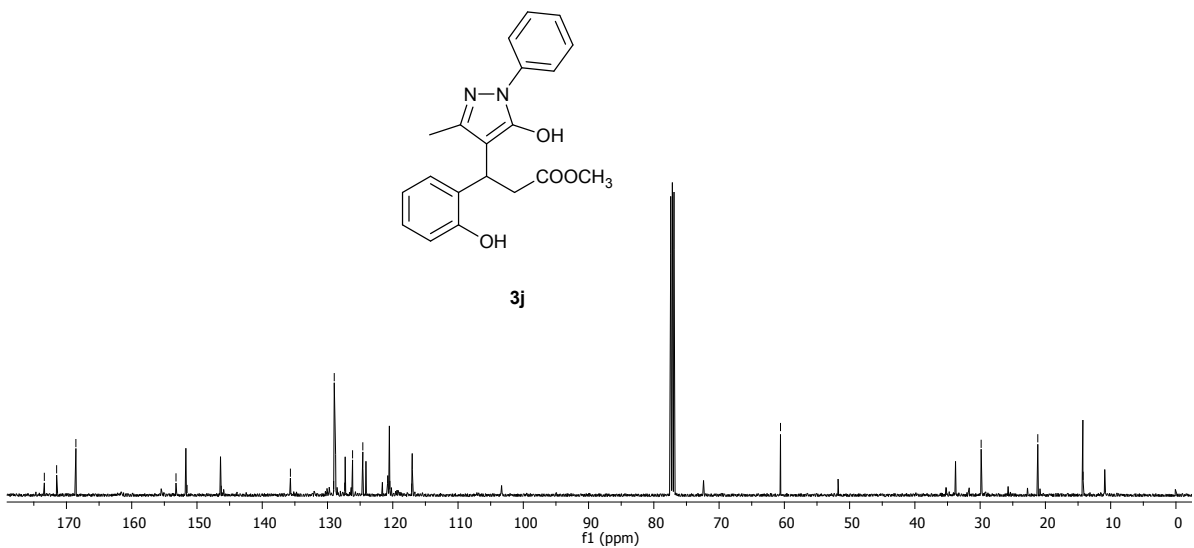



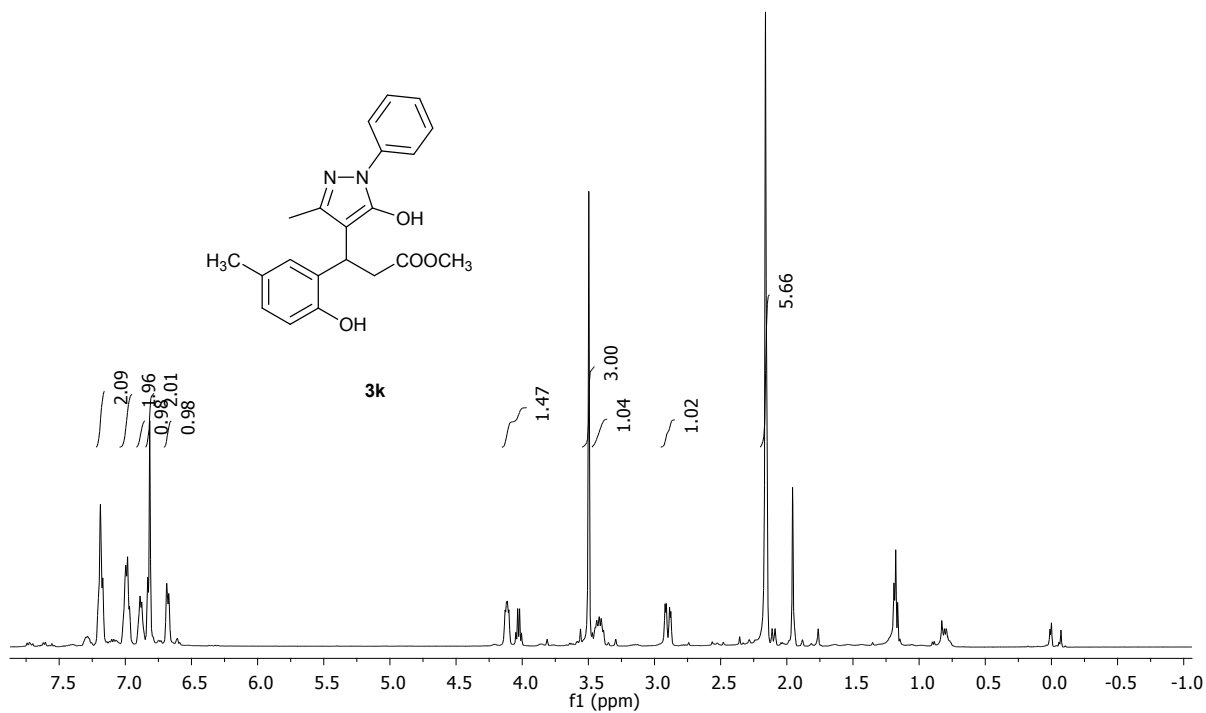

Santa Raj  
 CPD CDC13 Edata CUG  
 132.92  
 126.21  
 135.11  
 130.69  
 129.48  
 129.03  
 128.92  
 126.44  
 120.74  
 119.59  
 107.83  
 60.71  
 51.58  
 35.03  
 25.67  
 20.58  
 14.25  
 11.02

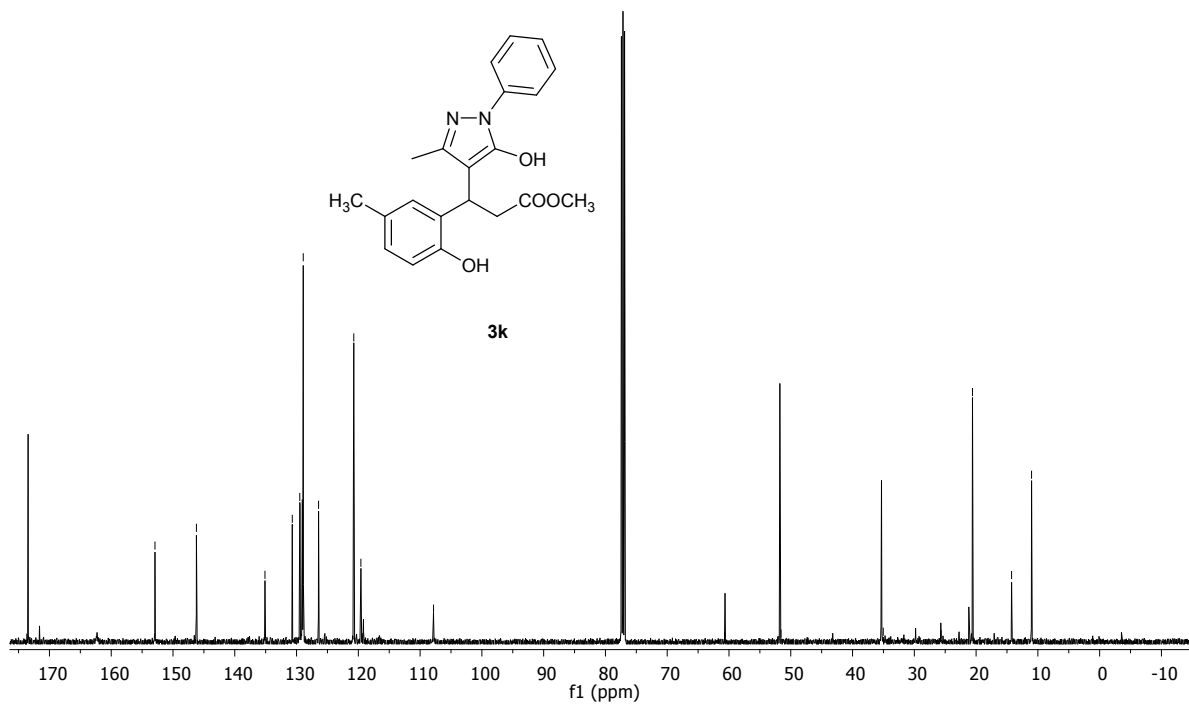

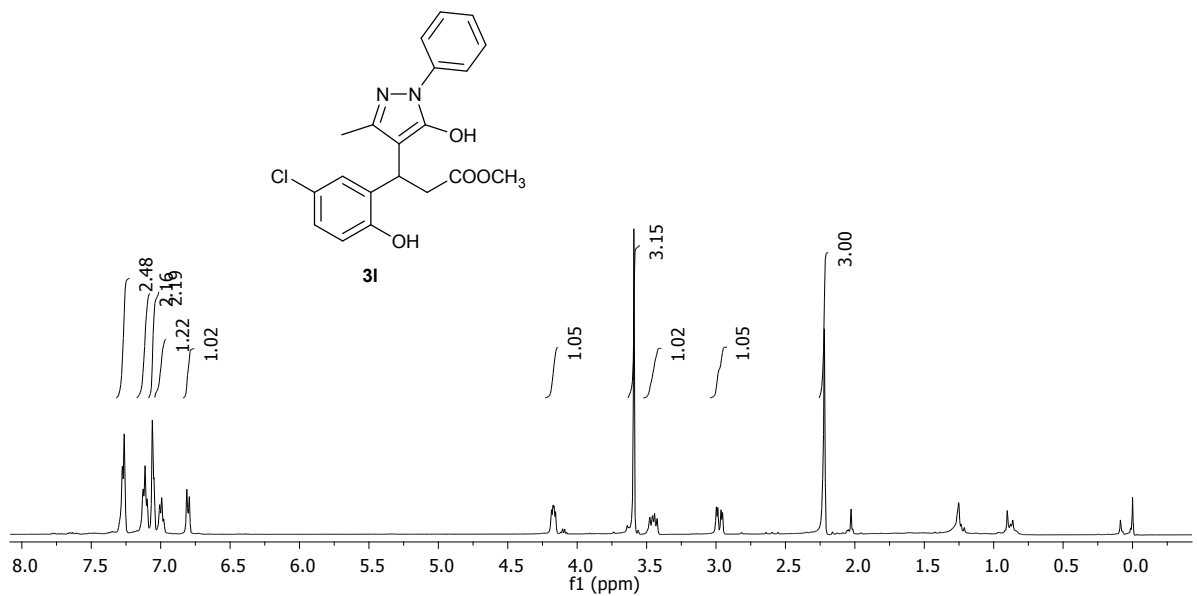

Shanta Raj  
 RC SRL-161+PH  
 C13CPD CDC13 E:\data CUG

154.21  
 146.51  
 135.10  
 134.92  
 131.07  
 129.62  
 129.02  
 128.28  
 126.67  
 124.44  
 121.08  
 120.69

51.86  
 34.94  
 31.66  
 11.05

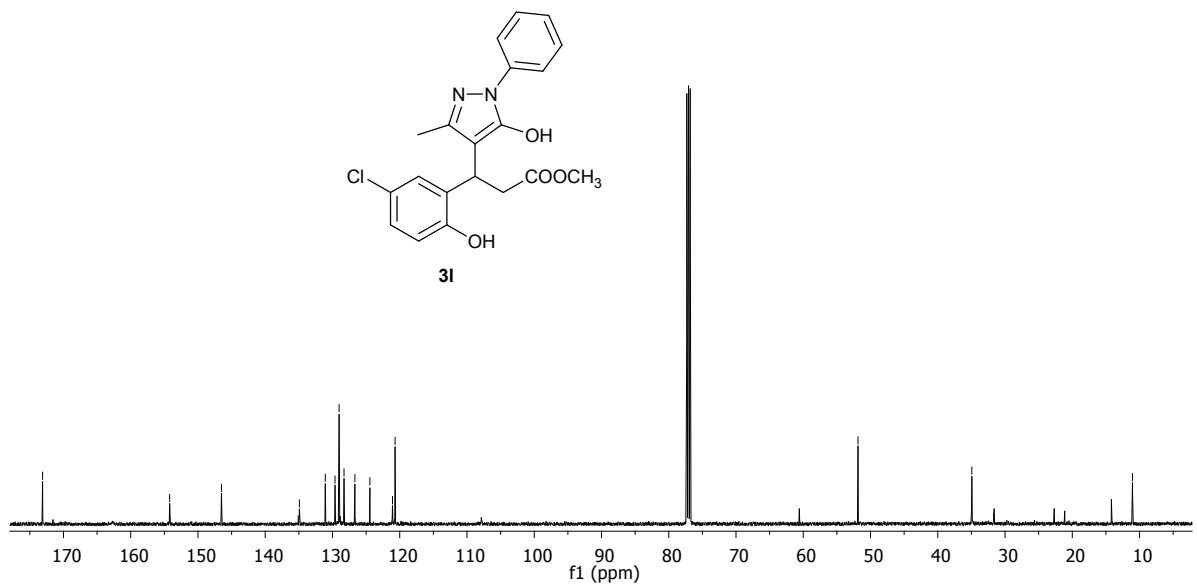

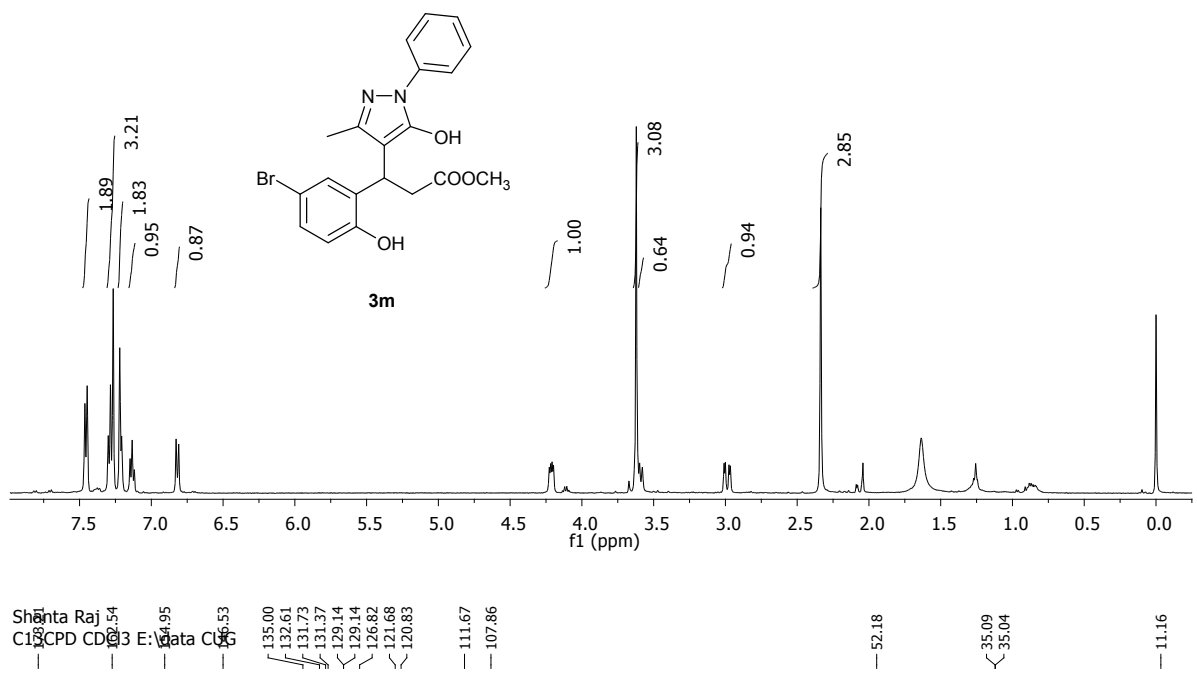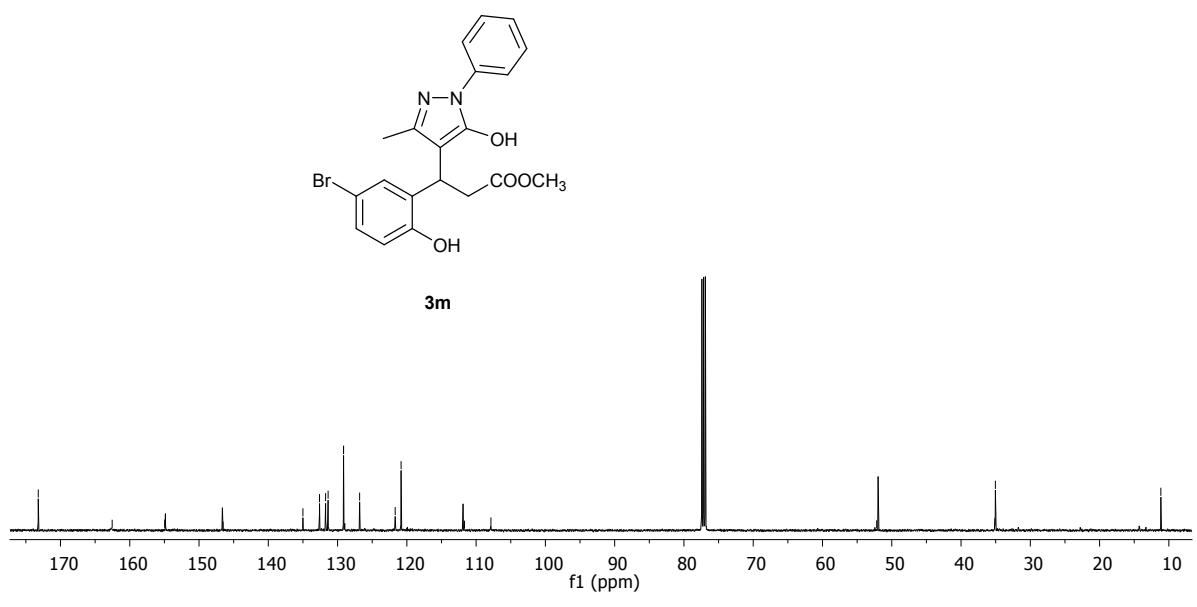

Shanta Raj  
PROTON DMSO E:\data CUG

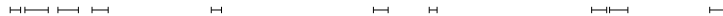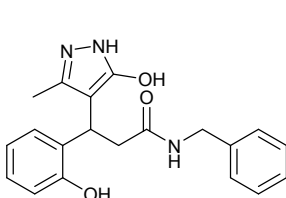

5a

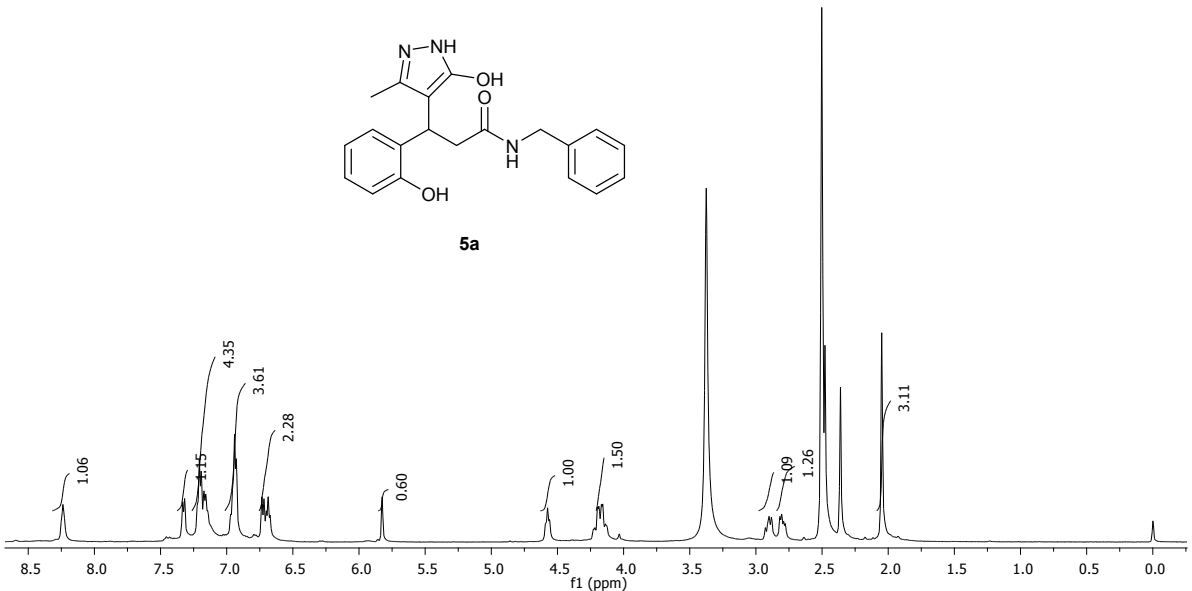

Shanta Raj  
RC-SH-227  
C13CPD DMSO E:\data CUG

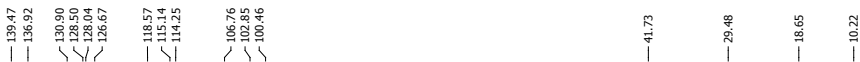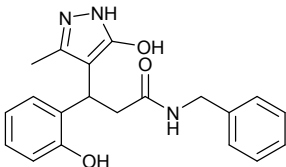

5a

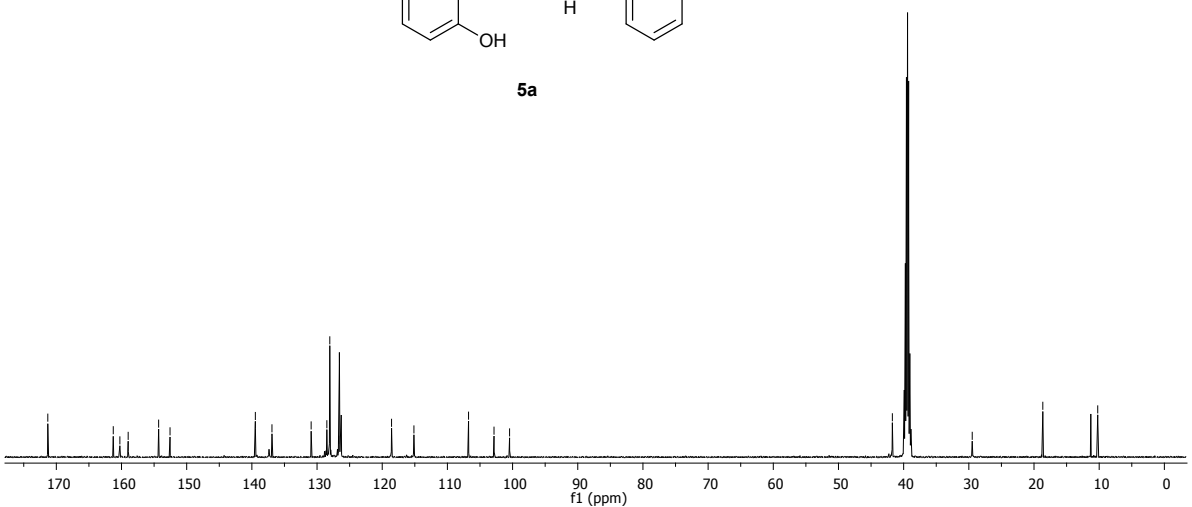

Shanta Raj  
PROTON DMSO E:\data CUG

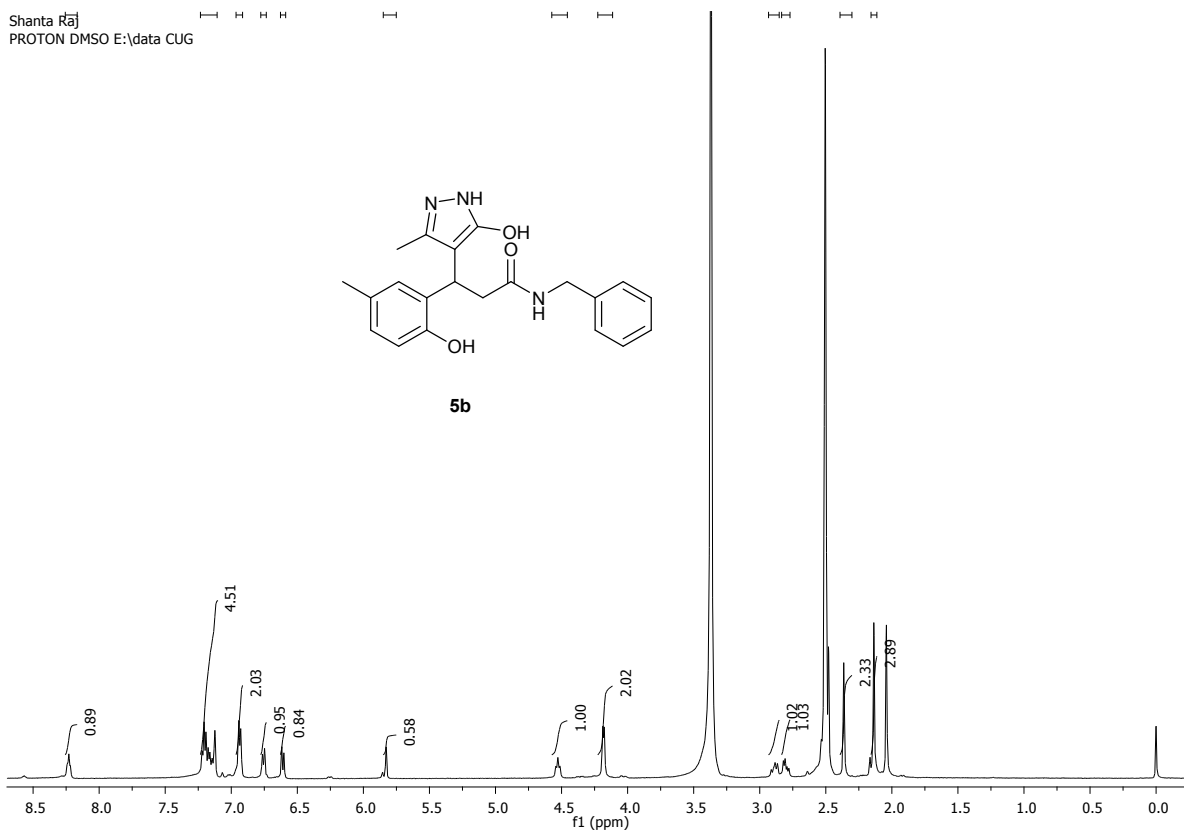

Shanta Raj  
C13CPD DMSO E:\data CUG

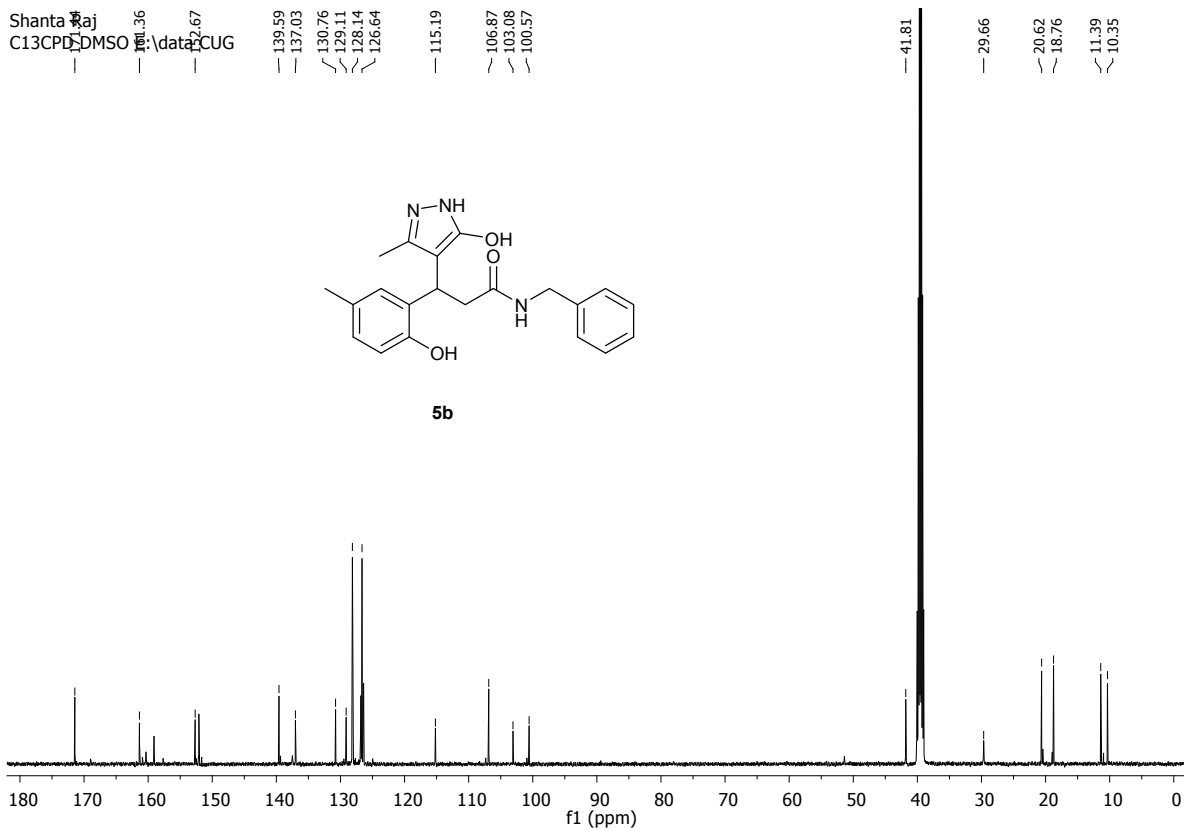

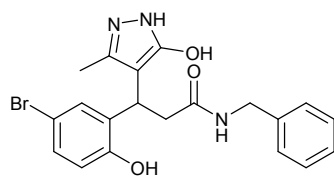

5c

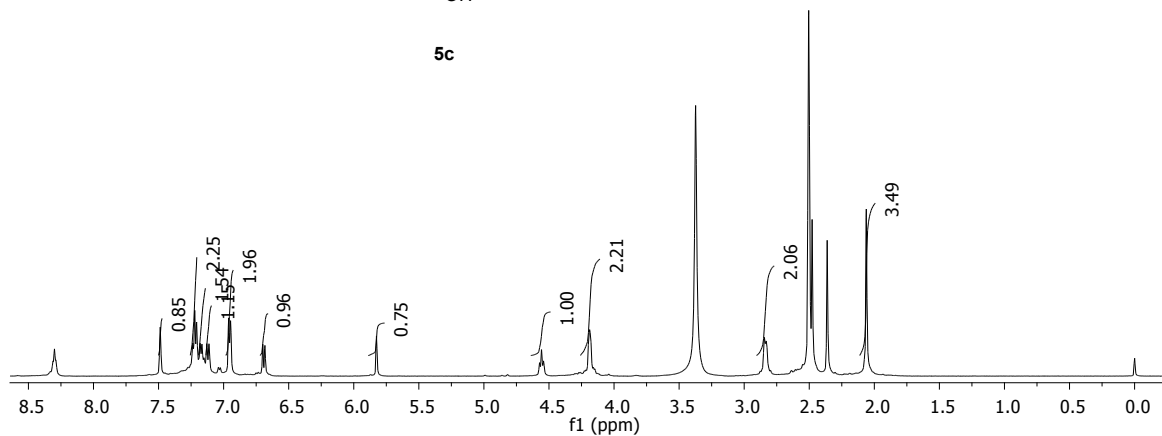

Shanta Raj  
C13CPD DMSO E:\data CUG

171.03  
161.37  
159.08  
152.67  
143.19  
139.55  
137.03  
133.20  
131.62  
128.84  
128.17  
126.61  
106.84  
100.56  
41.80  
29.42  
18.76  
11.40

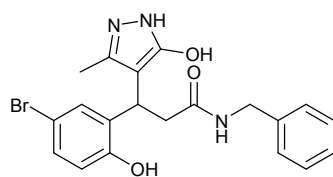

5c

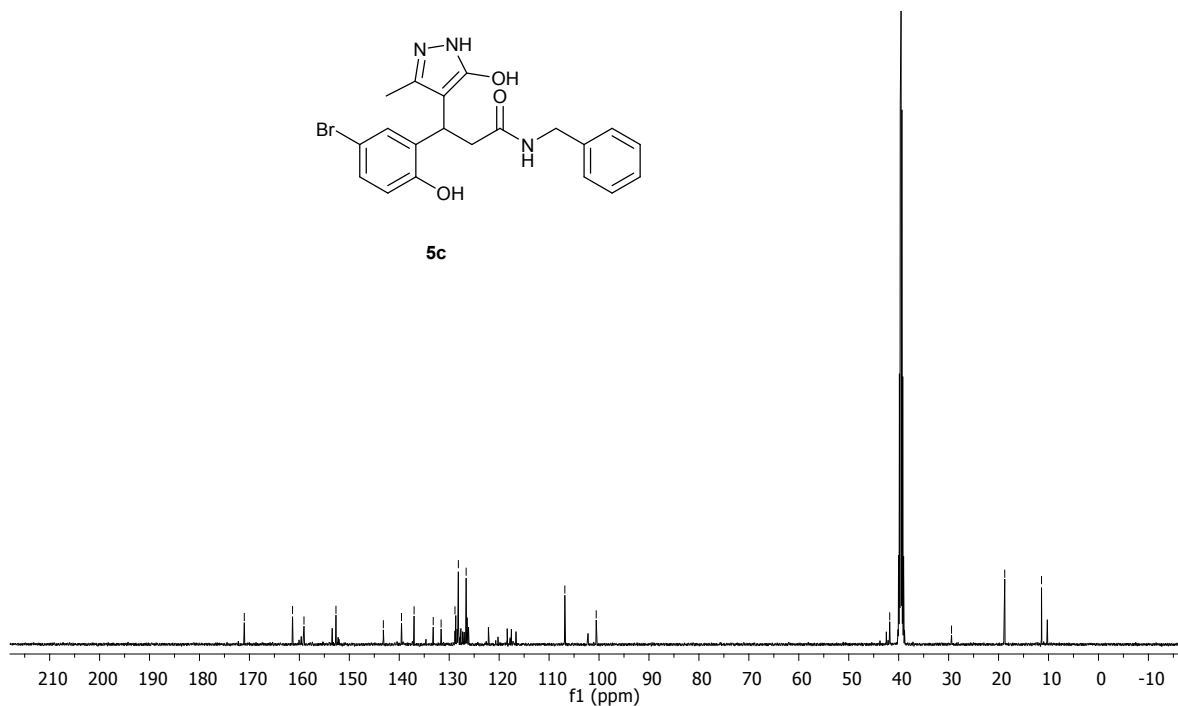

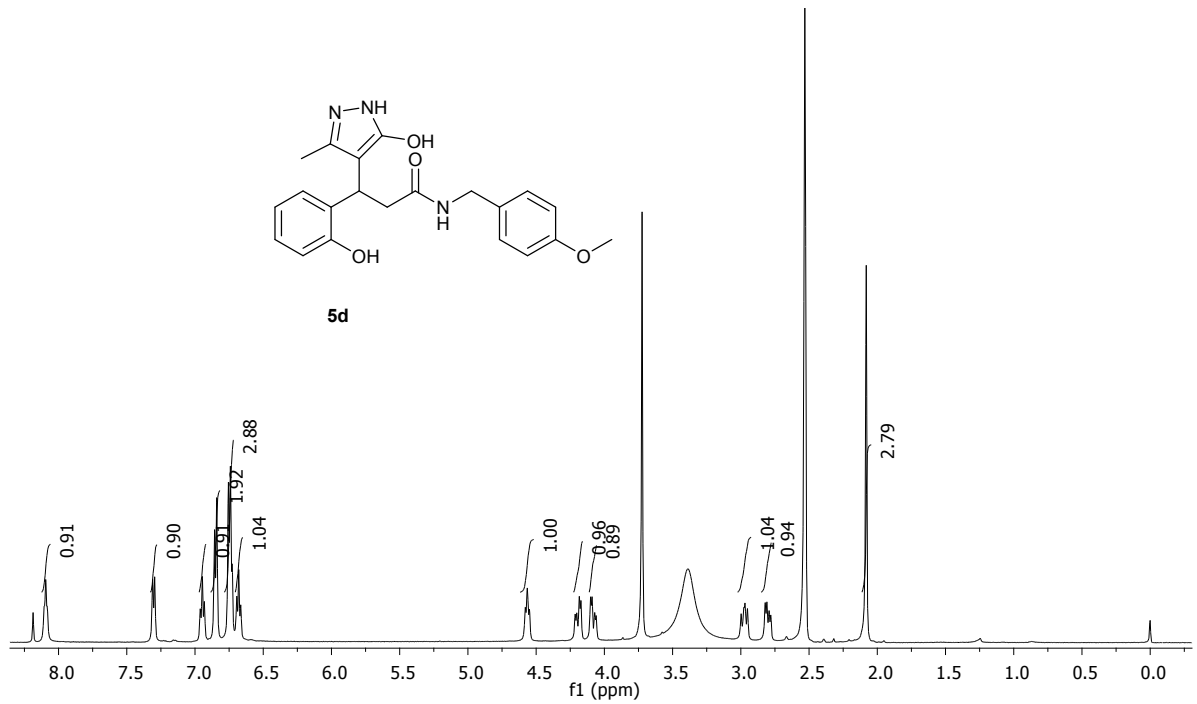

Shanta Raj  
 RC-SRL-158-HH-Benz  
 C13CPD CDCl3 E:\data CUG

171.57  
 160.72  
 157.99  
 154.45

131.31  
 130.91  
 127.91  
 118.72  
 115.43  
 113.47

103.01

79.16  
 78.90  
 78.64

54.95

41.47

30.63  
 29.91

10.33

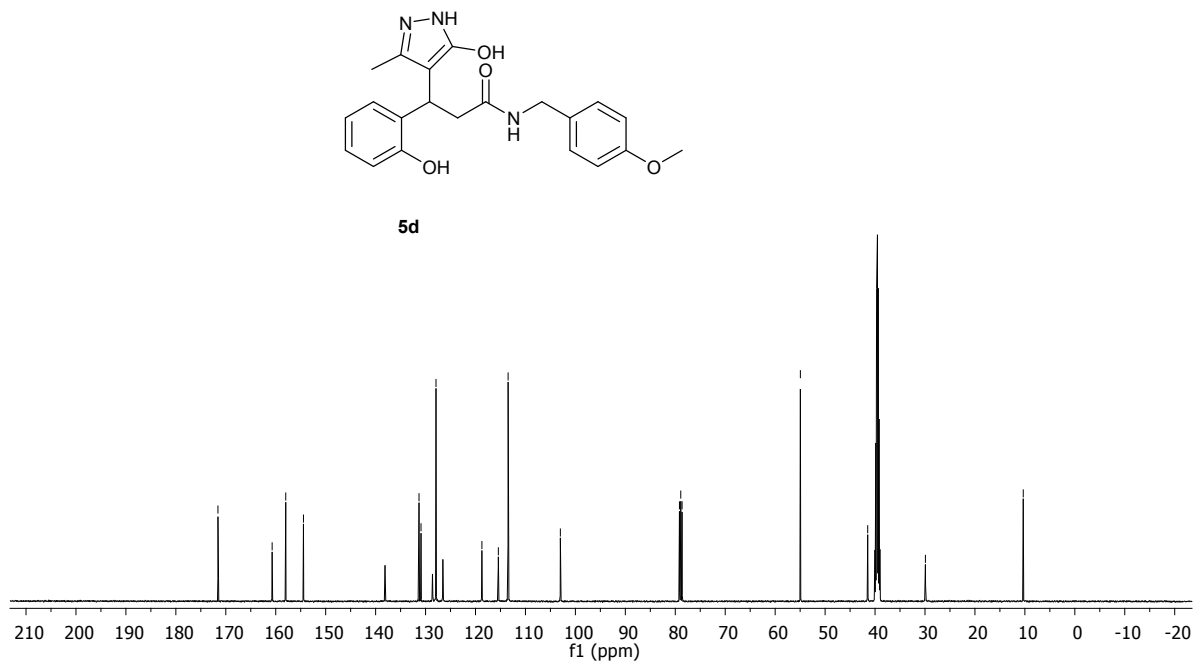

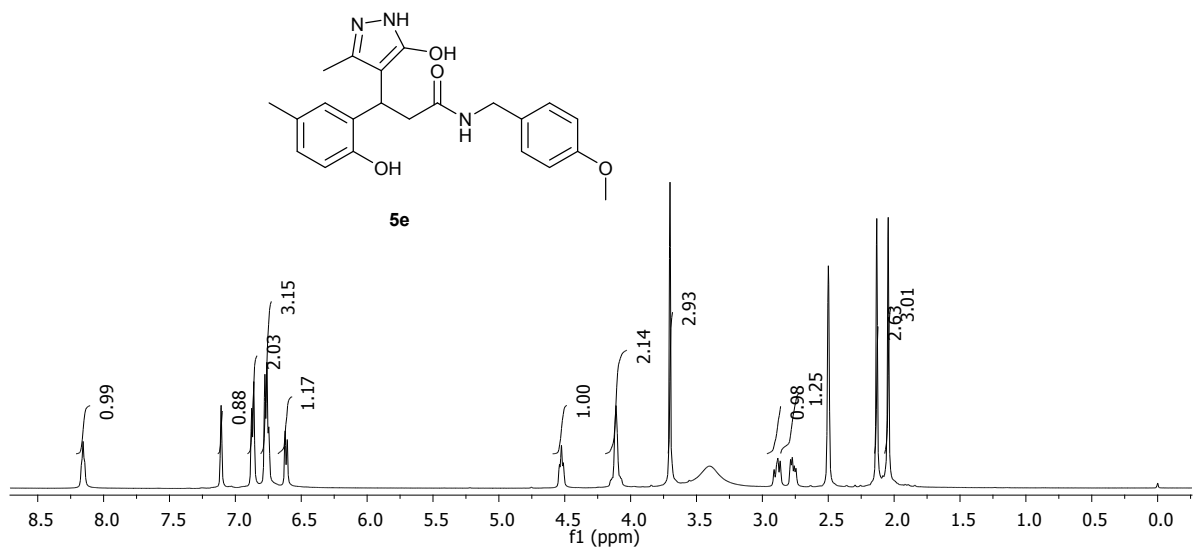

Shanta Raj  
 C13CPD DMSO E:\data CUG

171.29  
 160.32  
 157.94  
 152.08  
 131.52  
 130.80  
 129.10  
 127.92  
 126.82  
 126.78  
 126.23  
 115.17  
 113.53  
 103.03  
 55.06  
 41.25  
 32.26  
 29.65  
 20.61  
 10.36

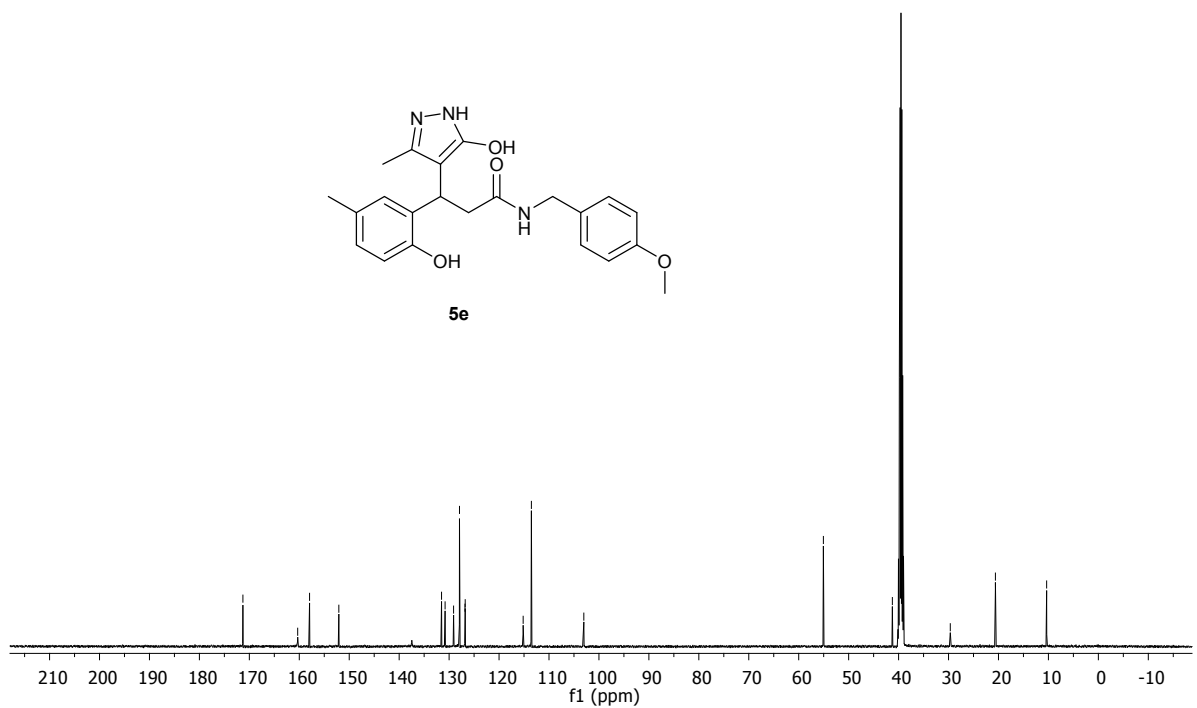



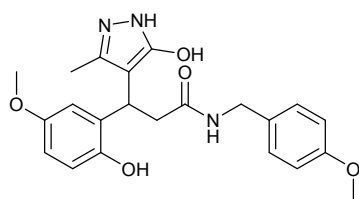

5f

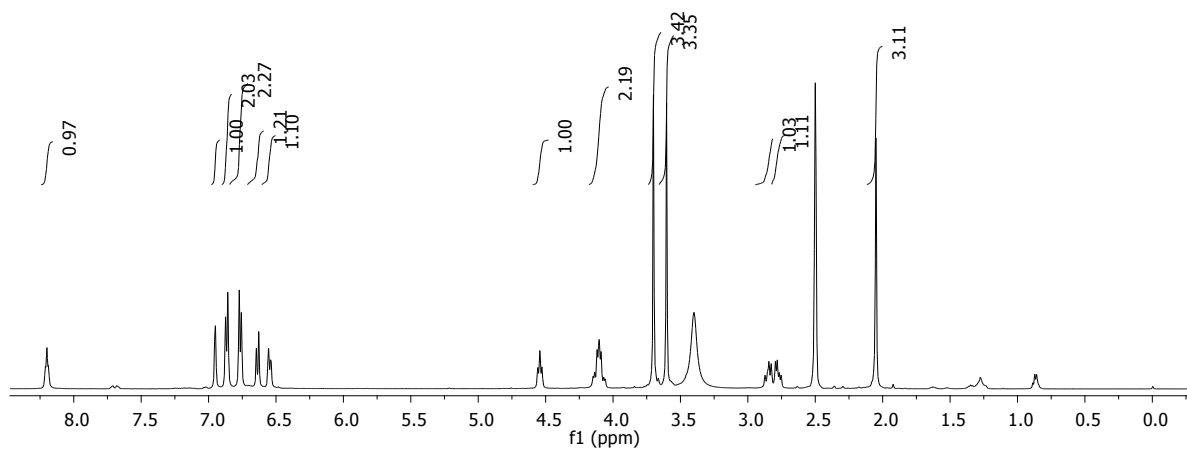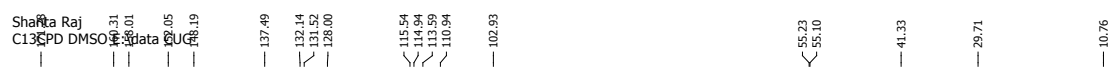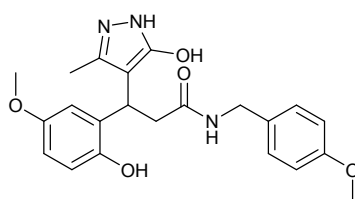

5f

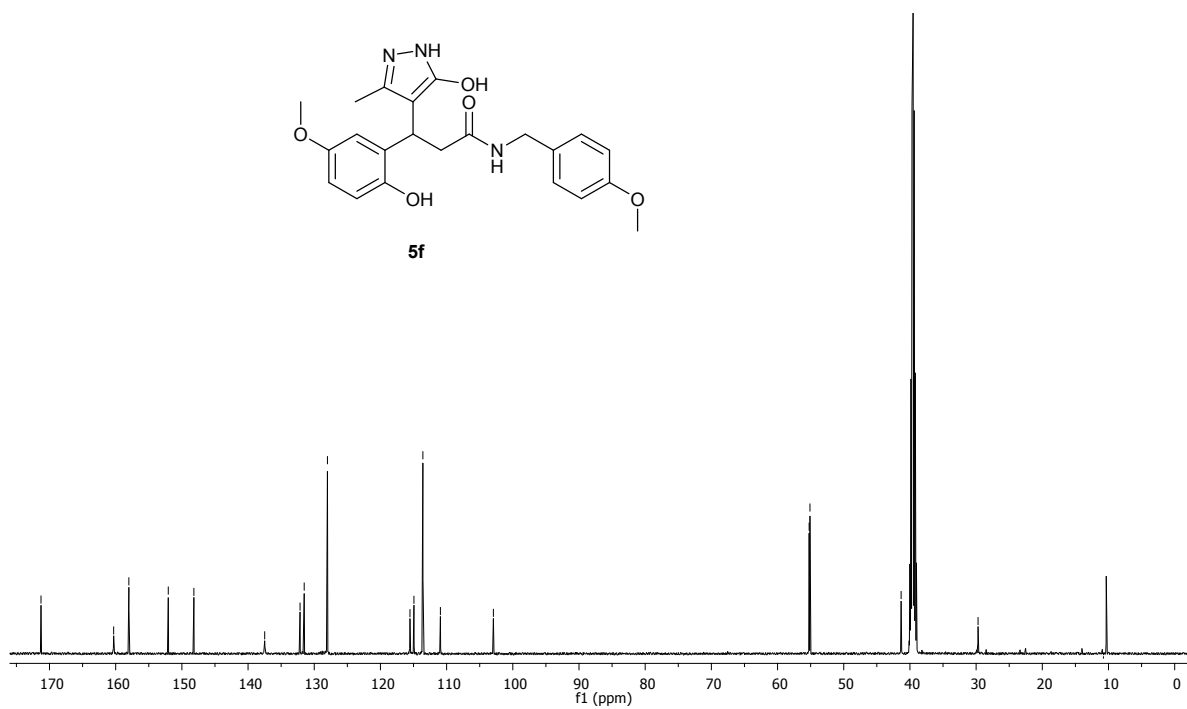

Shanta Raj  
PROTON DMSO E:\data CUG

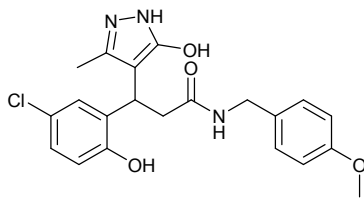

5g

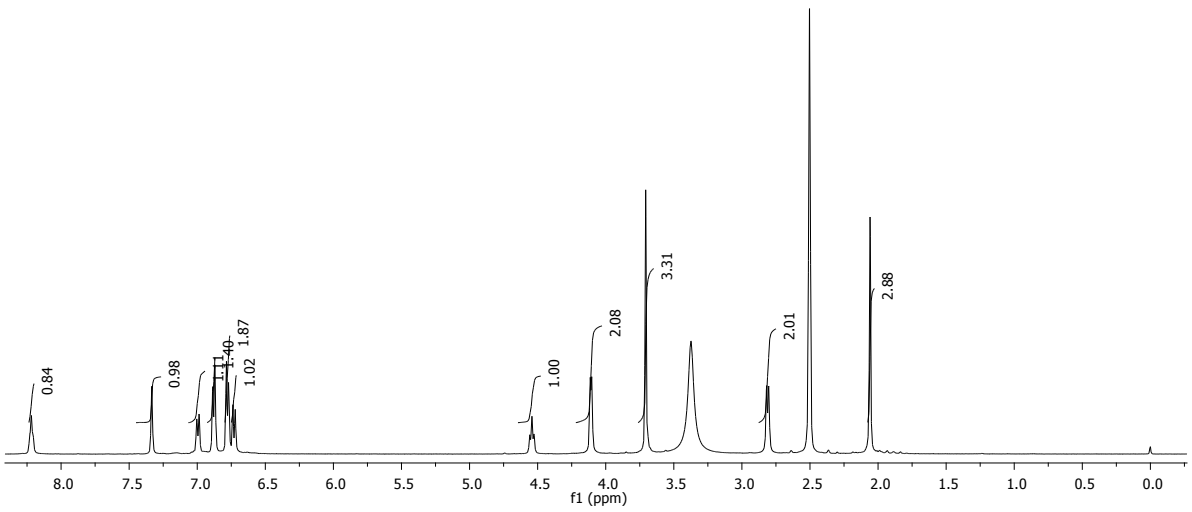

Shanta Raj  
C13CPD DMSO E:\data CUG

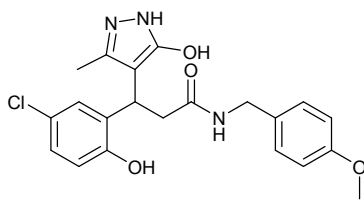

5g

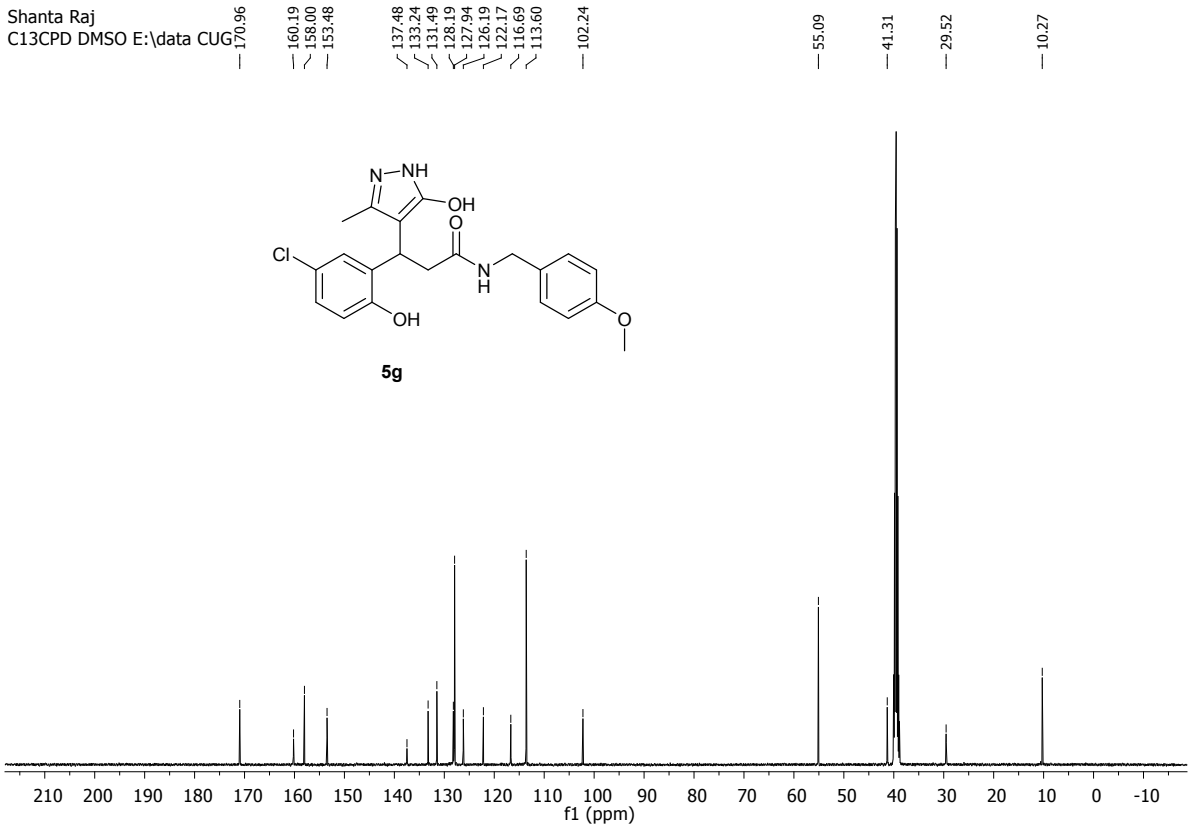

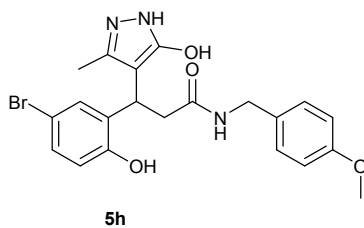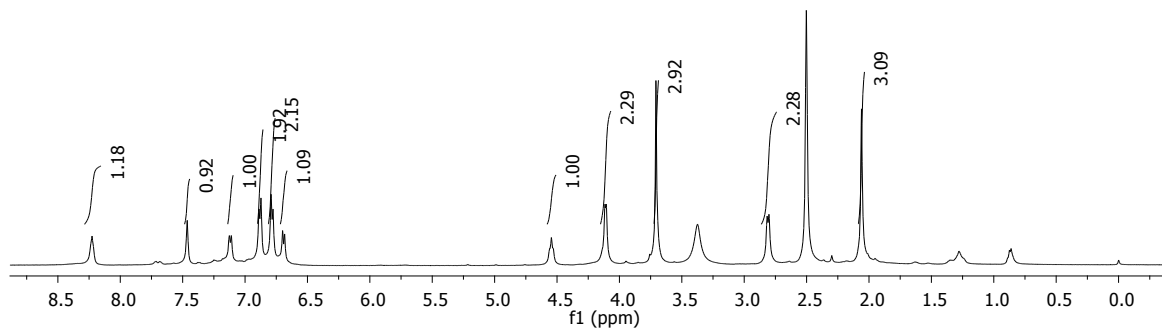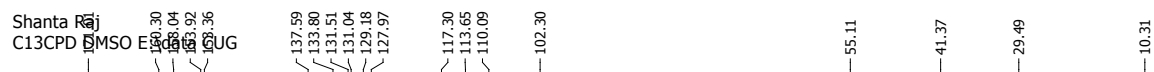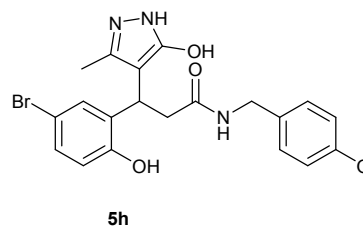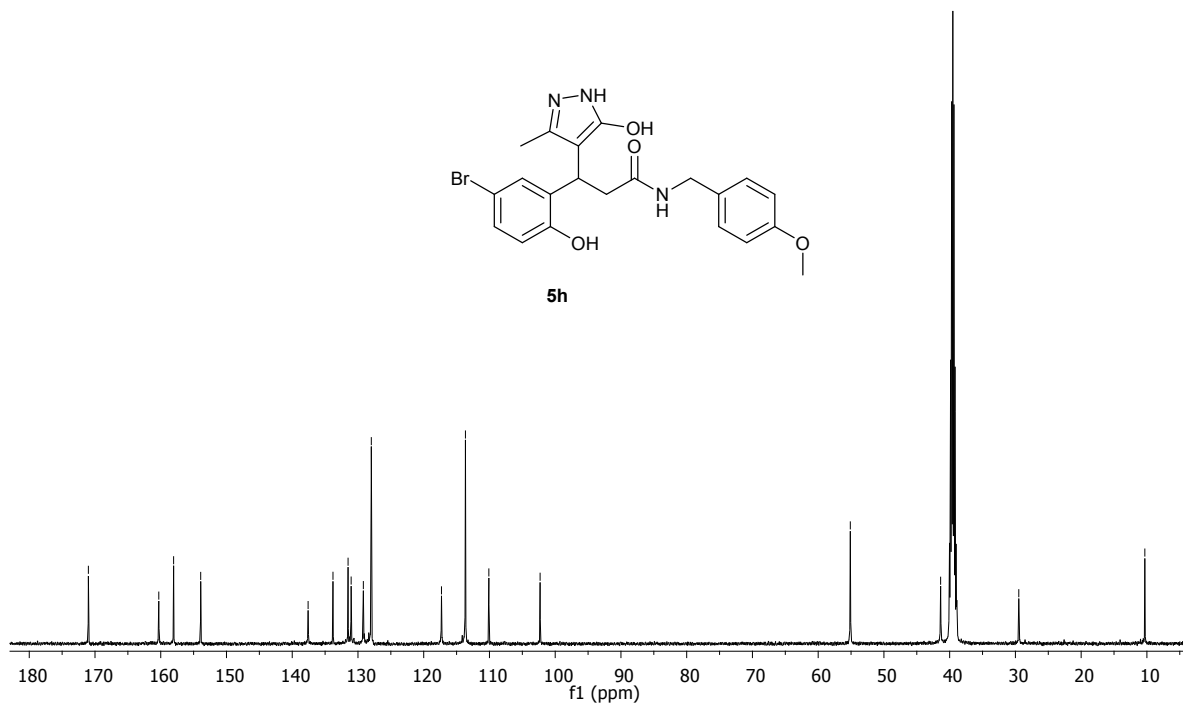

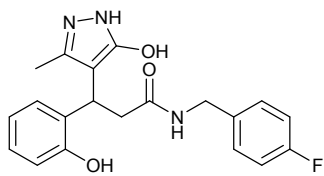

5i

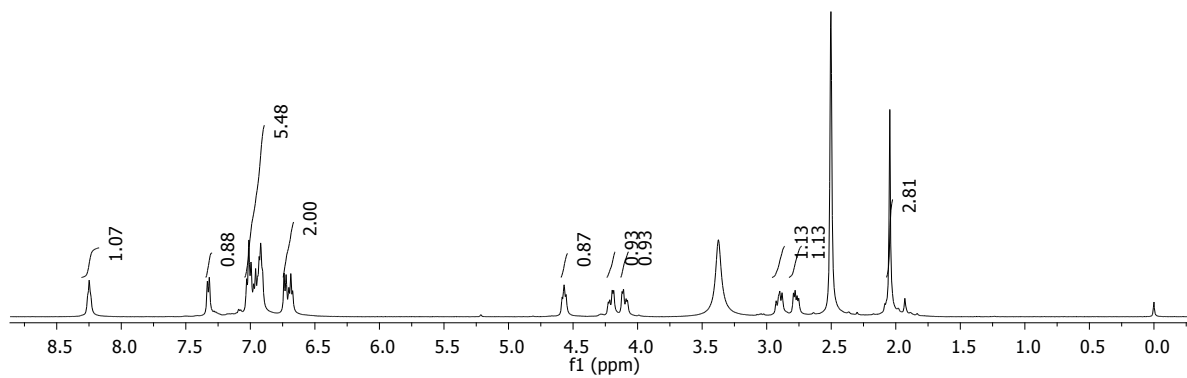

Shanta Raj  
C13CPDMSO  
14.79  
16.24  
18.87  
28.28

135.68  
135.66  
136.39  
128.48  
128.39  
128.32  
126.42  
118.54  
115.04  
114.94  
114.57  
102.66

40.96  
29.45  
10.18

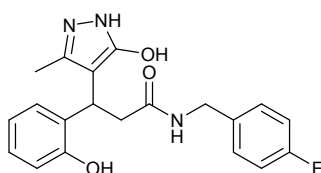

5i

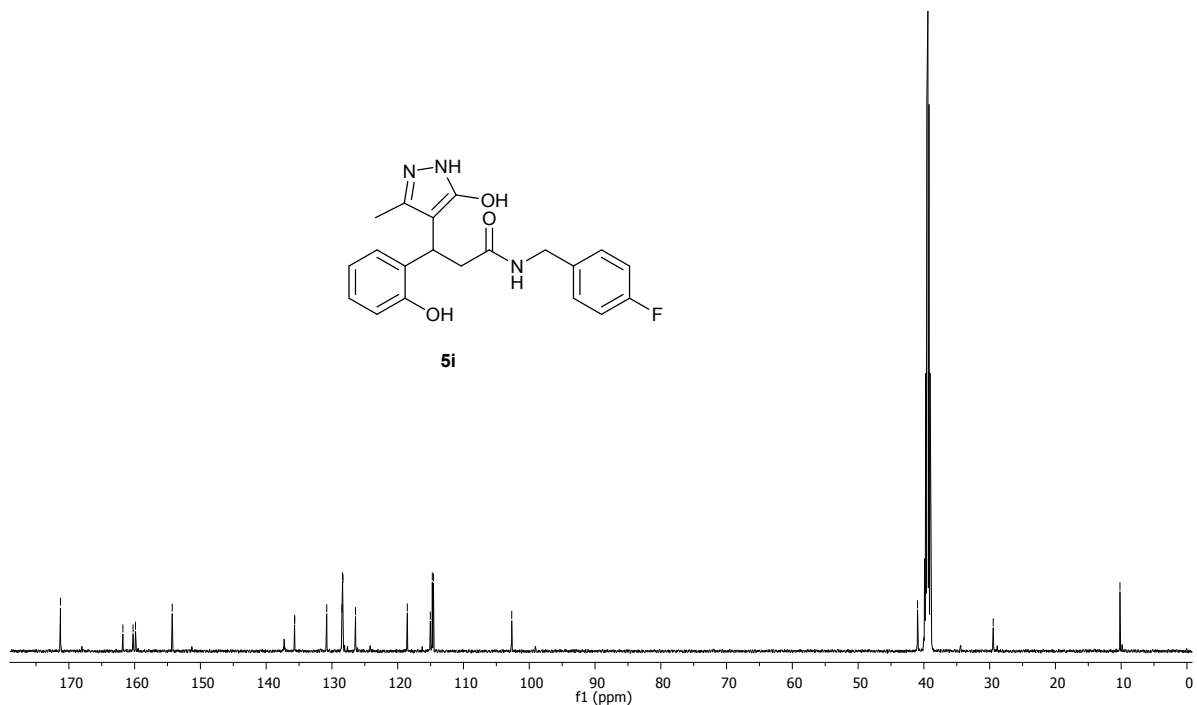

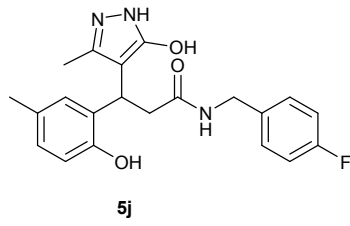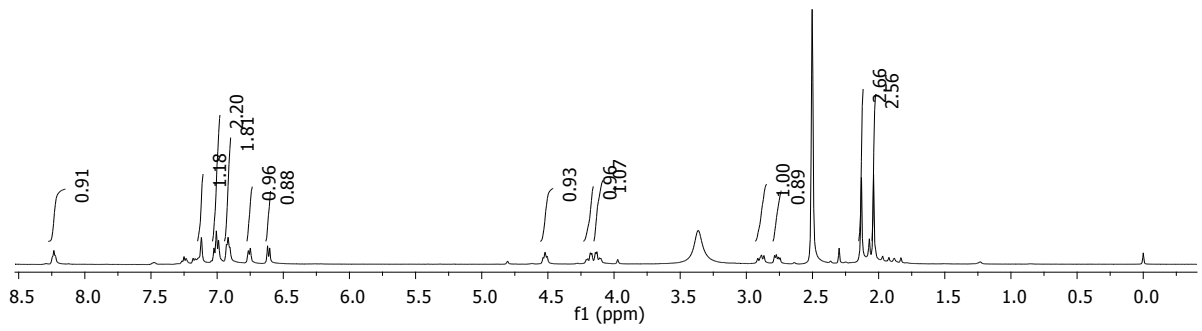

Shant Raj  
 C13CPDMS data CUG

135.81  
 135.78  
 130.70  
 129.00  
 128.31  
 126.88  
 125.41  
 114.84  
 114.68  
 102.96

41.10  
 29.75  
 20.62  
 10.33

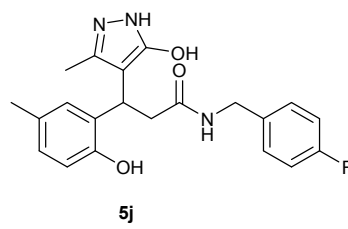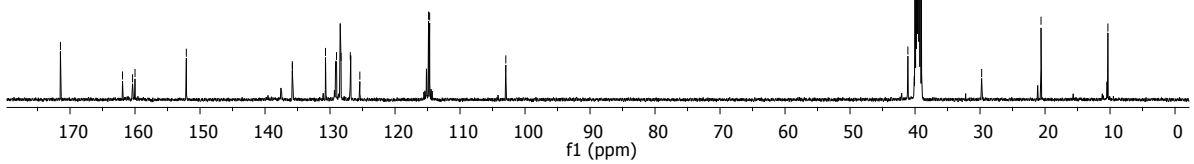

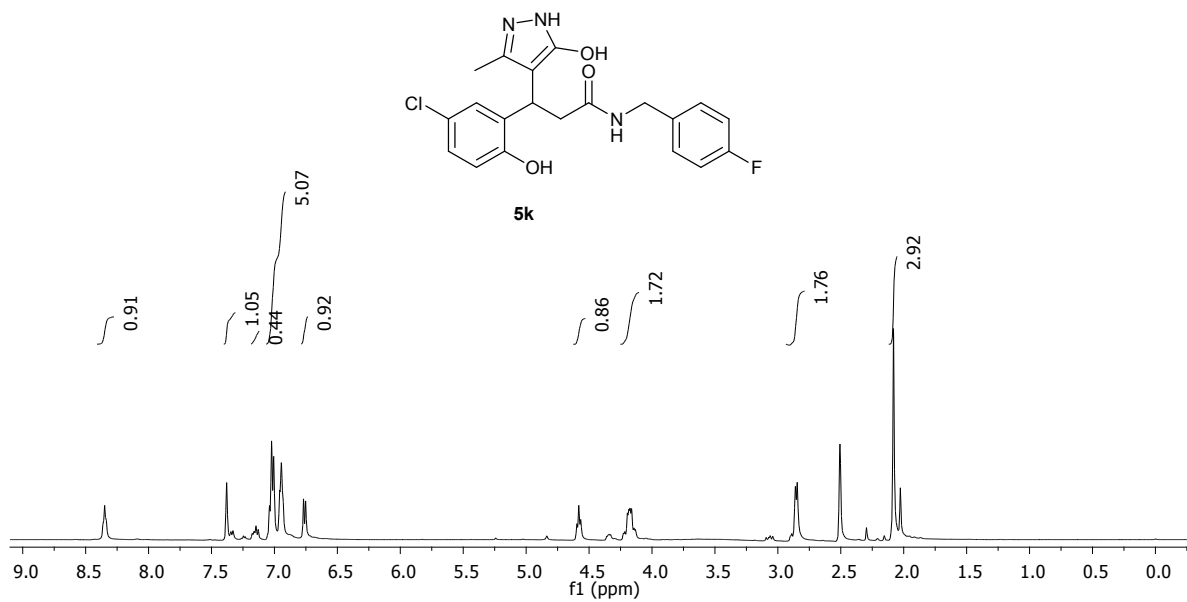

Shanta Raj  
 RC-SRL-208  
 C13CPD DMSO E:\data CUG

171.03  
 167.46  
 161.84  
 160.18  
 153.43  
 150.19  
 137.51  
 135.58  
 132.93  
 128.28  
 126.12  
 122.10  
 118.23  
 116.51  
 114.76

101.90  
 98.60

41.02

29.42

10.09

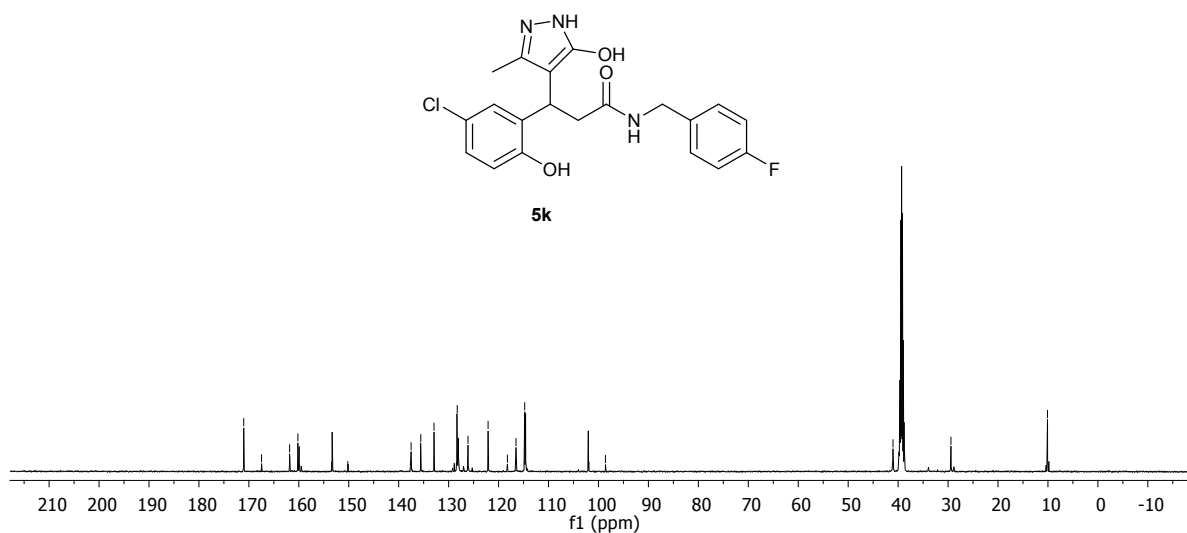

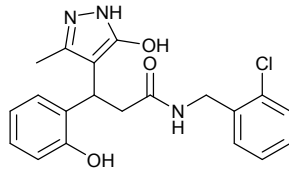

51

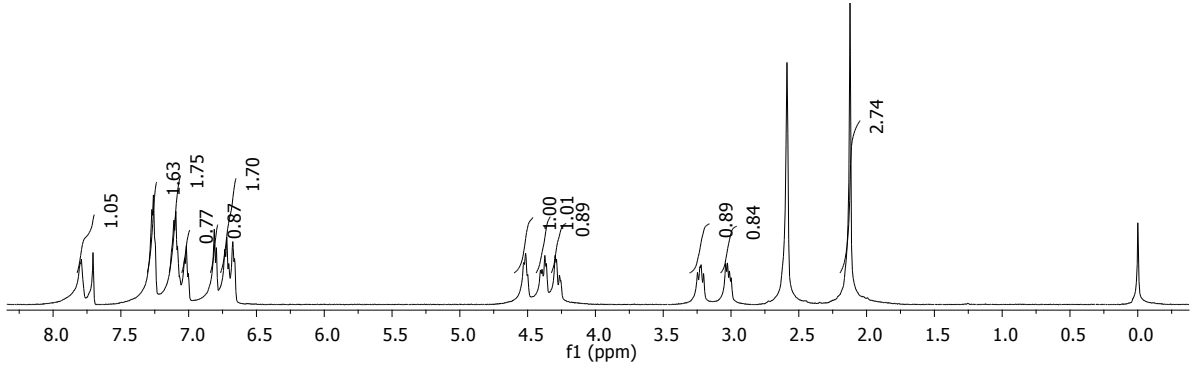

Shanta Raj  
 RC-SRL-181  
 C13CPD DMSO E:\data CUG\

171.77

160.60

154.32

136.12

131.55

130.69

128.49

127.67

126.79

119.13

118.57

115.34

102.80

78.96

78.70

78.44

29.99

10.13

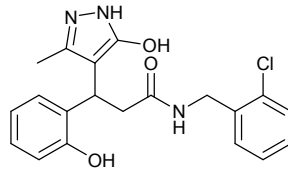

51

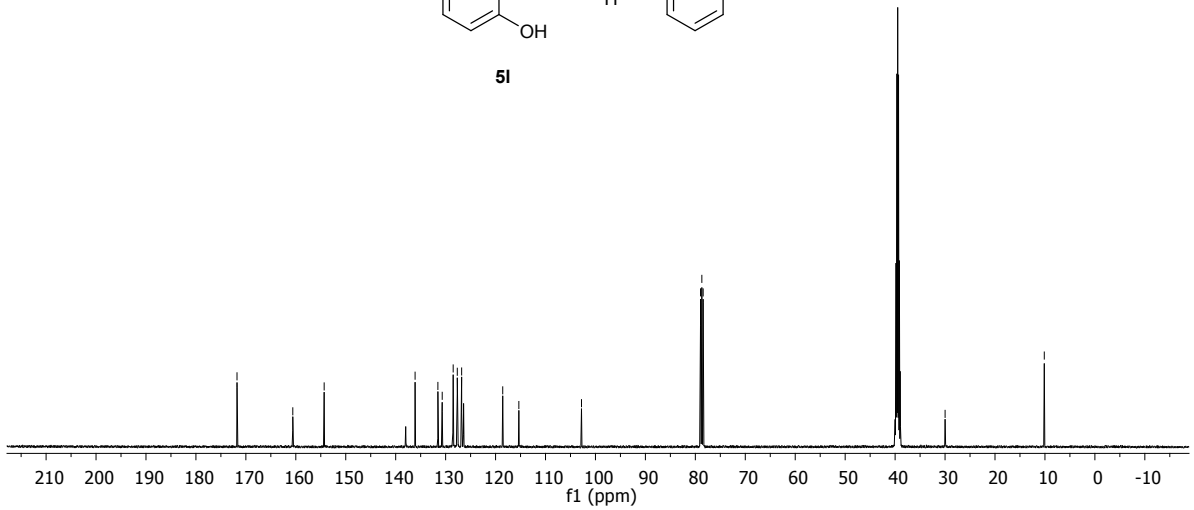

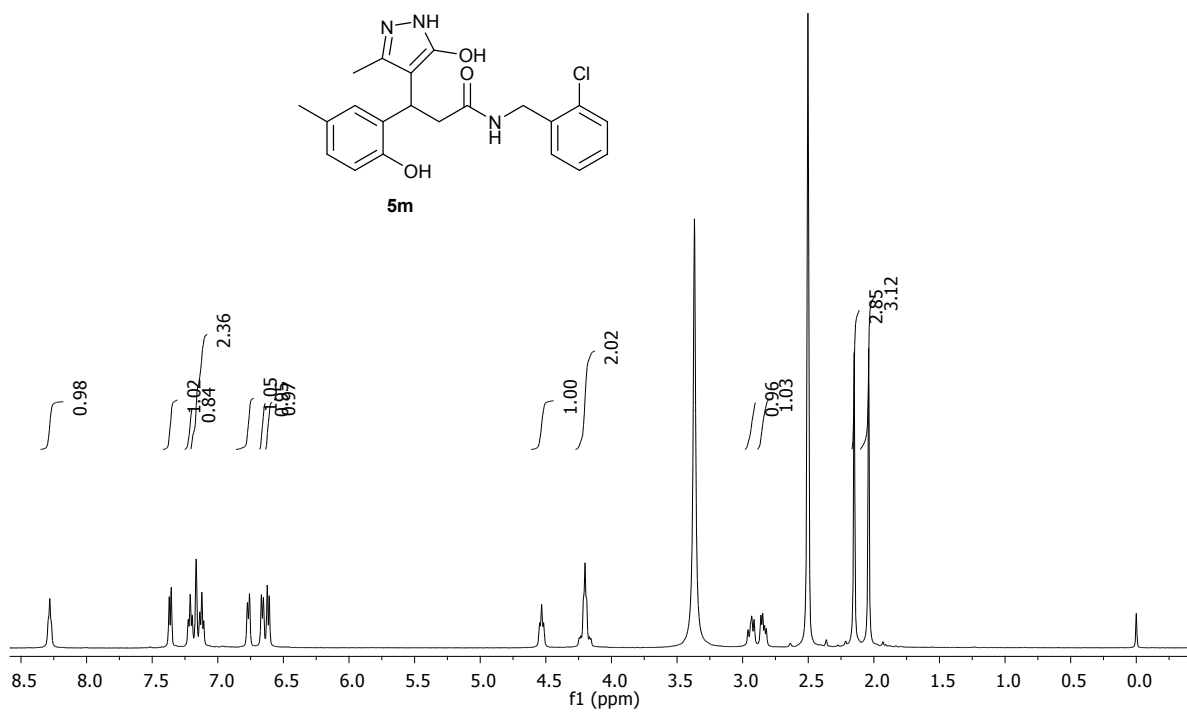

Shanta Raj  
 C13CPD DMSO-d6 data CUG

|        |        |        |        |        |        |        |        |        |        |        |        |       |       |       |       |
|--------|--------|--------|--------|--------|--------|--------|--------|--------|--------|--------|--------|-------|-------|-------|-------|
| 137.56 | 136.40 | 131.56 | 130.65 | 129.14 | 128.82 | 128.16 | 127.83 | 127.11 | 126.92 | 115.16 | 102.95 | 40.02 | 29.73 | 20.65 | 10.94 |
|--------|--------|--------|--------|--------|--------|--------|--------|--------|--------|--------|--------|-------|-------|-------|-------|

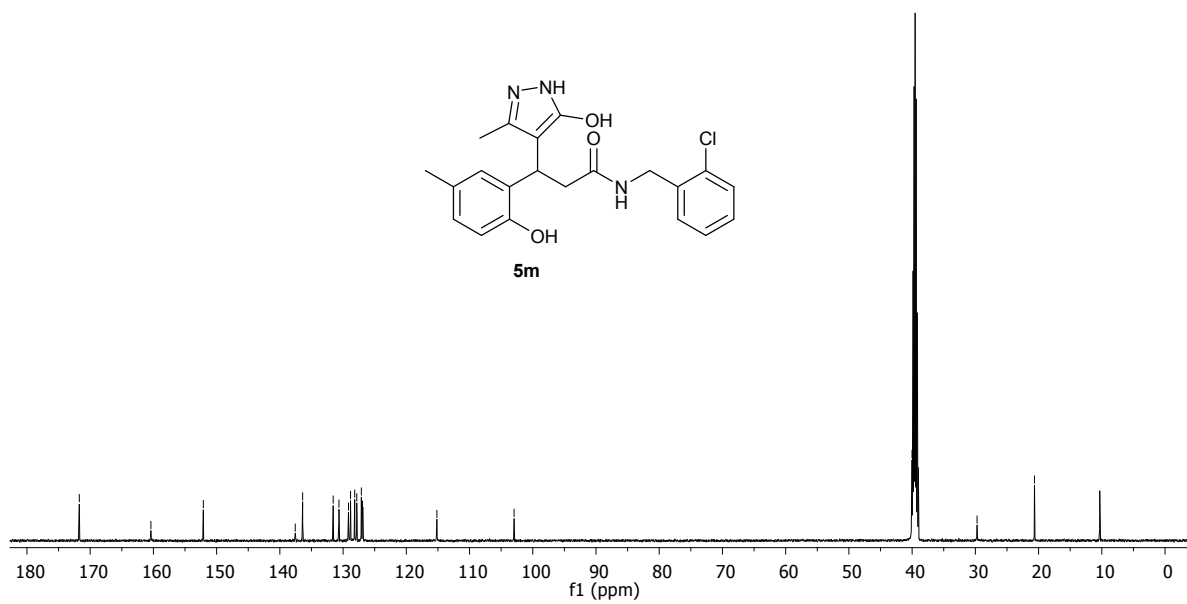



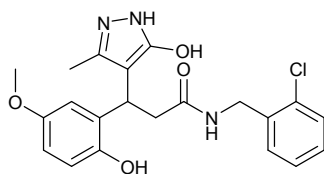

**5n**

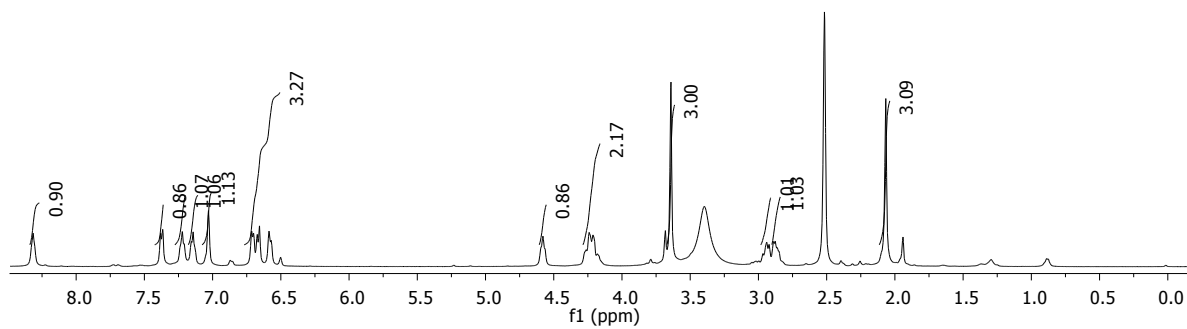

Shanta Raj  
C13CPD DMSO E:\data CUG\

171.41  
160.23  
155.71  
151.86  
147.90  
136.56  
131.89  
131.46  
128.98  
128.24  
127.92  
127.03  
115.73  
114.86  
110.96  
102.92

56.02

29.67  
29.24

10.40

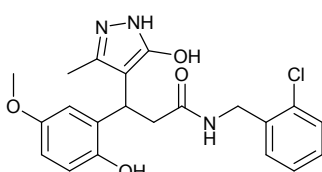

**5n**

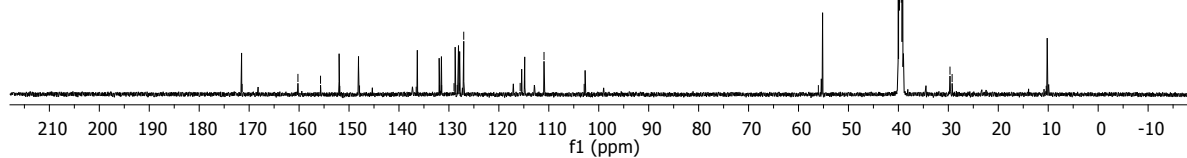

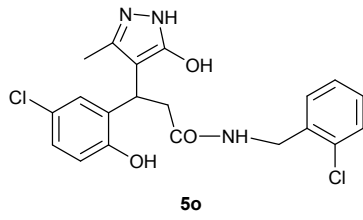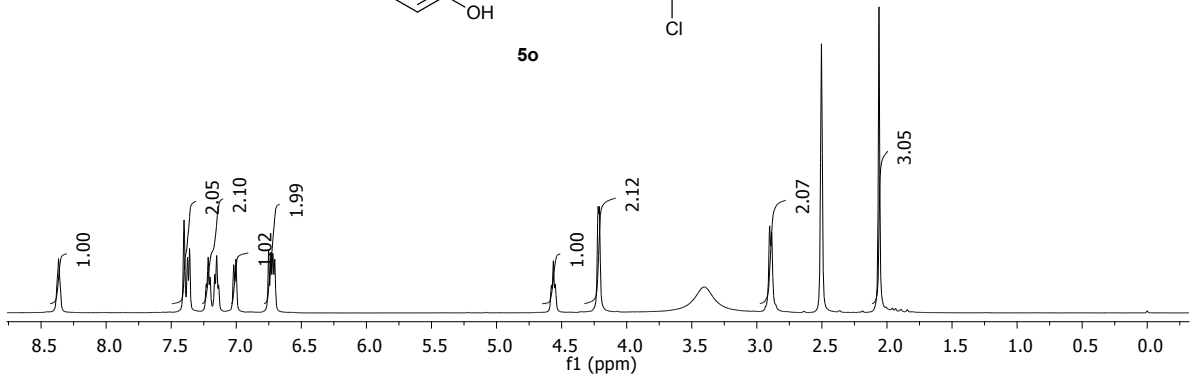

Shan Raj  
 RC-SRL-193  
 C13CPD DMSO E:\data CUG

160.15  
 153.44  
 137.31  
 136.98  
 136.34  
 133.10  
 131.55  
 128.83  
 128.16  
 127.74  
 127.09  
 126.18  
 122.11  
 116.61

102.04

29.48

10.18

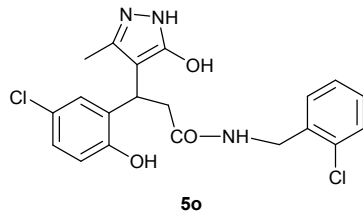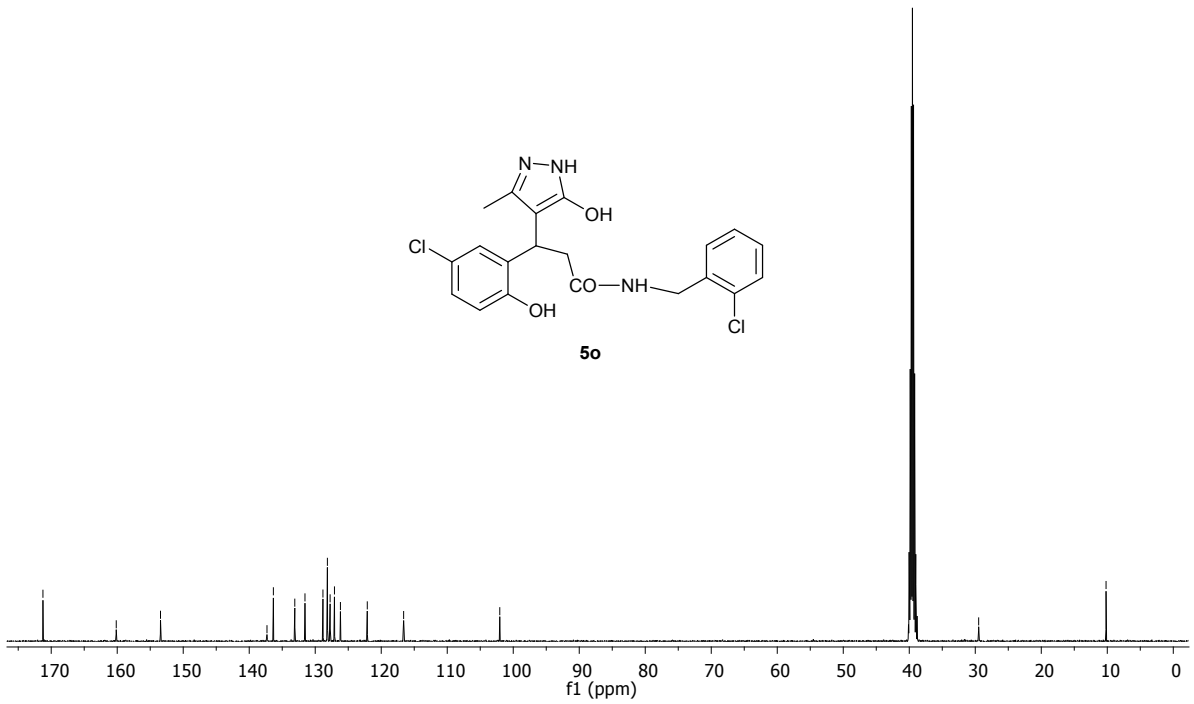

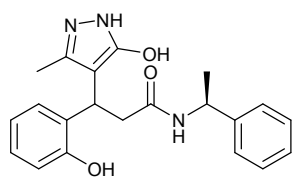

5p

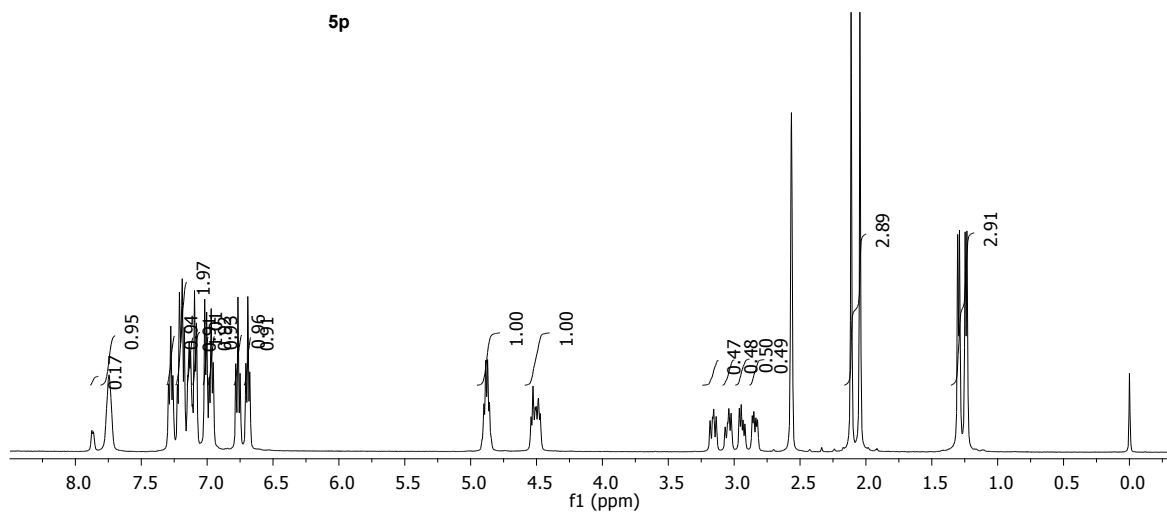

Shimadzu  
 RC-S102  
 C13CPD-DMSO-E\data CUG | 161.21 | 154.26 | 143.85 | 139.10 | 130.83 | 128.67 | 127.90 | 126.62 | 125.58 | 118.85 | 116.01 | 103.28 | 47.79 | 30.96 | 21.83 | 10.12

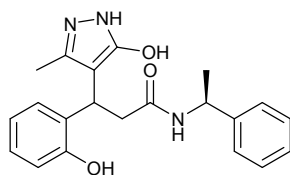

5p

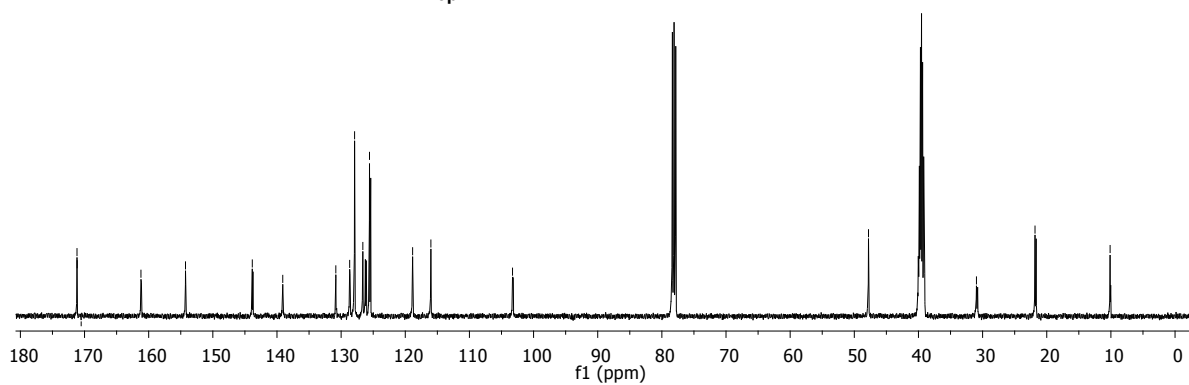

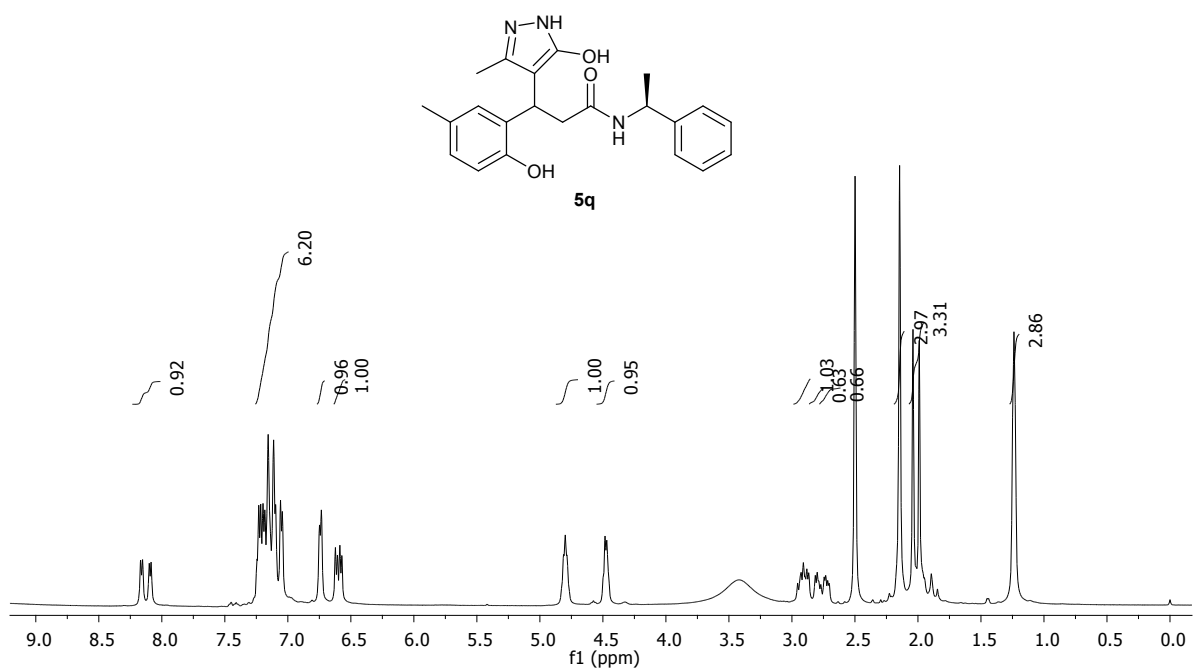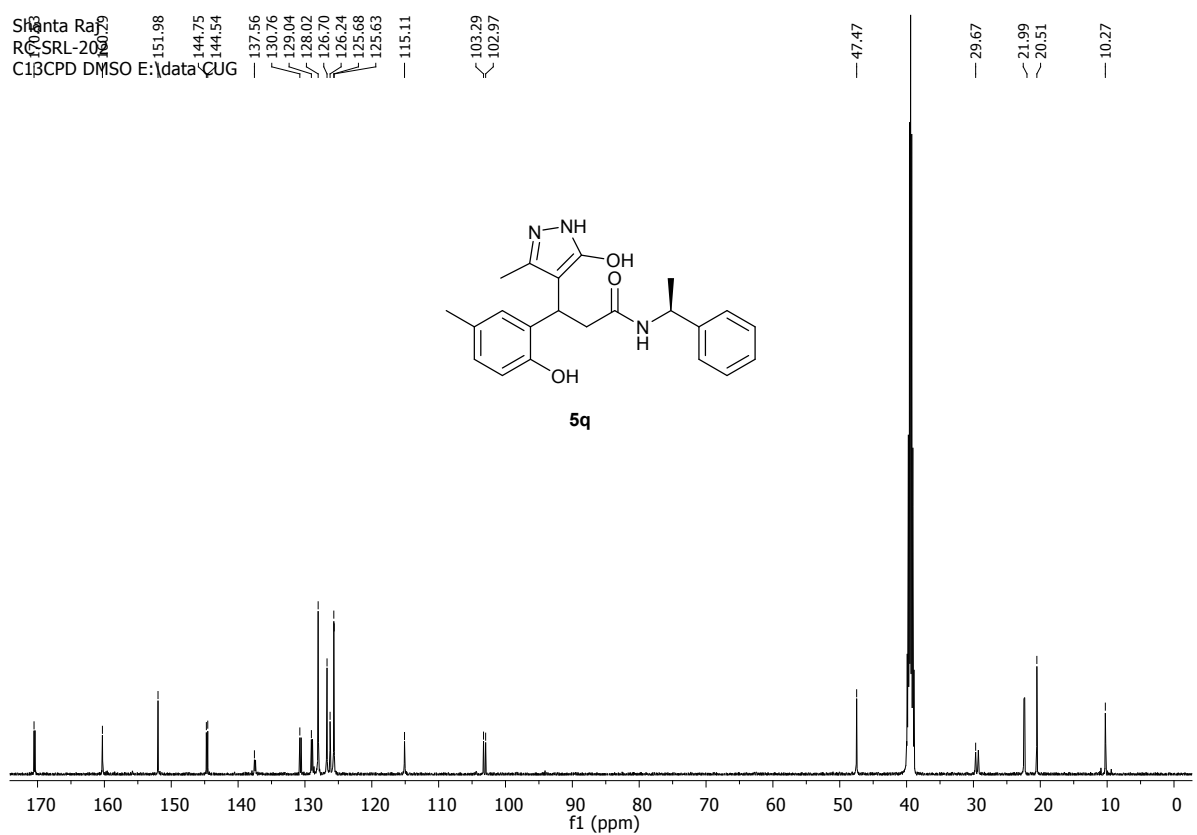

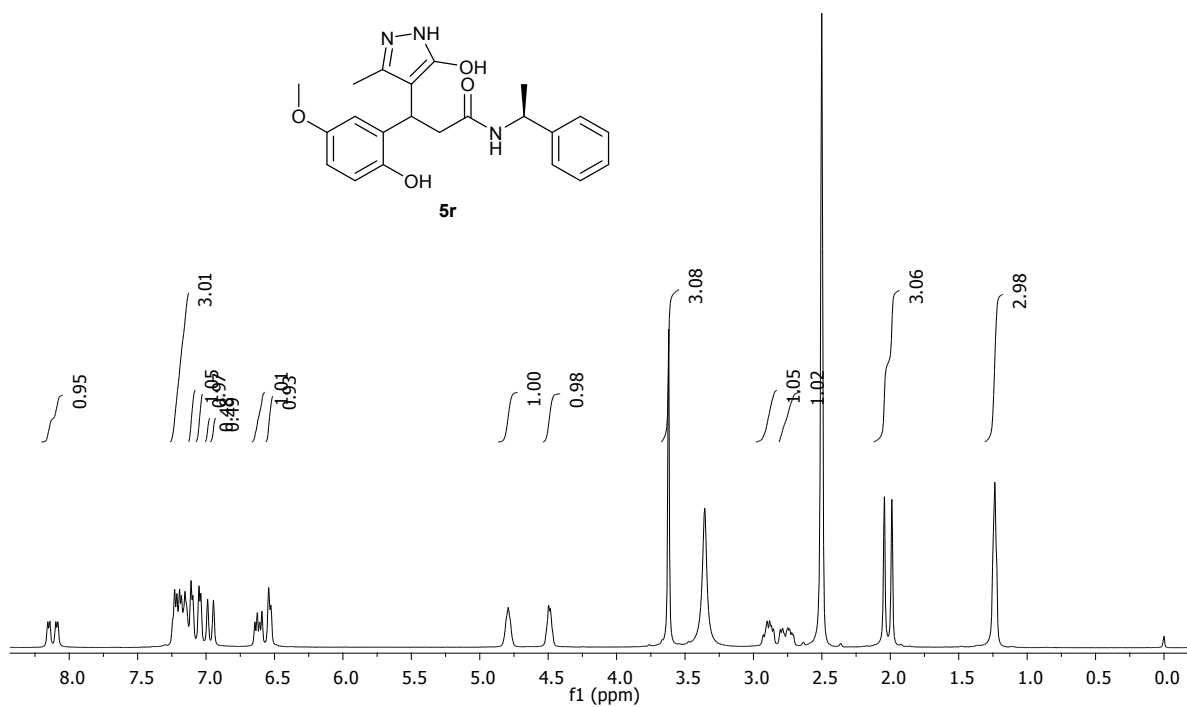

Shanta Raj  
 RC-SRL-199  
 C13CPD DMSO|E:\data CUG \

170.39  
 160.16  
 151.93  
 148.02  
 144.72  
 144.55  
 137.28  
 132.13  
 128.01  
 126.22  
 125.70  
 115.39  
 114.70  
 110.92  
 103.10

55.13  
 47.47  
 29.61  
 22.34  
 10.21

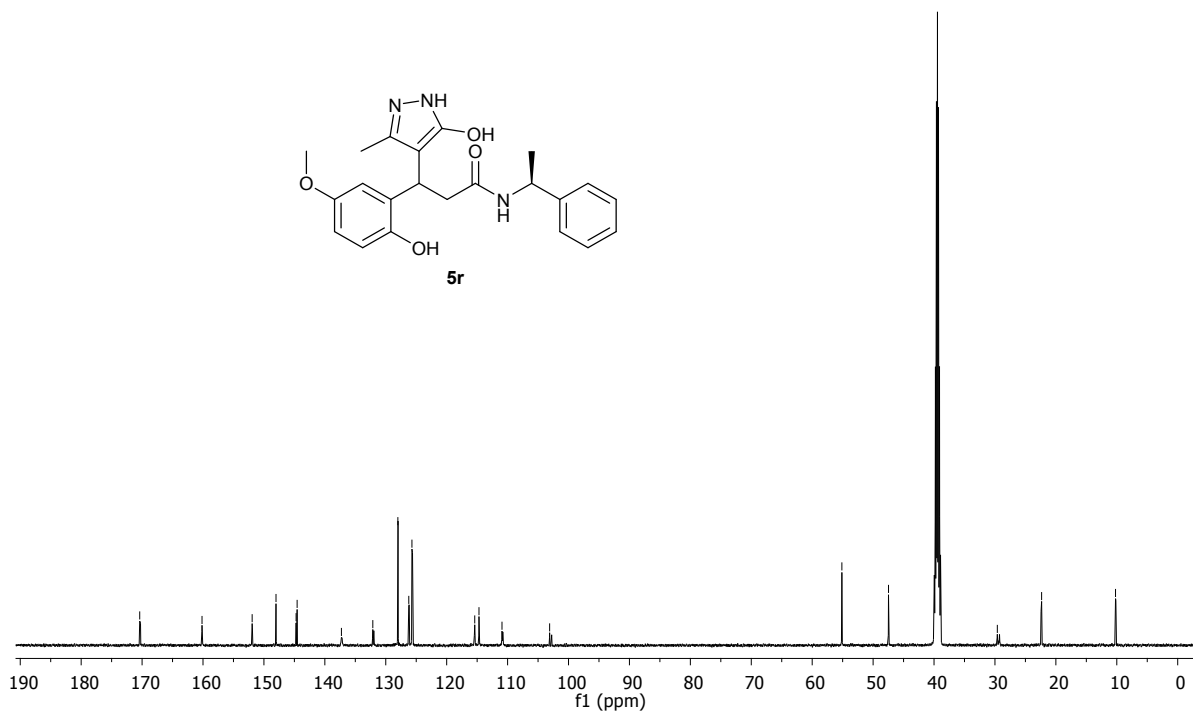

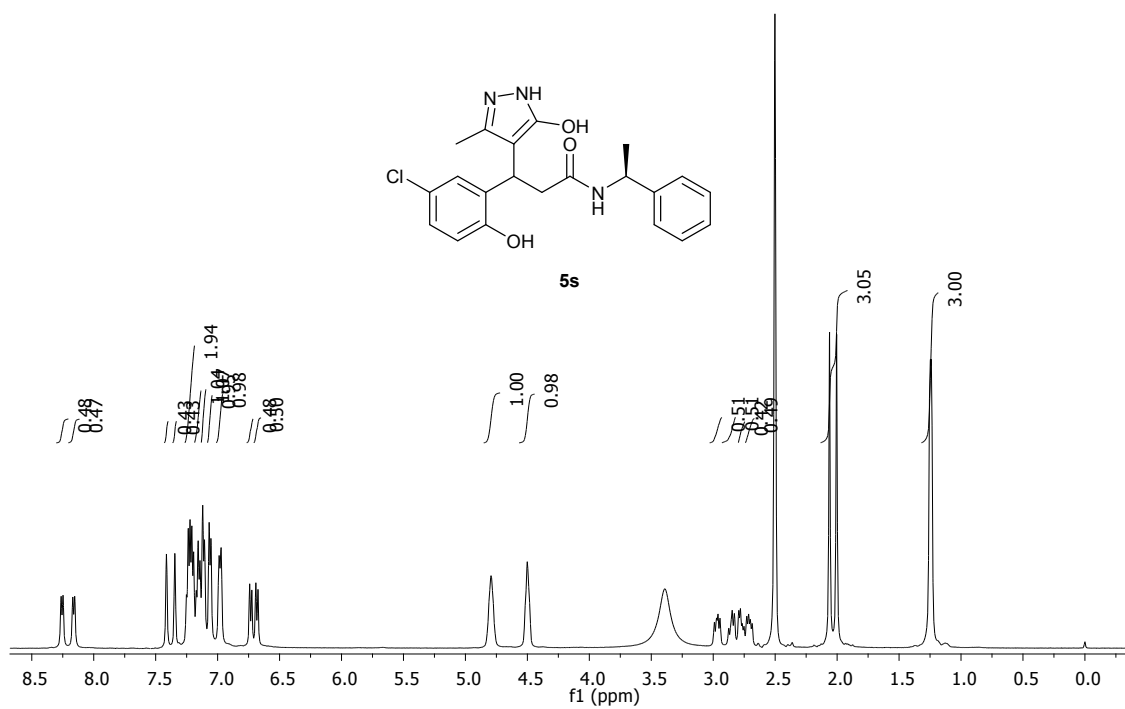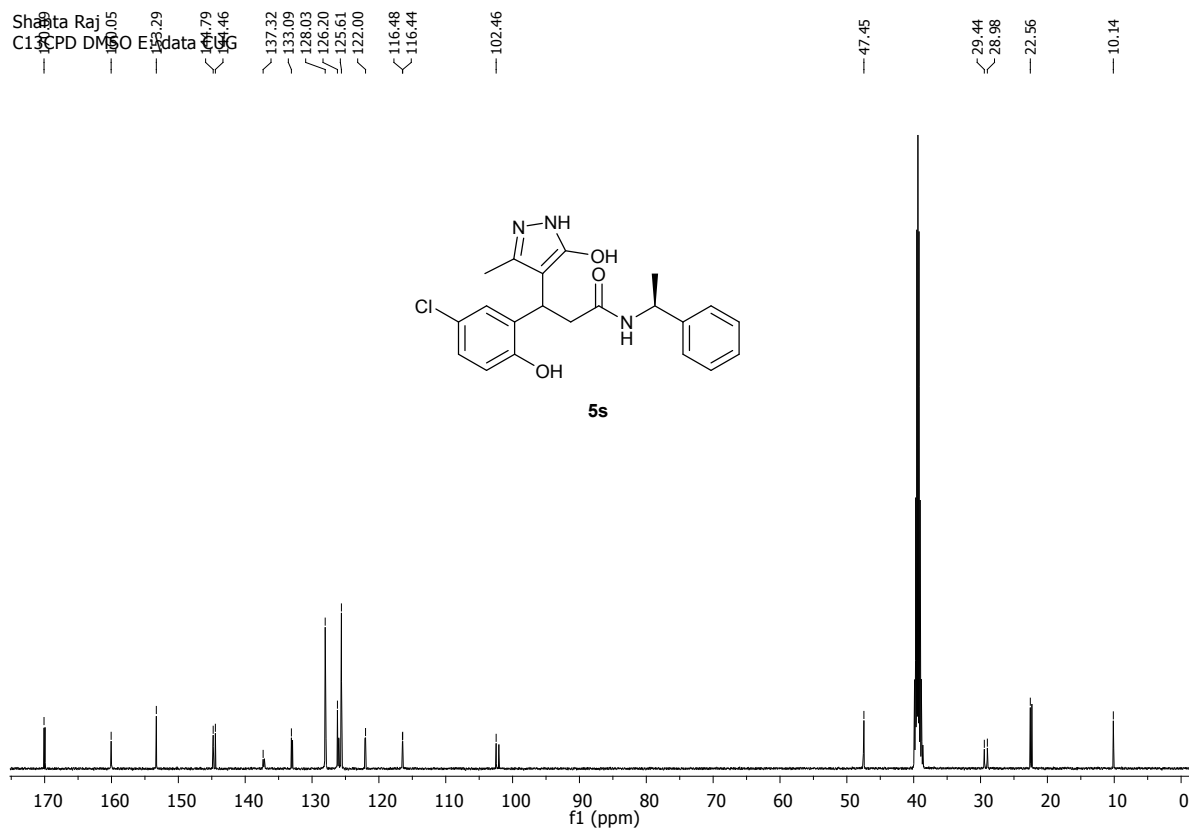

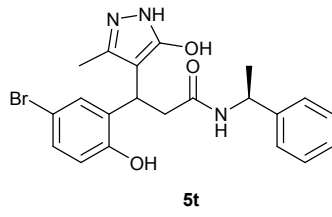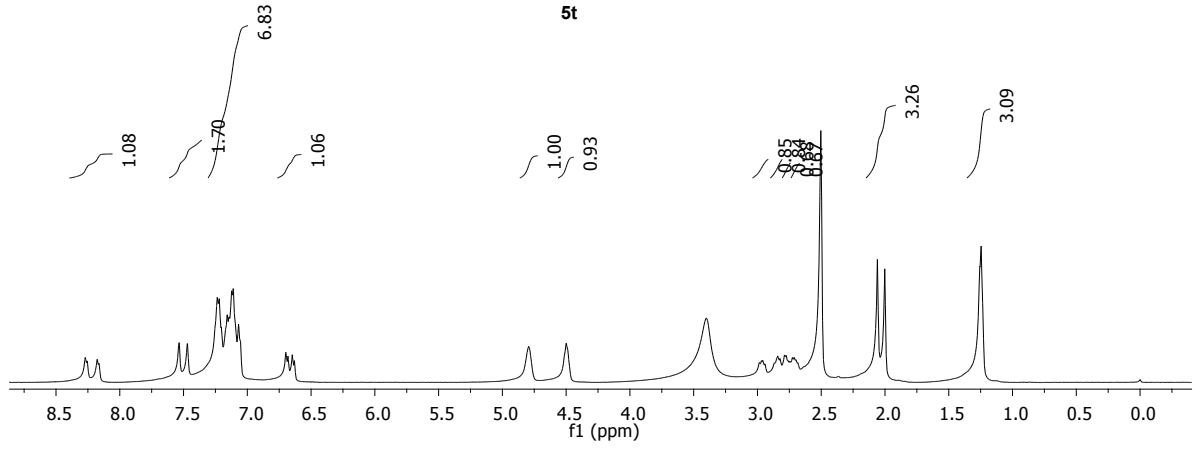

Shant Raj  
C13 CPD DMSO E:\data

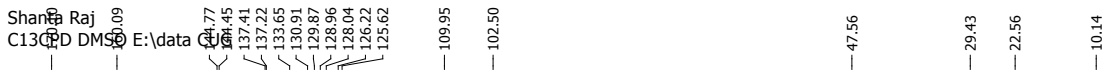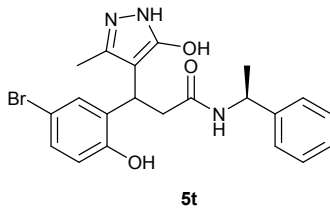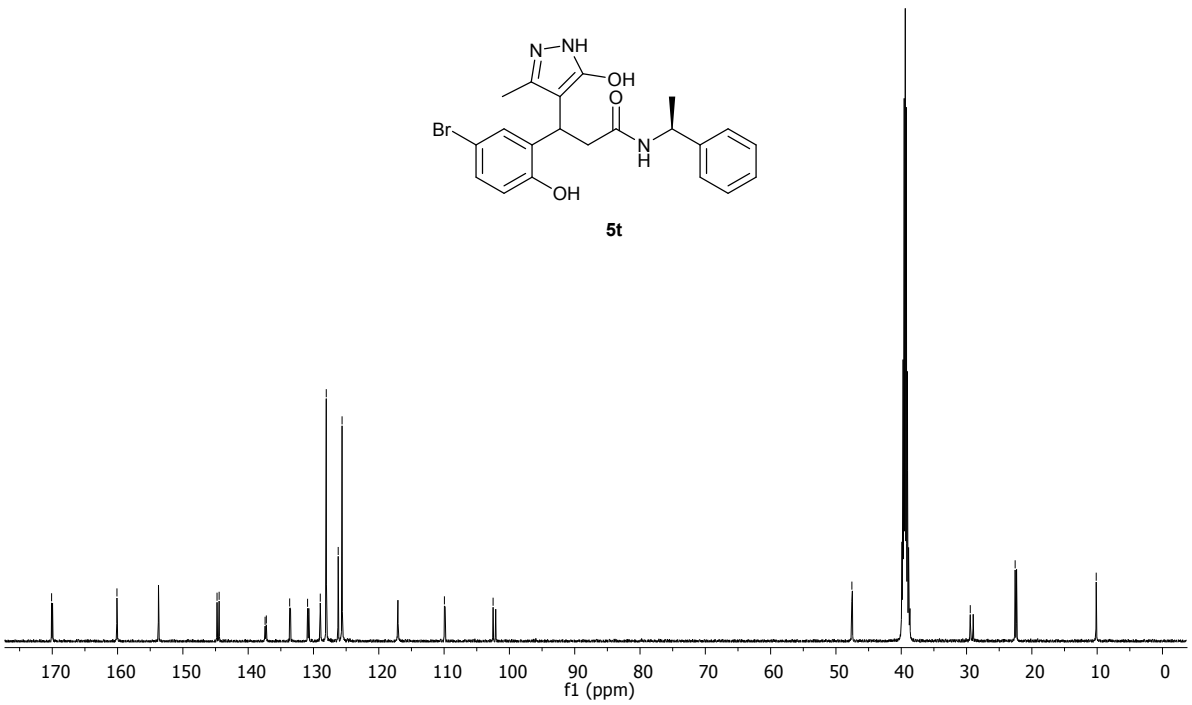

Supplement: d0ra01906b1.pdf [file d0ra01906b1.pdf]
